# Supplementary material for: Highly efficient copper-catalyzed cascade synthesis of quinazoline and quinazolinone derivatives
Source: Royal Society of Chemistry journal article supplement (doi:10.1039/b814011a), 2008-01-01

## Supporting Information

### Highly Efficient Copper-Catalyzed Cascade Synthesis of Quinazoline and Quinazolinone Derivatives

Cheng Huang,<sup>a,b</sup> Yuan Fu,<sup>†</sup> Hua Fu,<sup>\*,a</sup> Yuyang Jiang,<sup>\*,a,b</sup> Yufen Zhao<sup>b</sup>

<sup>a</sup> Key Laboratory of Bioorganic Phosphorus Chemistry and Chemical Biology (Ministry of Education), Department of Chemistry, Tsinghua University, Beijing 100084, P. R. China

<sup>b</sup> Key Laboratory of Chemical Biology (Guangdong Province), Graduate School of Shenzhen, Tsinghua University, Shenzhen 518057, P. R. China

Fax: (+86) 10-62781695

E-mail: fuhua@mail.tsinghua.edu.cn

#### Table of contents

|                                                                                                             |    |
|-------------------------------------------------------------------------------------------------------------|----|
| General experimental procedures                                                                             | P2 |
| General procedure for copper-catalyzed synthesis of quinazoline derivatives ( <b>3a-j</b> )                 | P2 |
| The characterization data of compounds <b>3a-j</b>                                                          | P2 |
| General procedure for copper-catalyzed synthesis of quinazoline derivatives ( <b>3a-j</b> )                 | P5 |
| The characterization data of compounds <b>5a-h</b> and <b>6b</b>                                            | P5 |
| References                                                                                                  | P8 |
| The <sup>1</sup> H and <sup>13</sup> C NMR spectra of compounds ( <b>3a-j</b> , <b>5a-h</b> and <b>6b</b> ) | P9 |

## General experimental procedures

All reactions were carried out under nitrogen atmosphere. DMF was freshly distilled from  $\text{CaH}_2$ . Proton and carbon magnetic resonance spectra ( $^1\text{H}$  NMR and  $^{13}\text{C}$  NMR) were recorded with tetramethylsilane or solvent resonance as the internal standard ( $^1\text{H}$  NMR: TMS at 0.00 ppm,  $\text{CDCl}_3$  at 7.26 ppm,  $\text{DMSO-d}_6$  at 2.50 ppm;  $^{13}\text{C}$  NMR:  $\text{CDCl}_3$  at 77.0 ppm,  $\text{DMSO-d}_6$  at 40.0 ppm).

**General procedure for copper-catalyzed synthesis of quinazoline derivatives (3a-j).** A flask was charged with 2-bromobenzaldehyde or 2-bromophenylketone (1 mmol), amidine hydrochloride (1.1 mmol), L-proline (46 mg, 0.4 mmol for entry 10; 23 mg, 0.2 mmol for others in Table 2),  $\text{Cs}_2\text{CO}_3$  (978 mg, 3 mmol) and DMF (10 mL) (see Table 2), the mixture was stirred for 30 min under nitrogen atmosphere at room temperature, and then CuI (38 mg, 0.2 mmol for entry 12; 19 mg, 0.1 mmol for others in Table 2) was added. After a 30 min-stirring under the same condition, reaction temperature was raised to 110 °C. After the coupling reaction for a time as shown in Table 2, the resulting solution was cooled to room temperature and filtered, and the inorganic salts were removed. The filtrate was concentrated with the aid of a rotary evaporator, and the residue was purified by column chromatography on silica gel to provide the desired product.

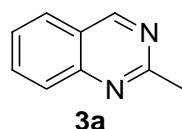

**2-Methyl-quinazoline (3a).**<sup>1</sup> Eluent: petroleum ether/ethyl acetate (from 10:1 to 2:1). Brown solid, yield 75% (108 mg), mp 37-38 °C (lit.<sup>1</sup> mp 40 °C).  $^1\text{H}$  NMR ( $\text{CDCl}_3$ , 300 MHz)  $\delta$  9.30 (s, 1H), 7.95-7.84 (m, 3H), 7.56 (t,  $J$  = 6.9 Hz, 1H), 2.90 (d,  $J$  = 6.9 Hz, 3H).  $^{13}\text{C}$  NMR ( $\text{CDCl}_3$ , 75 MHz)  $\delta$  164.4, 160.3, 150.2, 134.1, 127.6, 127.1, 127.0, 122.8, 26.4. ESI-MS  $[\text{M}+\text{H}]^+$   $m/z$  145.1.

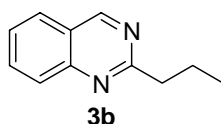

**2-Propyl-quinazoline (3b).** Eluent: petroleum ether/ethyl acetate (from 10:1 to 2:1). Brown oil, yield 82% (141 mg).  $^1\text{H}$  NMR ( $\text{CDCl}_3$ , 300 MHz)  $\delta$  9.32 (s, 1H), 7.96 (d,  $J$  = 7.6 Hz, 1H), 7.85-7.82 (m, 2H), 7.54 (t,  $J$  = 7.2 Hz, 1H), 3.11 (t,  $J$  = 7.7 Hz, 2H), 1.96 (m, 2H), 1.05 (t,  $J$  = 7.4 Hz, 3H).  $^{13}\text{C}$  NMR ( $\text{CDCl}_3$ , 75 MHz)  $\delta$  167.6, 160.3, 150.2, 133.8, 127.8, 127.0, 126.8,

123.0, 41.8, 22.2, 14.0. ESI-MS  $[M+H]^+$   $m/z$  173.3.

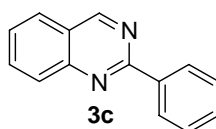

**2-Phenyl-quinazoline (3c).** Eluent: petroleum ether/ethyl acetate (from 10:1 to 2:1). Yellow solid, yield 55% (115 mg), mp 230-231 °C.  $^1\text{H}$  NMR ( $\text{CDCl}_3$ , 300 MHz)  $\delta$  11.34 (s, 1H), 8.33 (d,  $J = 7.6$  Hz, 1H), 8.25-8.21 (m, 2H), 7.86-7.78 (m, 2H), 7.60-7.58 (m, 3H), 7.54-7.48 (m, 1H).  $^{13}\text{C}$  NMR ( $\text{CDCl}_3$ , 75 MHz)  $\delta$  163.7, 153.7, 151.8, 149.6, 135.0, 132.9, 131.8, 129.2, 128.1, 127.4, 126.9, 126.5. ESI-MS:  $[M+H]^+$   $m/z$  206.1 . ESI-MS  $[M+H]^+$   $m/z$  206.9.

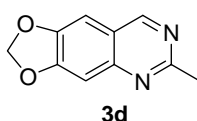

**6-Methyl-[1,3]dioxolo[4,5-g]quinazoline (3d).**<sup>2</sup> Eluent: petroleum ether/ethyl acetate (from 10:1 to 2:1). Yellow solid, yield 92% (179 mg), mp 168-169 °C (lit.<sup>2</sup> 176 °C).  $^1\text{H}$  NMR ( $\text{CDCl}_3$ , 300 MHz)  $\delta$  9.00 (s, 1H), 7.19 (s, 1H), 7.04 (s, 1H), 6.13 (s, 2H), 2.81 (s, 3H).  $^{13}\text{C}$  NMR ( $\text{CDCl}_3$ , 75 MHz)  $\delta$  163.2, 157.4, 154.2, 150.0, 147.9, 119.9, 104.2, 102.2, 101.8, 26.1. ESI-MS  $[M+H]^+$   $m/z$  189.0.

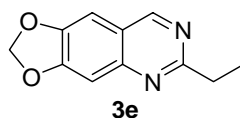

**6-Propyl-[1,3]dioxolo[4,5-g]quinazoline (3e).**<sup>2</sup> Eluent: petroleum ether/ethyl acetate (from 10:1 to 2:1). Yellow solid, yield 95% (205 mg), mp 82-83 °C (lit.<sup>2</sup> 78 °C).  $^1\text{H}$  NMR ( $\text{CDCl}_3$ , 300 MHz)  $\delta$  9.01 (s, 1H), 7.21 (s, 1H), 7.04 (s, 1H), 6.12 (s, 2H), 3.00 (t,  $J = 7.6$  Hz, 2H), 1.91 (m, 2H), 1.02 (t, 38 Hz, 3H).  $^{13}\text{C}$  NMR ( $\text{CDCl}_3$ , 75 MHz)  $\delta$  166.4, 157.4, 154.0, 149.9, 147.9, 120.1, 104.3, 102.1, 101.7, 41.6, 22.4, 14.0. ESI-MS  $[M+H]^+$   $m/z$  217.1.

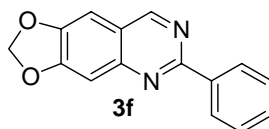

**6-Phenyl-[1,3]dioxolo[4,5-g]quinazoline (3f).** Eluent: petroleum ether/ethyl acetate (from 10:1 to 2:1). Yellow solid, yield 89% (222 mg), mp 154-155 °C.  $^1\text{H}$  NMR ( $\text{CDCl}_3$ , 300 MHz)  $\delta$  9.14 (s, 1H), 8.53 (d\*d,  $J_1 = 7.9$  Hz,  $J_2 = 3.0$  Hz, 2H), 7.45-7.52 (m, 3H), 7.31 (s, 1H), 7.08 (s, 1H), 6.12 (s, 2H).  $^{13}\text{C}$  NMR ( $\text{CDCl}_3$ , 75 MHz)  $\delta$  160.1, 157.6, 154.2, 150.4, 148.3, 138.3,

130.3, 128.6, 128.3, 120.8, 105.1, 102.3, 101.9. ESI-MS  $[M+H]^+$   $m/z$  251.2.

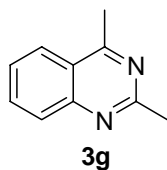

**2,4-Dimethyl-quinazoline (3g).**<sup>3</sup> Eluent: petroleum ether/ethyl acetate (from 10:1 to 3:1). Yellow solid, yield 84% (133 mg), mp 288-290 °C (lit.<sup>3</sup> 300 °C). <sup>1</sup>H NMR (CDCl<sub>3</sub>, 300 MHz)  $\delta$  7.98 (d,  $J$  = 8.3 Hz, 1H), 7.90 (d,  $J$  = 8.3 Hz, 1H), 7.80 (t,  $J$  = 7.2 Hz, 1H), 7.52 (t,  $J$  = 7.9 Hz, 1H), 2.88 (s, 3H), 2.84 (s, 3H). <sup>13</sup>C NMR (CDCl<sub>3</sub>, 75 MHz)  $\delta$  168.0, 163.5, 149.8, 133.5, 128.2, 126.5, 124.8, 122.1, 26.4, 21.6. ESI-MS  $[M+H]^+$   $m/z$  159.0.

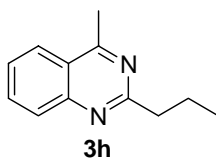

**4-Methyl-2-propyl-quinazoline (3h).** Eluent: petroleum ether/ethyl acetate (from 10:1 to 3:1). Brown solid, yield 86% (160 mg), mp 209-210 °C. <sup>1</sup>H NMR (CDCl<sub>3</sub>, 300 MHz)  $\delta$  7.79 (t,  $J_1$  = 7.6 Hz,  $J_2$  = 7.9 Hz, 2H), 7.63 (t,  $J$  = 7.2 Hz, 1H), 7.33 (t,  $J$  = 7.53 Hz, 1H), 2.90 (t,  $J$  = 7.7 Hz, 2H), 2.73 (s, 3H), 1.82 (m, 2H), 0.90 (t,  $J$  = 7.4 Hz, 3H). <sup>13</sup>C NMR (CDCl<sub>3</sub>, 75 MHz)  $\delta$  167.8, 166.6, 149.8, 133.2, 128.3, 126.3, 124.7, 122.2, 41.9, 22.3, 21.6, 14.0. ESI-MS  $[M+H]^+$   $m/z$  187.0.

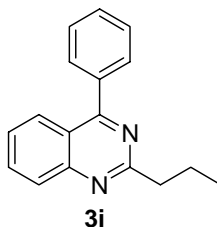

**2-Propyl-4-phenylquinazoline (3i).**<sup>4</sup> Eluent: petroleum ether/ethyl acetate (from 10:1 to 3:1). White solid, yield 81% (201 mg), mp 99-100 °C (lit.<sup>4</sup> 100 °C). <sup>1</sup>H NMR (CDCl<sub>3</sub>, 300 MHz)  $\delta$  8.04 (d,  $J$  = 8.6 Hz, 2H), 7.88-7.81 (m, 1H), 7.79-7.72 (m, 2H), 7.59-7.47 (m, 4H), 3.15 (t,  $J$  = 7.7 Hz, 2H), 2.01 (m, 2H), 1.07 (t,  $J$  = 7.4 Hz, 3H). <sup>13</sup>C NMR (CDCl<sub>3</sub>, 75 MHz)  $\delta$  168.6, 167.2, 151.5, 137.5, 133.6, 130.0, 129.9, 128.7, 128.4, 127.1, 126.7, 121.3, 42.1, 22.5, 14.2. ESI-MS  $[M+H]^+$   $m/z$  248.8.

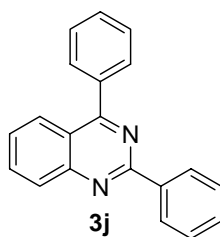

**2,4-Diphenylquinazoline (3j).**<sup>5</sup> Eluent: petroleum ether/ethyl acetate (from 10:1 to 3:1). Yellow solid, yield 61% (172 mg), mp 116-117°C (lit.<sup>5</sup> 118-120 °C). <sup>1</sup>H NMR (DMSO-d<sub>6</sub>, 300 MHz) δ 8.23-8.05 (m, 4H), 7.78-7.21 (m, 10H). <sup>13</sup>C NMR (DMSO-d<sub>6</sub>, 75 MHz) δ 162.1, 155.6, 131.8, 130.8, 129.6, 129.3, 128.3, 128.0, 127.8, 127.2, 126.7, 126.4. ESI-MS [M+H]<sup>+</sup> m/z 283.2.

**General procedure for copper-catalyzed synthesis of quinazolinone derivatives (5a-h) and quinazoline derivative (6b).** A flask was charged with substituted methyl 2-halobenzoate (1 mmol), amidine hydrochloride (1.1 mmol), L-proline (23 mg, 0.2 mmol), Cs<sub>2</sub>CO<sub>3</sub> (978 mg, 3 mmol) and DMF (10 mL) (see Table 3), the mixture was stirred for 30 min under nitrogen atmosphere at room temperature, and then CuI (19 mg, 0.1 mmol) was added. After a 30 min-stirring under the same condition, reaction temperature was raised to 80 °C. After the coupling reaction for a time as shown in Table 3, the resulting solution was cooled to room temperature and filtered, and the inorganic salts were removed. The filtrate was concentrated with the aid of a rotary evaporator, and the residue was purified by column chromatography on silica gel to provide the desired product.

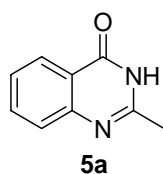

**2-Methyl-3H-quinazolin-4-one (5a).**<sup>6</sup> Eluent: petroleum ether/ethyl acetate (from 10:1 to 3:1). White solid, Yield 91% (146 mg) using methyl 2-bromobenzoate as the substrate; 90% (144 mg) using methyl 2-chlorobenzoate as the substrate. mp 235-236 °C (lit.<sup>6</sup> mp 238 °C). <sup>1</sup>H NMR (CDCl<sub>3</sub>, 300 MHz) δ 8.27 (d, *J* = 7.9 Hz, 1H), 7.83-7.43 (m, 4H), 2.60 (t, 3H). <sup>13</sup>C NMR (CDCl<sub>3</sub>, 75 MHz) δ 164.5, 153.5, 149.5, 135.0, 127.0, 126.5, 126.3, 120.3, 22.1. ESI-MS [M+H]<sup>+</sup> m/z 161.3.

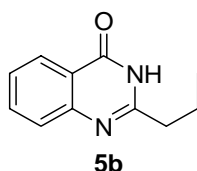

**2-Propyl-3H-quinazolin-4-one (5b).**<sup>6</sup> Eluent: petroleum ether/ethyl acetate (from 10:1 to 3:1). White solid, yield 74% (139 mg) using methyl 2-bromobenzoate as the substrate; 77% (145 mg) using methyl 2-chlorobenzoate as the substrate. mp 208-209 °C (lit.<sup>6</sup> mp 207 °C). <sup>1</sup>H NMR (CDCl<sub>3</sub>, 300 MHz) δ 12.08 (s, 1H), 8.29 (d, *J* = 7.9 Hz, 1H), 7.78-7.70 (m, 2H), 7.48 (t, *J*<sub>1</sub> = 6.9 Hz, *J*<sub>2</sub> = 7.5 Hz, 1H), 2.80 (t, *J* = 7.6 Hz, 2H), 1.95 (m, 2H), 1.09 (t, *J* = 7.2 Hz, 3H). <sup>13</sup>C NMR (CDCl<sub>3</sub>, 75 MHz) δ 164.5, 157.0, 149.5, 134.9, 127.3, 126.5, 126.3, 120.6, 37.8, 21.1, 13.8. ESI-MS [M+H]<sup>+</sup> *m/z* 189.0.

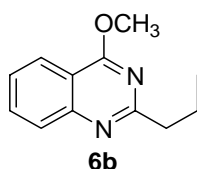

**4-Methoxy-2-propyl-quinazoline (6b).** Eluent: petroleum ether/ethyl acetate (from 10:1 to 5:1). White solid, yield 22% (44 mg) using methyl 2-bromobenzoate as the substrate; 18% (36 mg) using methyl 2-chlorobenzoate as the substrate. mp 73-74 °C. <sup>1</sup>H NMR (CDCl<sub>3</sub>, 300 MHz) δ 8.21 (d, *J* = 7.9 Hz, 1H), 7.68-7.57 (m, 2H), 7.39 (t, *J* = 6.9 Hz, 1H), 3.58 (s, 3H), 2.75 (t, *J* = 7.7 Hz, 2H), 1.90-1.79 (m, 2H), 1.07 (t, *J* = 7.4 Hz, 3H). <sup>13</sup>C NMR (CDCl<sub>3</sub>, 75 MHz) δ 162.4, 156.9, 147.2, 133.9, 126.8, 126.6, 126.2, 120.1, 37.5, 30.4, 20.2, 13.9. ESI-MS [M+H]<sup>+</sup> *m/z* 203.3.

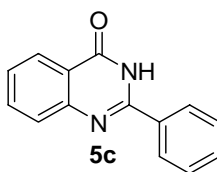

**2-Phenyl-3H-quinazolin-4-one (5c).**<sup>6</sup> Eluent: petroleum ether/ethyl acetate (from 10:1 to 3:1). Yield 89% (198 mg) using methyl 2-bromobenzoate as the substrate; 86% (191 mg) using methyl 2-chlorobenzoate as the substrate. mp 235-236 °C (lit.<sup>6</sup> mp 236 °C). <sup>1</sup>H NMR (CDCl<sub>3</sub>, 300 MHz) δ 11.77 (s, 1H), 8.35-8.27 (m, 3H), 7.84-7.75 (m, 2H), 7.60-7.50 (m, 4H). <sup>13</sup>C NMR (CDCl<sub>3</sub>, 75 MHz) δ 164.0, 151.9, 149.6, 135.0, 133.0, 131.8, 129.1, 128.1, 127.5, 126.9, 126.5. ESI-MS [M+H]<sup>+</sup> *m/z* 223.3.

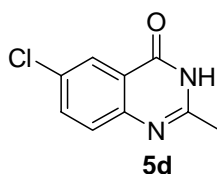

**6-Chloro-2-methylquinazolin-4(3H)-one (5d).** Eluent: petroleum ether/ethyl acetate (from 10:1 to 1:1). Yellow solid, yield 87% (169 mg, mp 214-215 °C.  $^1\text{H}$  NMR (DMSO- $d_6$ , 300 MHz)  $\delta$  12.40 (s, br, 1H), 7.99 (d,  $J$  = 2.4 Hz, 1H), 7.78 (dd,  $J_1$  = 8.91 Hz,  $J_2$  = 2.4 Hz, 1H), 7.59 (d,  $J$  = 8.9 Hz, 1H), 2.36 (s, 3H).  $^{13}\text{C}$  NMR (DMSO- $d_6$ , 75 MHz)  $\delta$  161.3, 155.5, 148.1, 134.8, 130.6, 129.3, 125.2, 122.4, 22.0. ESI-MS  $[\text{M}+\text{H}]^+$   $m/z$  194.9.

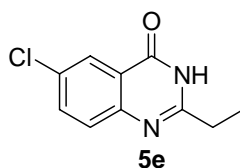

**6-Chloro-2-propyl-3H-quinazolin-4-one (5e).** Eluent: petroleum ether/ethyl acetate (from 10:1 to 1:1). White solid, Yield 95% (211 mg), mp 230-231 °C.  $^1\text{H}$  NMR (DMSO- $d_6$ , 300 MHz)  $\delta$  12.32 (s, 1H), 7.96 (d,  $J$  = 2.4 Hz, 1H), 7.74 (dd,  $J_1$  = 8.6 Hz,  $J_2$  = 2.4 Hz, 1H), 7.58 (d,  $J$  = 8.6 Hz, 1H), 2.50 (t,  $J$  = 7.9 Hz, 2H), 1.70 (m, 2H), 0.89 (t,  $J$  = 7.4 Hz, 3H).  $^{13}\text{C}$  NMR (DMSO- $d_6$ , 75 MHz)  $\delta$  161.4, 158.5, 148.2, 134.9, 130.7, 129.6, 125.2, 122.6, 39.7, 20.7, 14.0. ESI-MS  $[\text{M}+\text{H}]^+$   $m/z$  223.2.

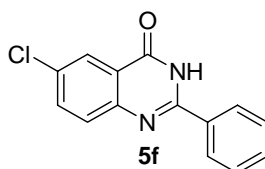

**6-Chloro-2-phenyl-3H-quinazolin-4-one (5f).**<sup>7</sup> Eluent: petroleum ether/ethyl acetate (from 10:1 to 1:1). White solid, Yield 86% (220 mg), mp 208-209 °C (lit.<sup>7</sup> mp 210 °C).  $^1\text{H}$  NMR ( $\text{CDCl}_3$ , 300 MHz)  $\delta$  8.06-8.02 (m, 3H), 7.43-7.41 (t,  $J_1$  = 3.5 Hz,  $J_2$  = 2.7 Hz, 5H).  $^{13}\text{C}$  NMR ( $\text{CDCl}_3$ , 75 MHz)  $\delta$  170.00, 133.5, 132.1, 128.7, 127.5. ESI-MS  $[\text{M}+\text{H}]^+$   $m/z$  256.8.

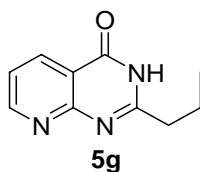

**2-Propylpyrido[2,3-d]pyrimidin-4(3H)-one (5g).** Eluent: petroleum ether/ethyl acetate (2:1)

and then ethyl acetate/methanol (8:1). White solid, Yield 82% (155 mg), mp 151-152 °C. <sup>1</sup>H NMR (CDCl<sub>3</sub>, 300 MHz) δ 13.11 (s, br., 1H), 12.09 (s, br, 1H), 8.68 (d, *J* = 9.30 Hz, 1H), 7.81 (d, *J* = 6.2 Hz, 1H), 6.65 (t, *J*<sub>1</sub> = 6.2 Hz, *J*<sub>2</sub> = 9.3 Hz, 1H), 2.85 (t, *J* = 7.4 Hz, 2H), 1.76 (m, 2H), 1.02 (t, *J* = 7.4 Hz, 3H). <sup>13</sup>C NMR (CDCl<sub>3</sub>, 75 MHz) δ 175.6, 163.9, 162.2, 147.4, 140.2, 120.3, 108.5, 40.4, 17.8, 13.8. ESI-MS [M+H]<sup>+</sup> *m/z* 190.2.

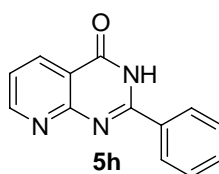

**2-Phenylpyrido[2,3-d]pyrimidin-4(3H)-one (5h).**<sup>8</sup> Eluent: petroleum ether/ethyl acetate (5:1) and then ethyl acetate. Yield 76% (169 mg), mp 284-285 °C (lit.<sup>8</sup> mp 287-289 °C). <sup>1</sup>H NMR (CDCl<sub>3</sub>, 300 MHz) δ 9.27 (s, br, 1H), 8.65 (d, *J* = 7.9 Hz, 3H), 7.62-7.53 (m, 5H). <sup>13</sup>C NMR (CDCl<sub>3</sub>, 75 MHz) δ 162.2, 155.6, 130.8, 130.7, 129.6, 129.3, 126.5. ESI-MS [M+H]<sup>+</sup> *m/z* 224.1.

## References

- 1 T. Higashino, H. Kokubo, A. Goto, M. Takenoto, E. Hayashi, *Chem. Pharm. Bull.* **1984**, 32, 3690.
- 2 K. Lempert, J. Fetter, J. Nyitrai, F. Bertha, *J. Chem. Soc. Perkin Trans. I* **1986**, 269.
- 3 A. Motohiro, Y. Jun, K. Teruyuki, W. Yoshihisa *J. Organomet. Chem.* **1995**, 494, 229.
- 4 J. Bergman; A. Brynolf, B. Elman, E. Vuorinen, *Tetrahedron* **1986**, 42, 3697.
- 5 A. Fürstner, A. Leitner, M. Méndez, H. Krause, *J. Am. Chem. Soc.* **2002**, 124, 13856.
- 6 P. Salehi, M. Dabiri, M. A. Zolfigol, M. Baghbanzadeh, *Tetrahedron Lett.* **2005**, 46, 7051.
- 7 T. M. Potewar, R. N. Nadaf, T. Daniel, R. J. Lahoti, K. V. Srinivasan, *Synth. Commun.* **2005**, 35, 231.
- 9 M. Kočevár, J. Koller, B. Stanovnik, Tišler, M. *Monatshefte Chem.* **1987**, 118, 399.



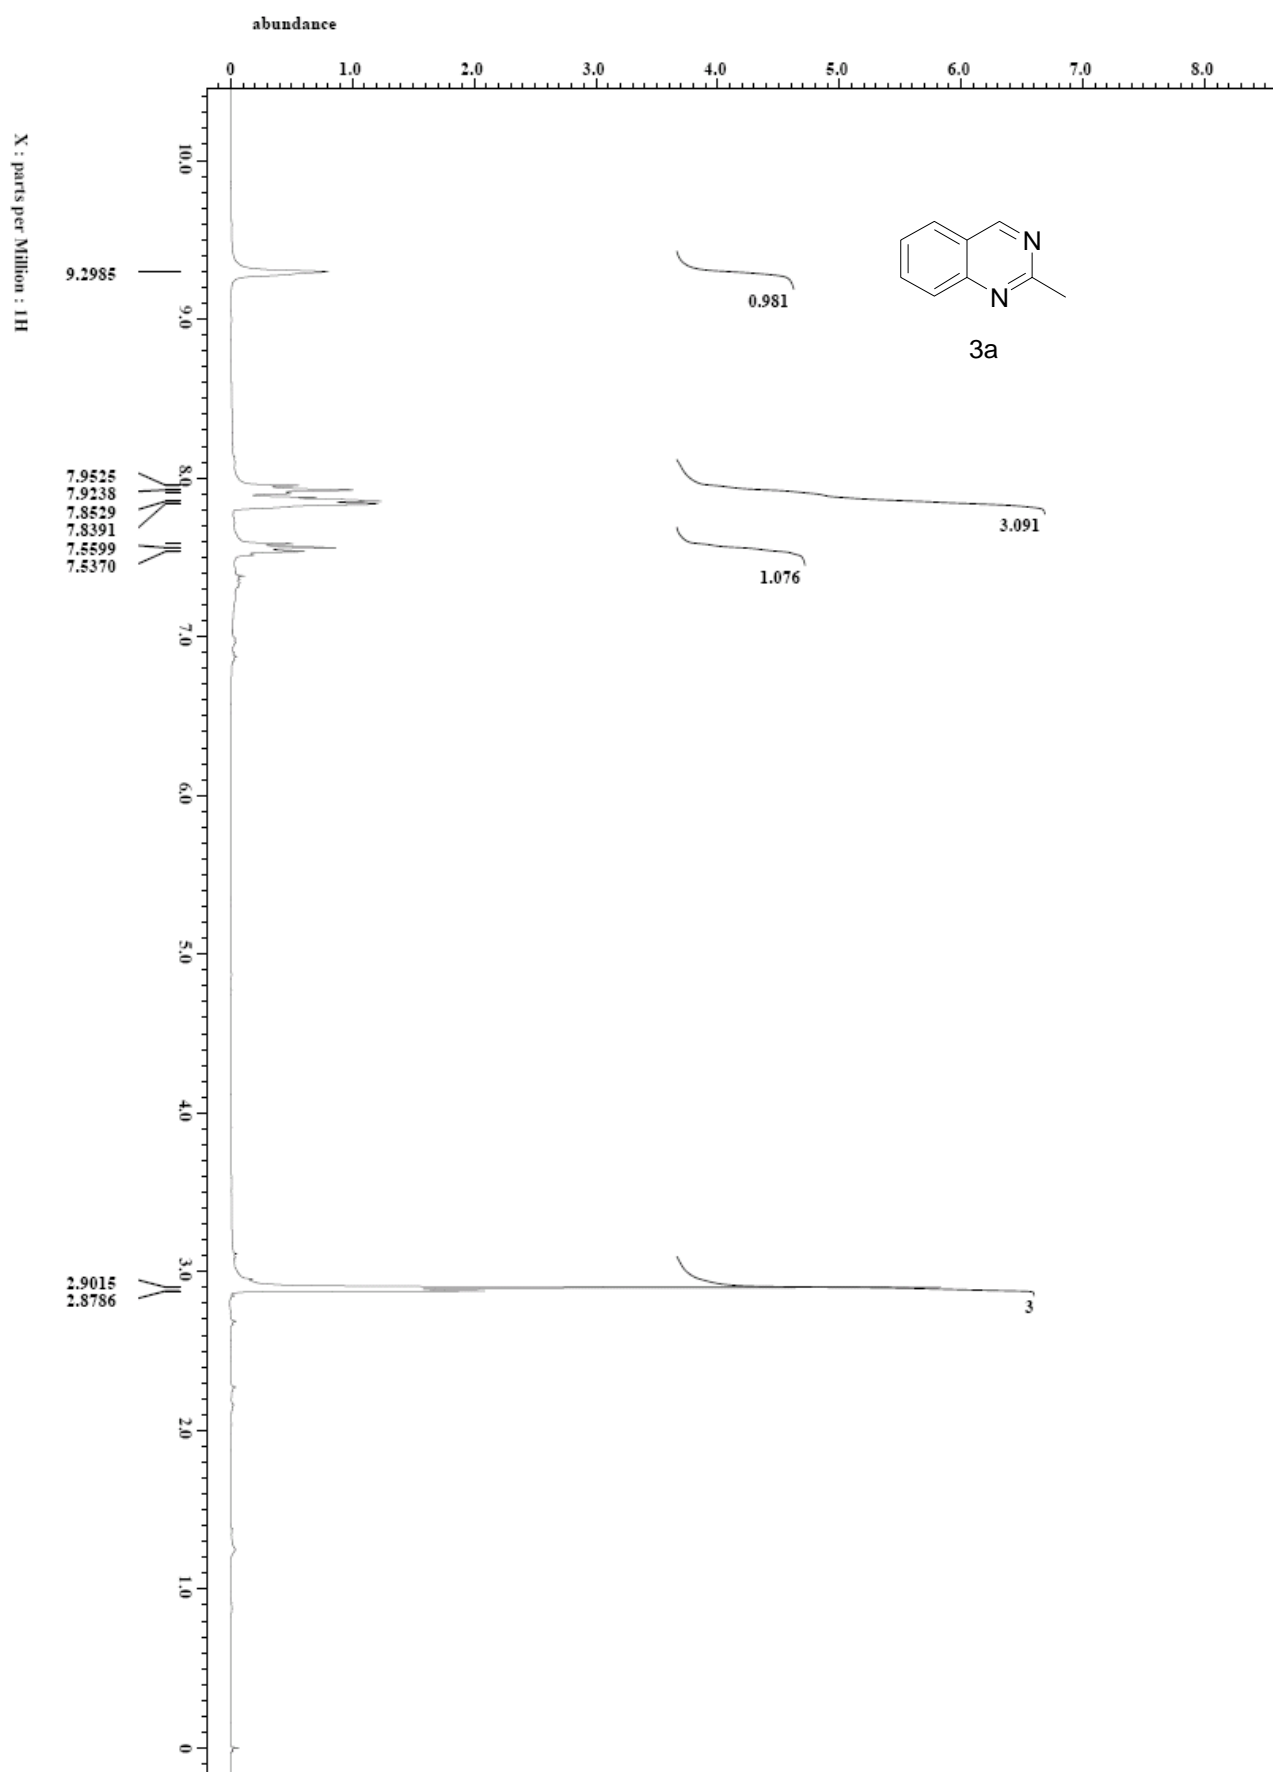

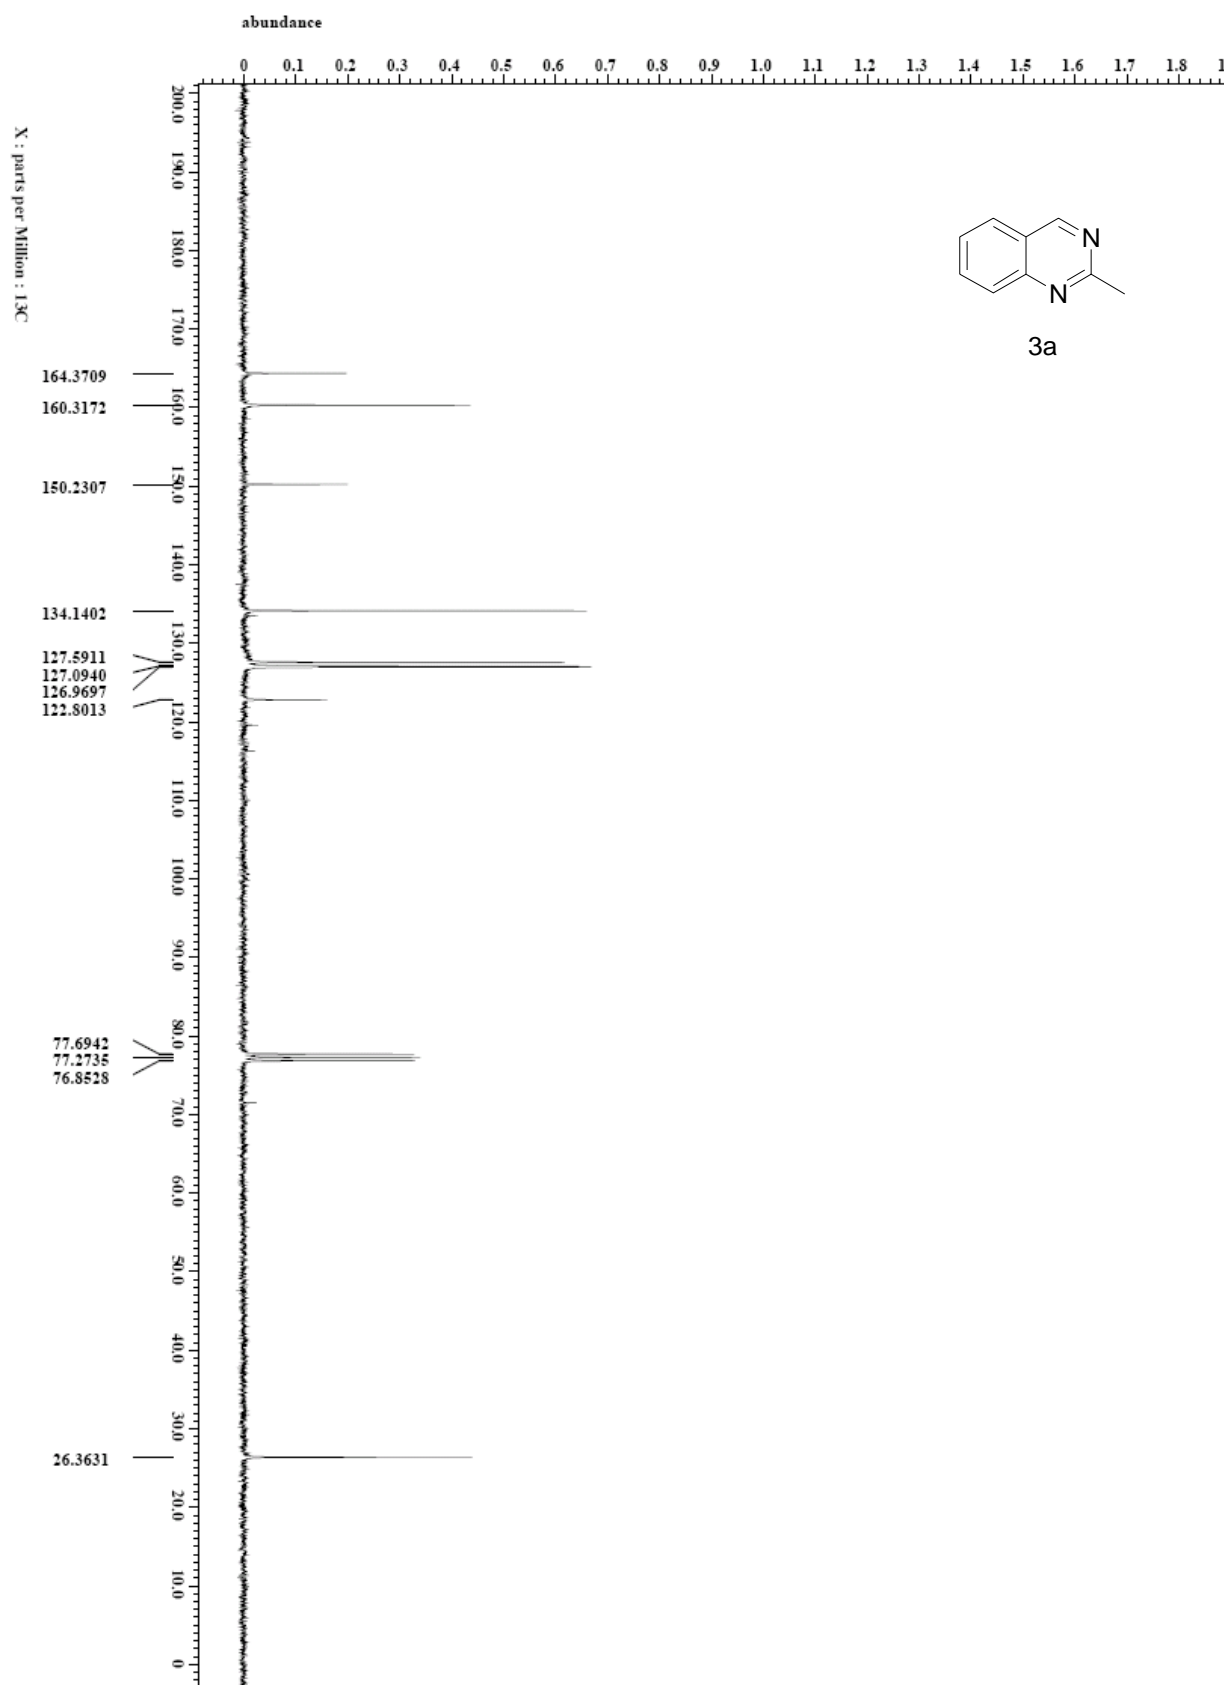

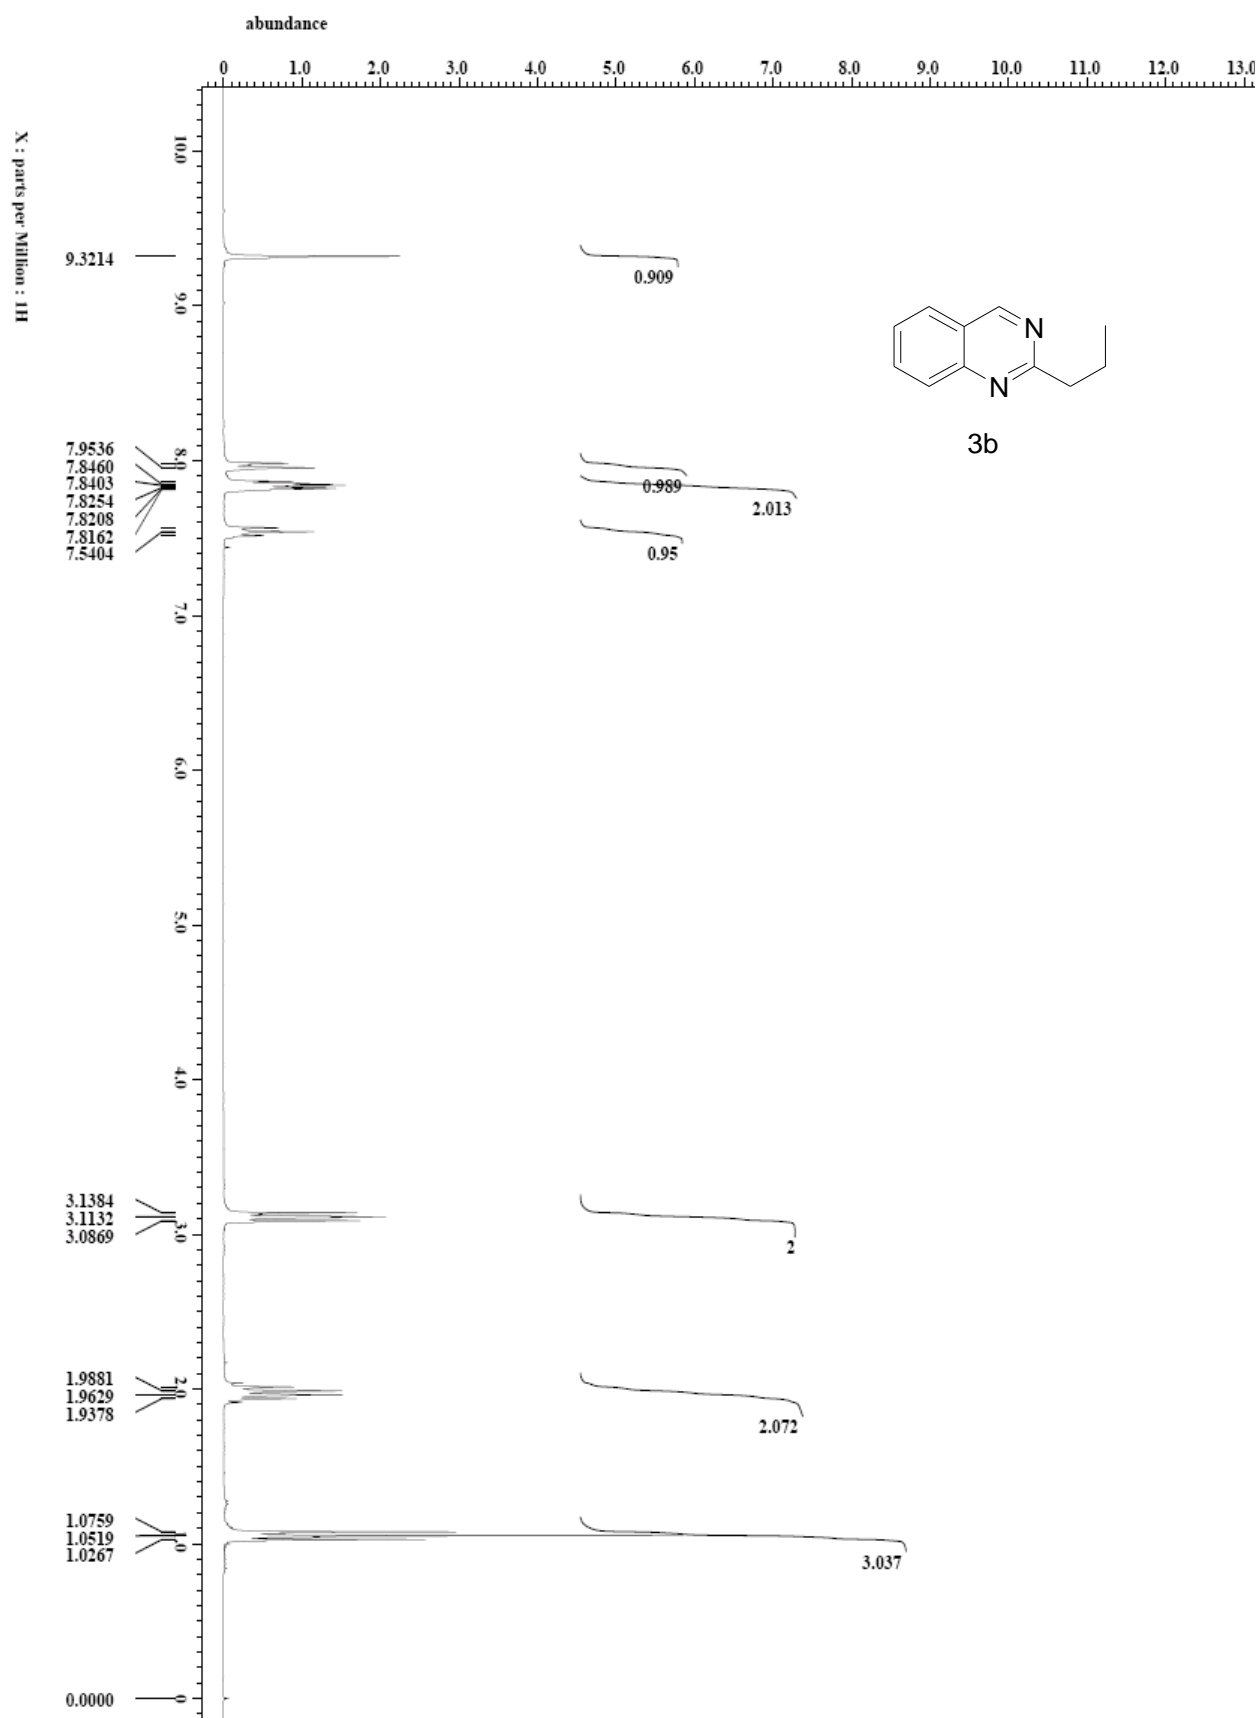

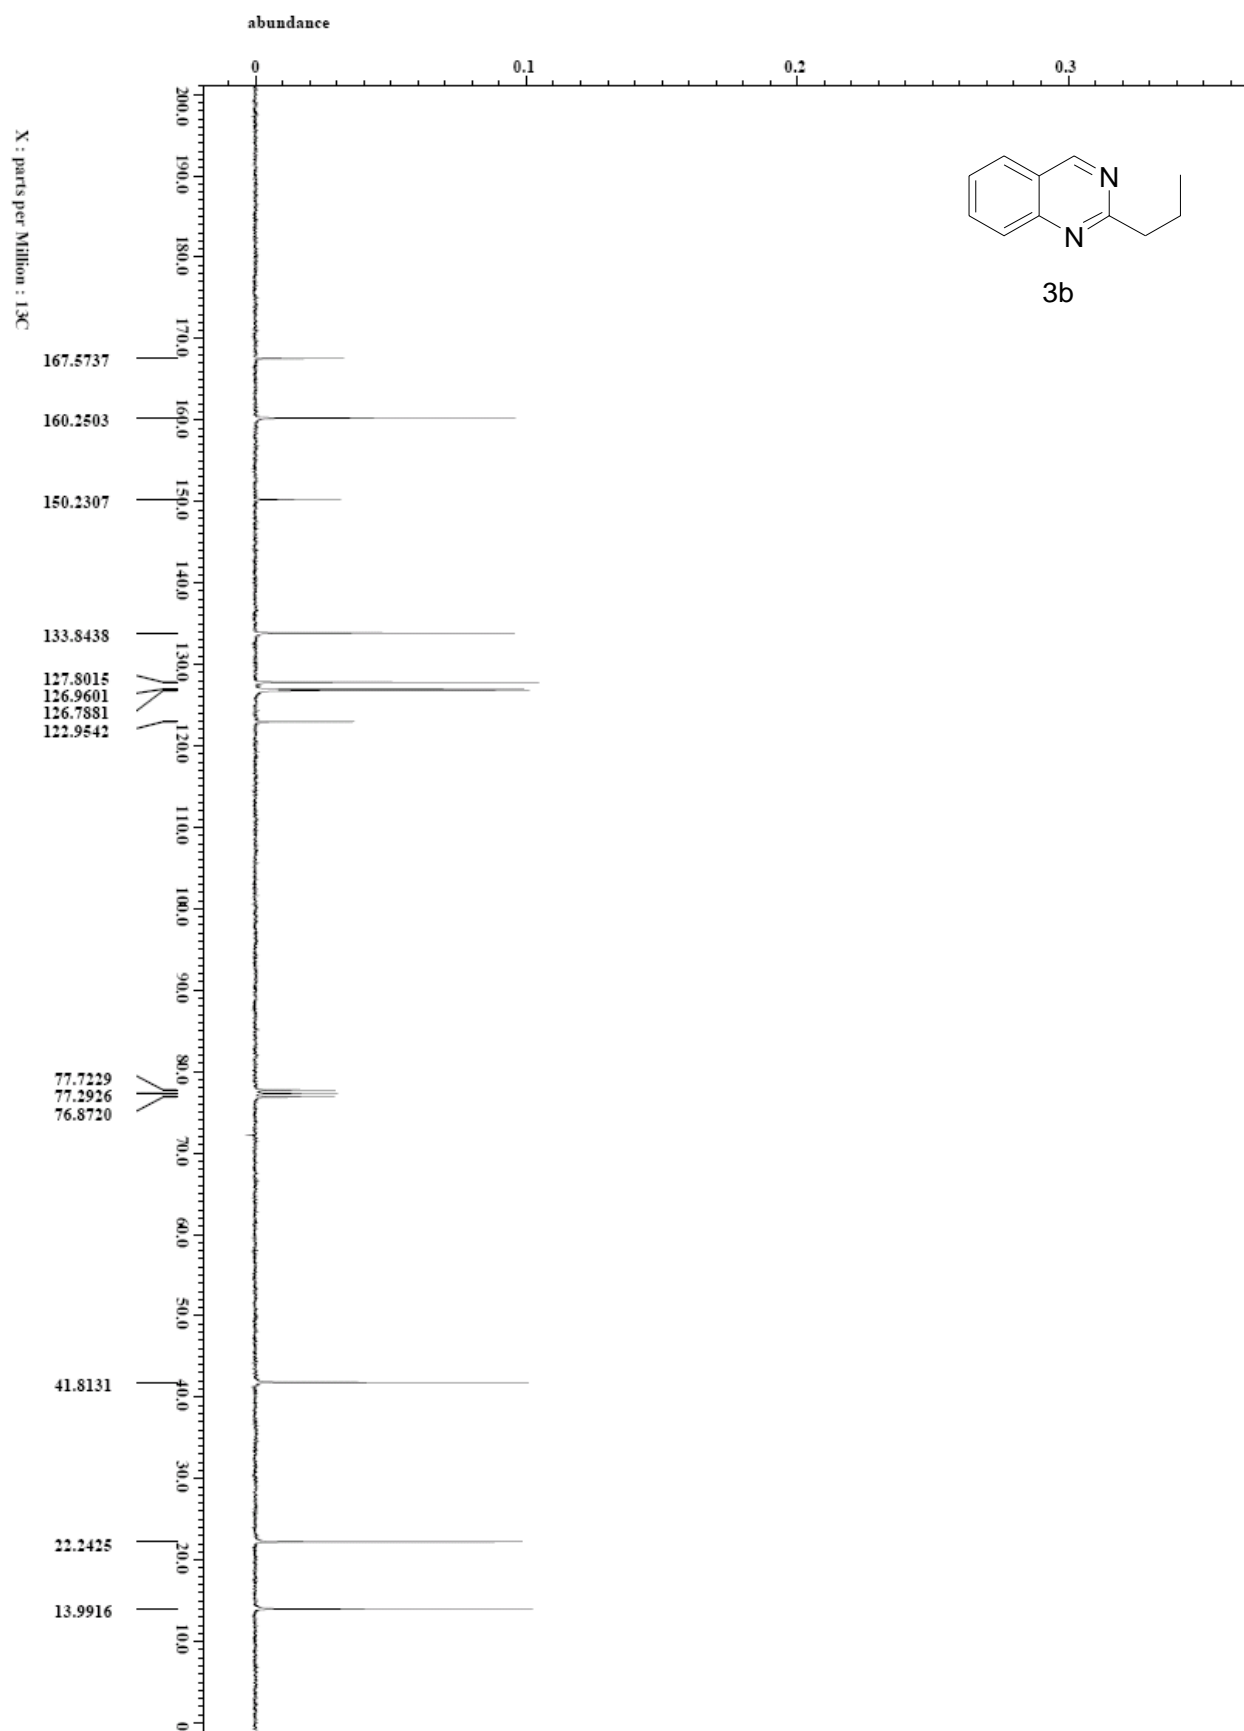

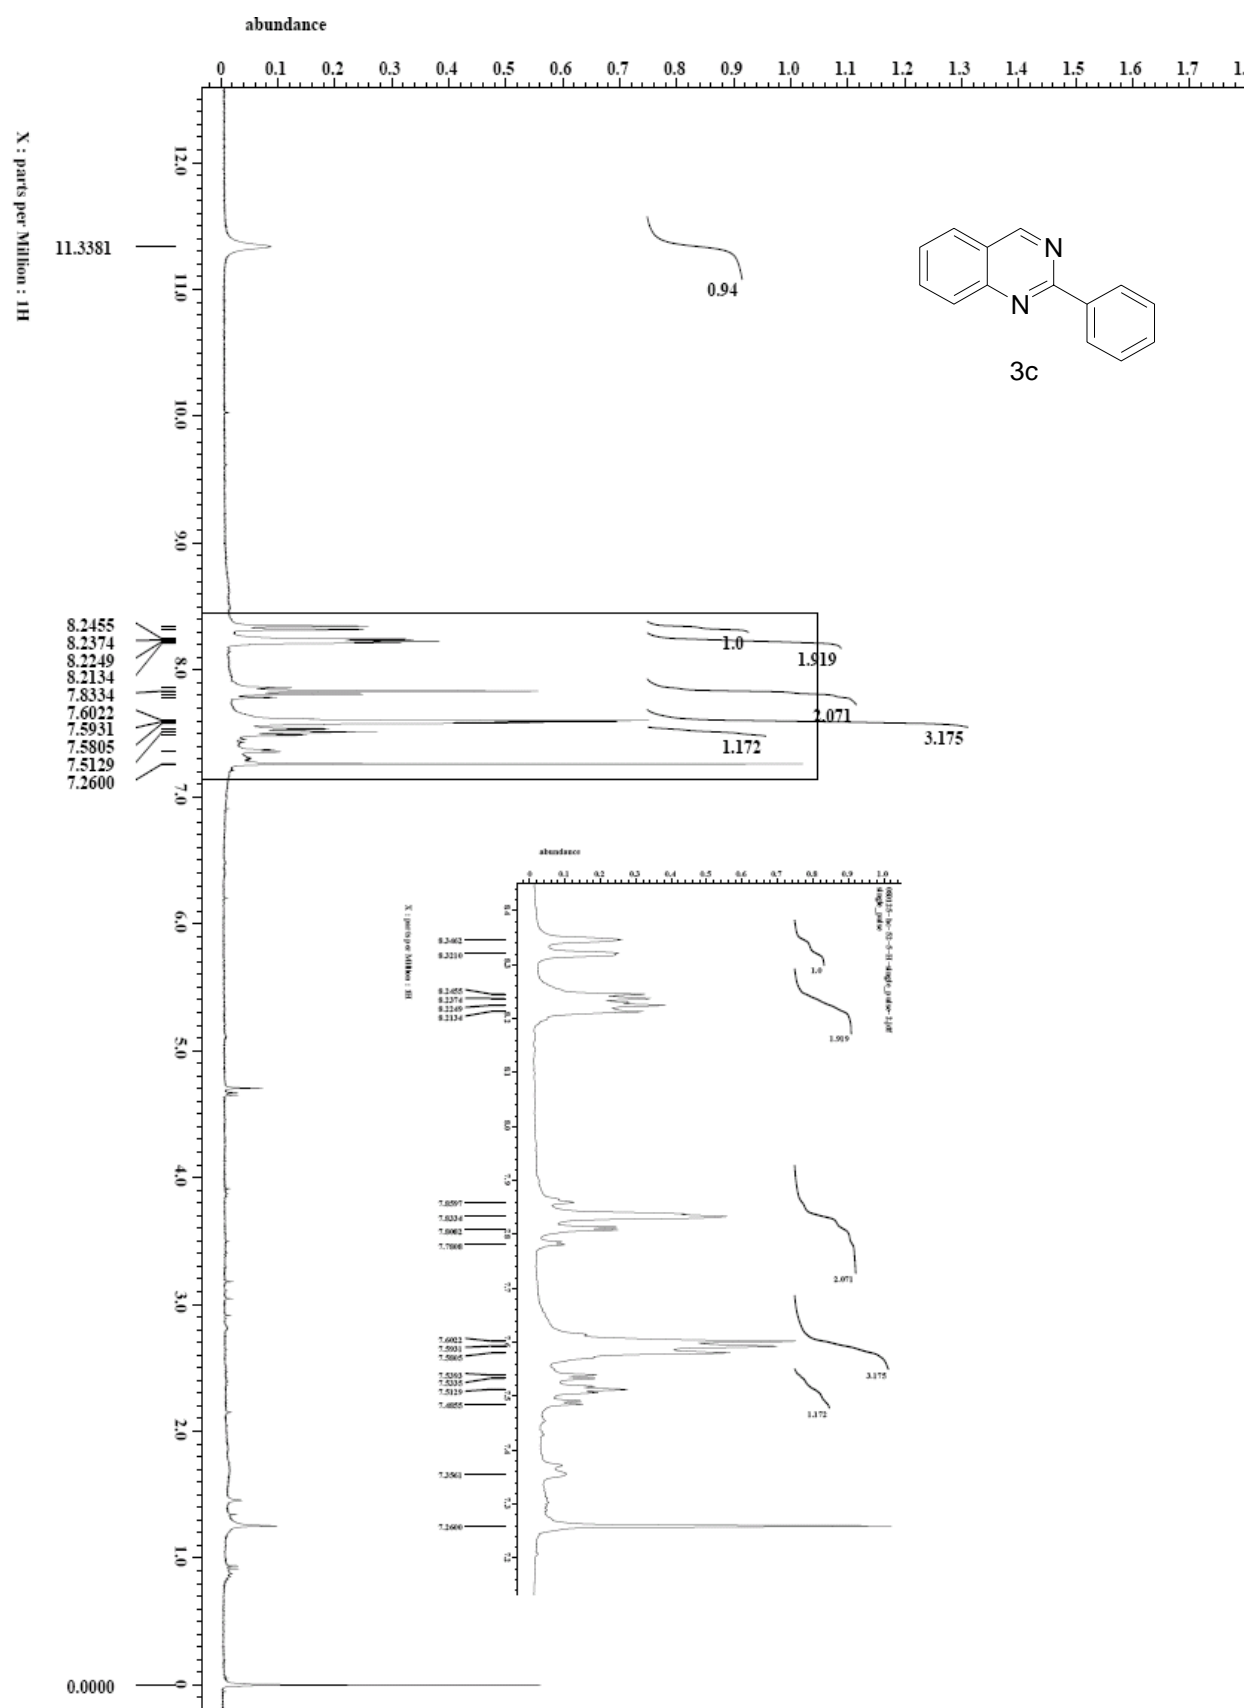

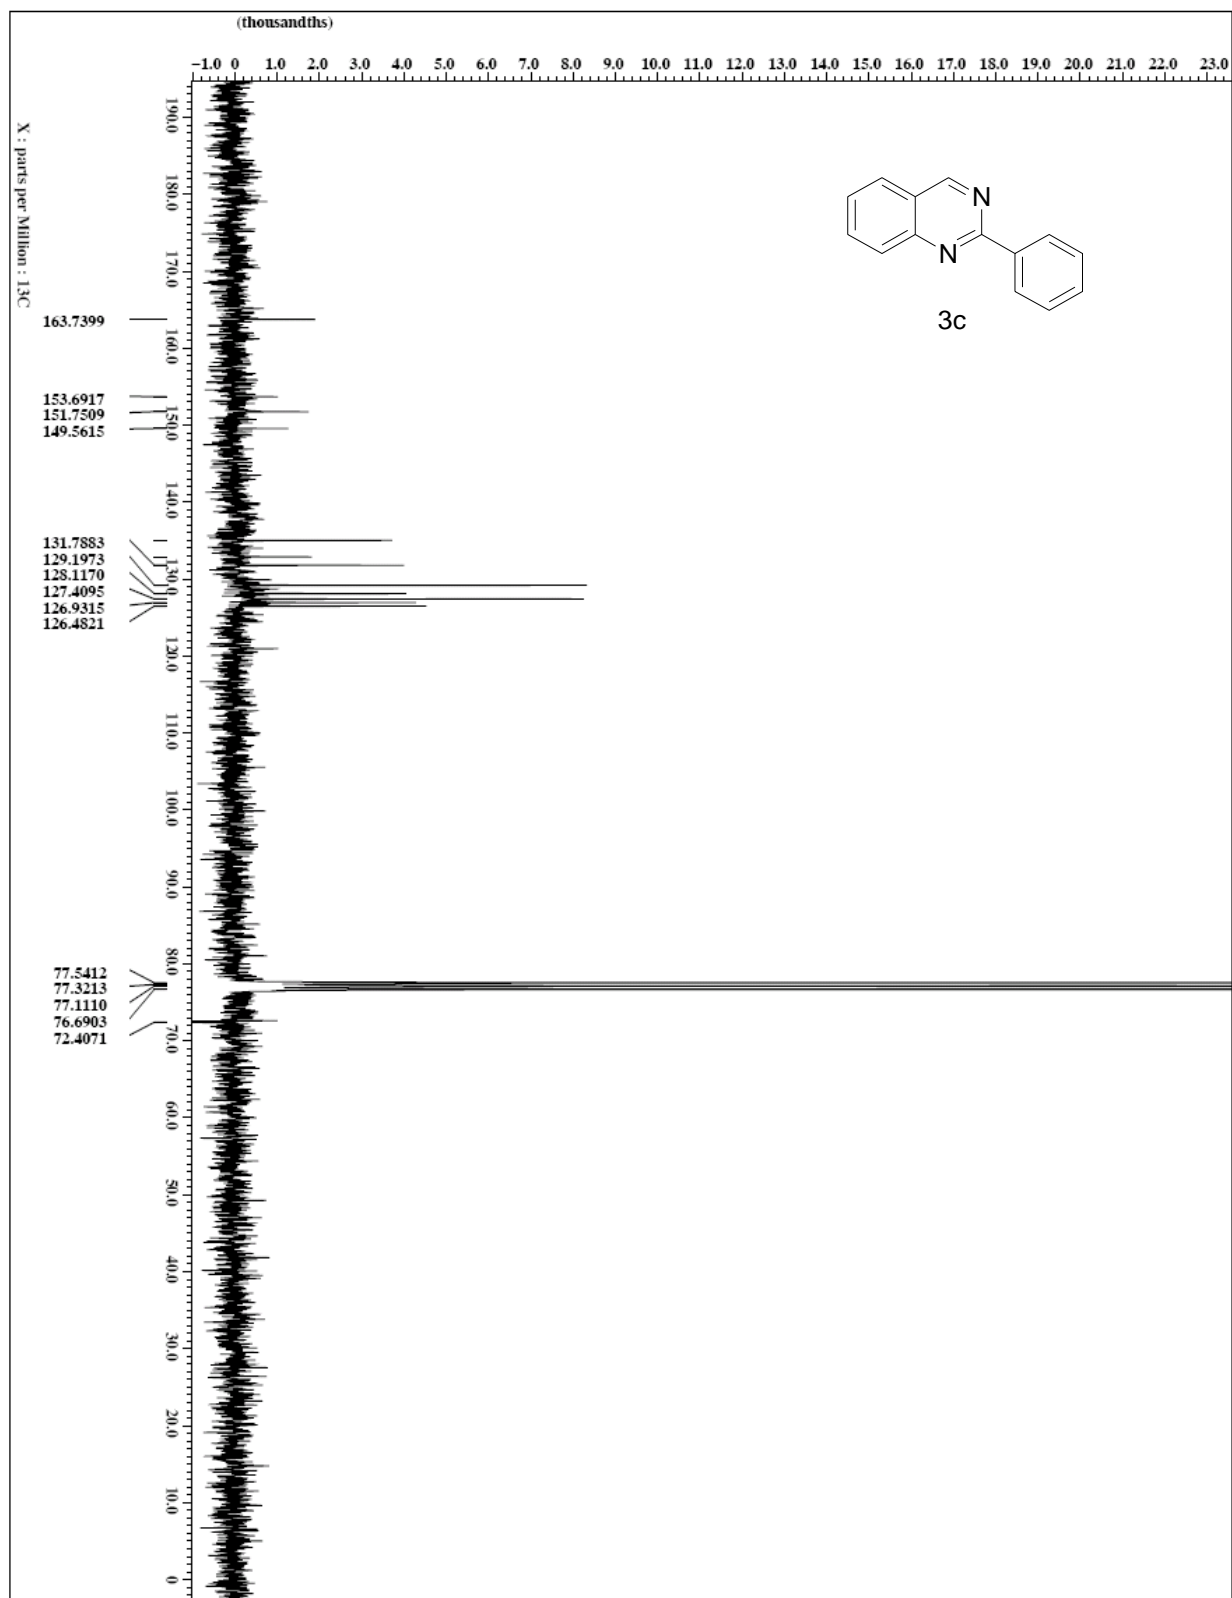

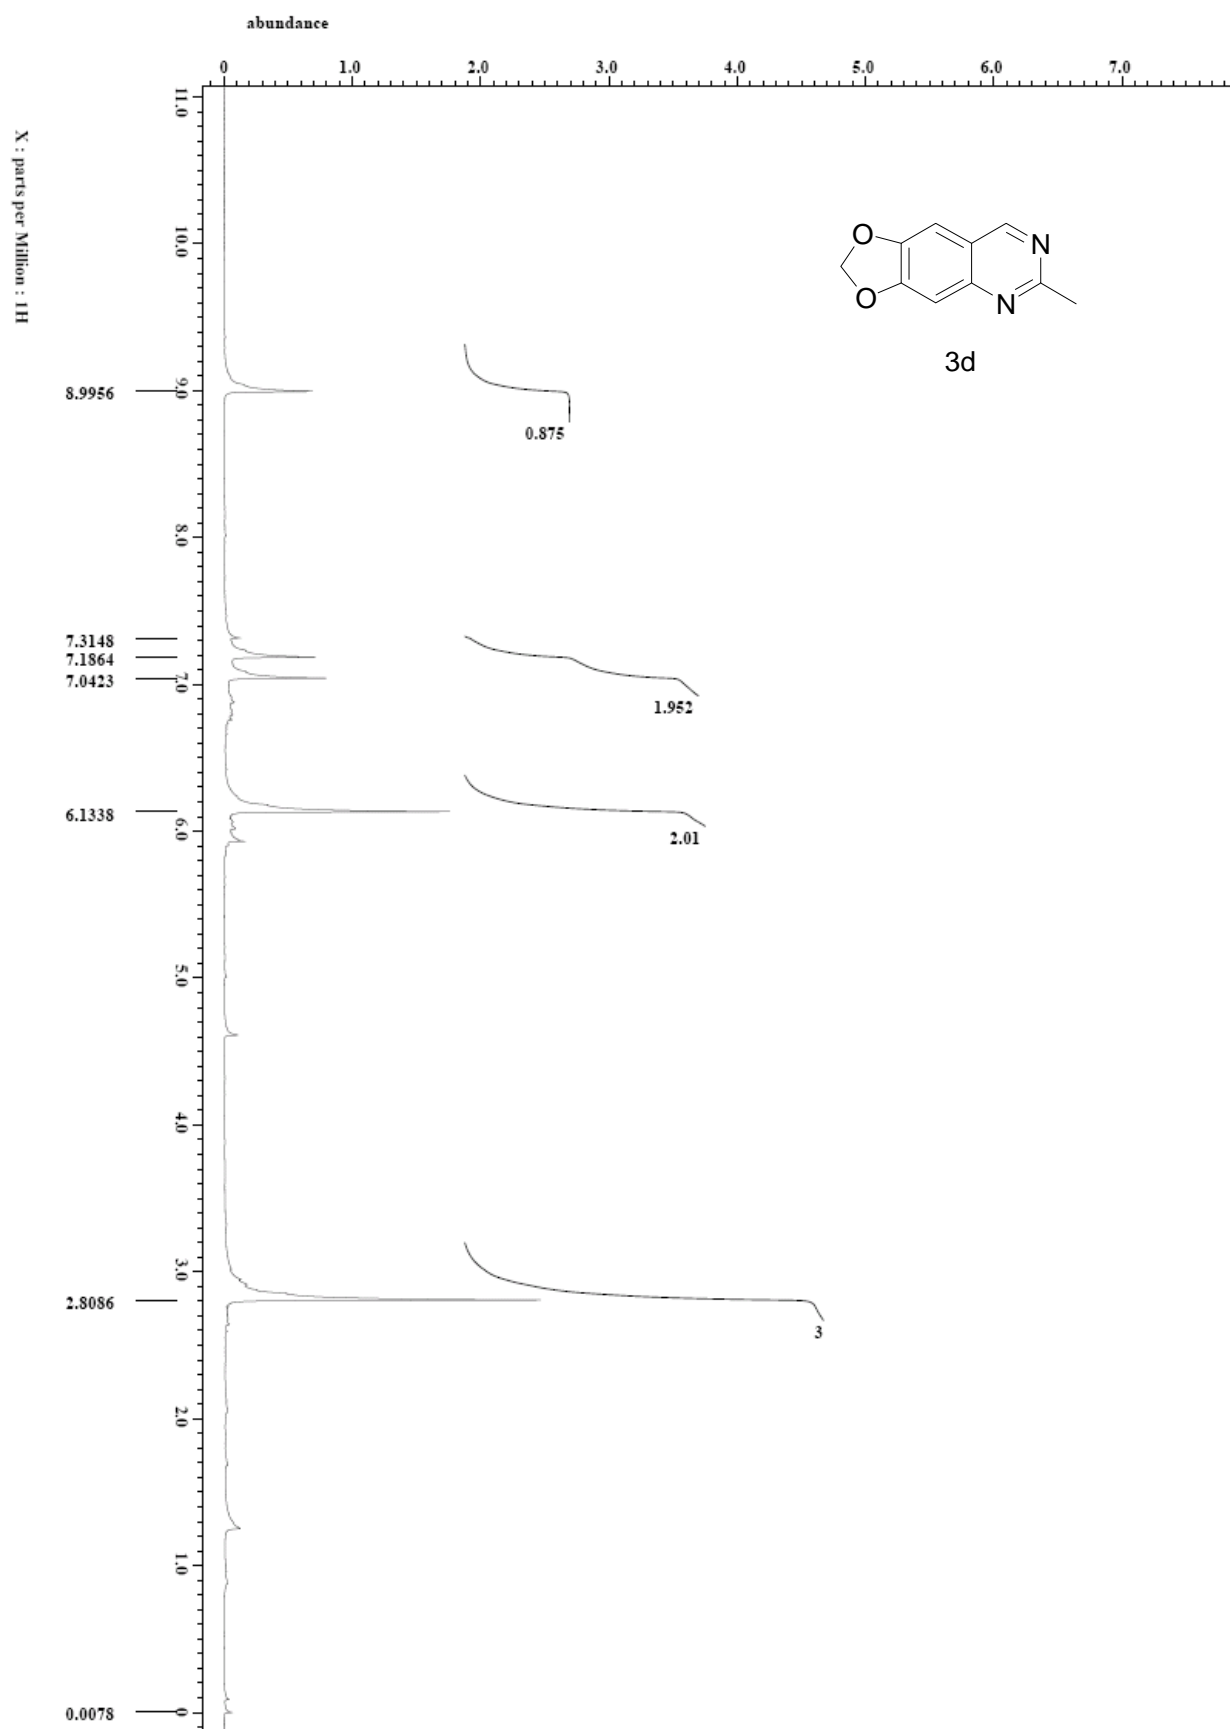

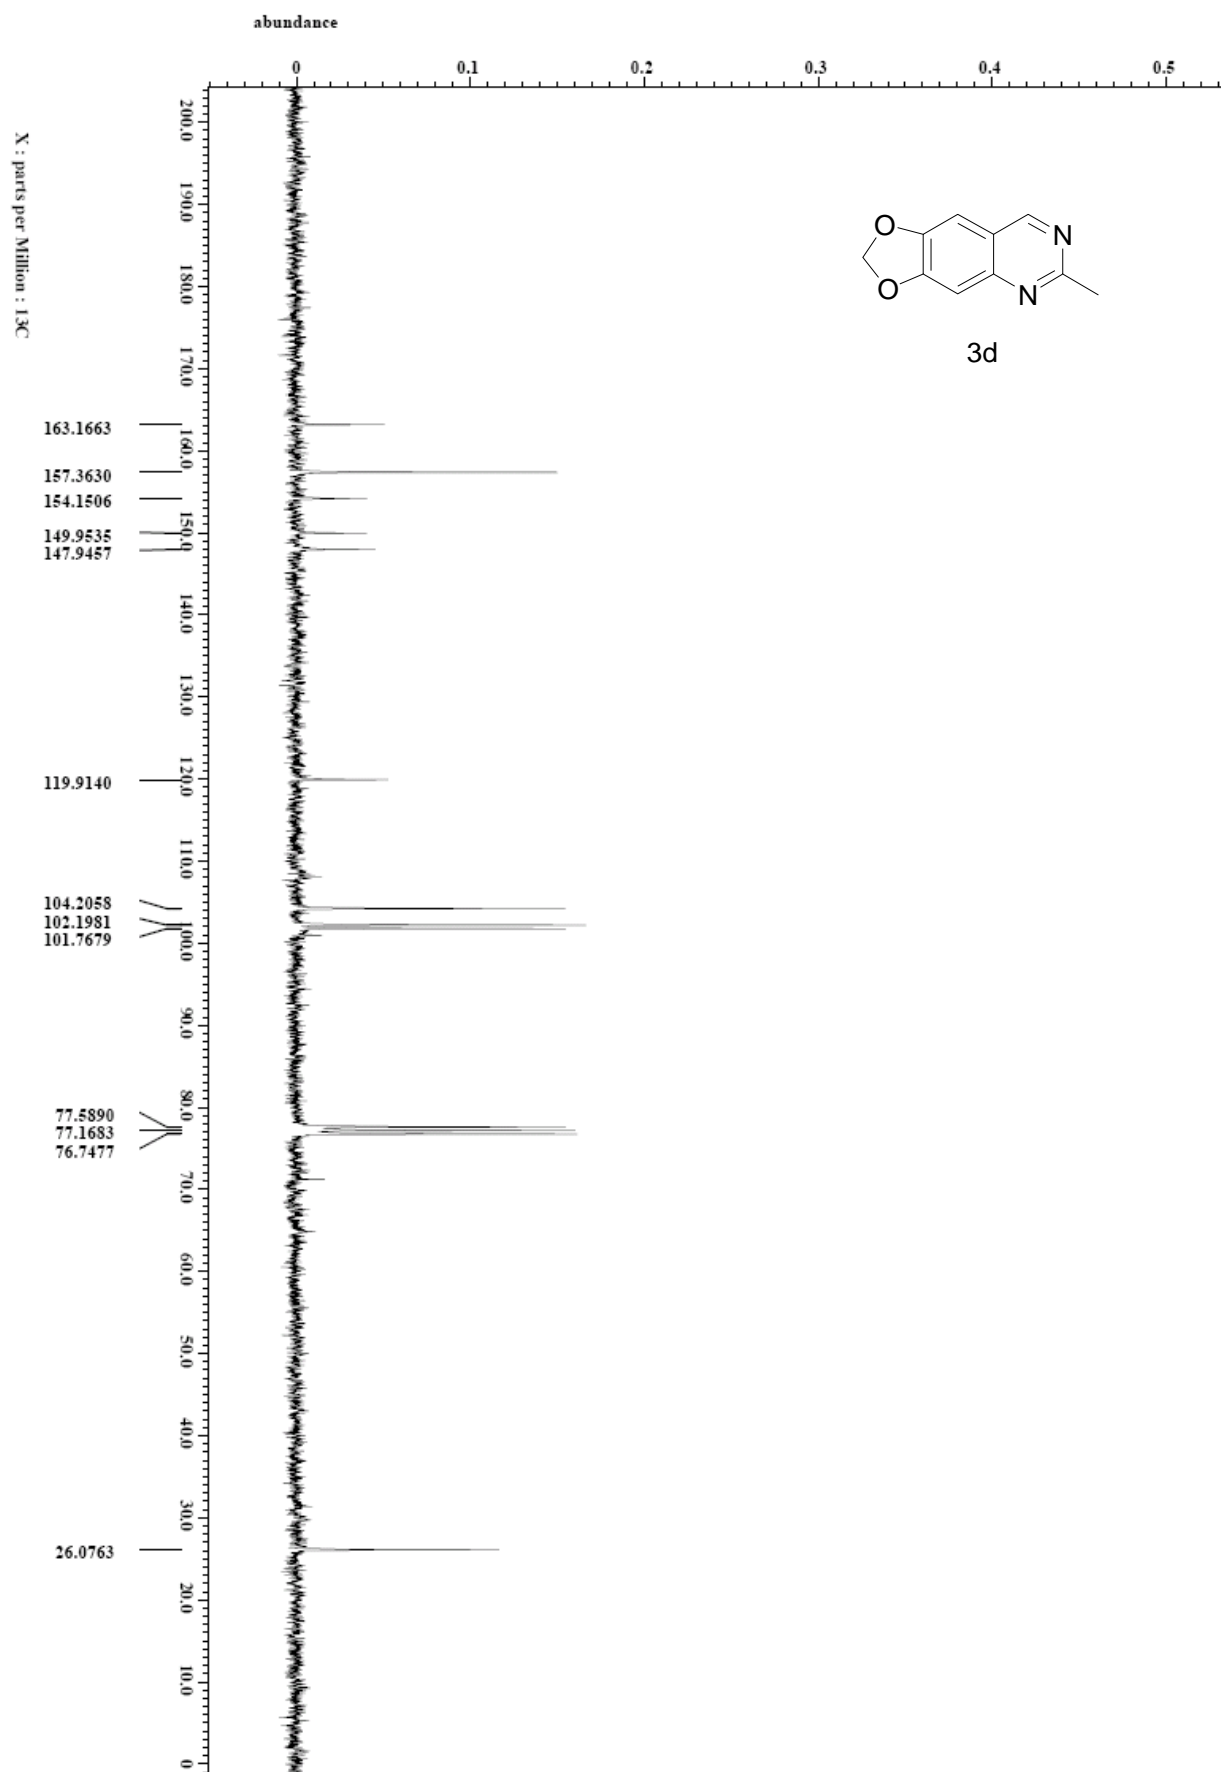



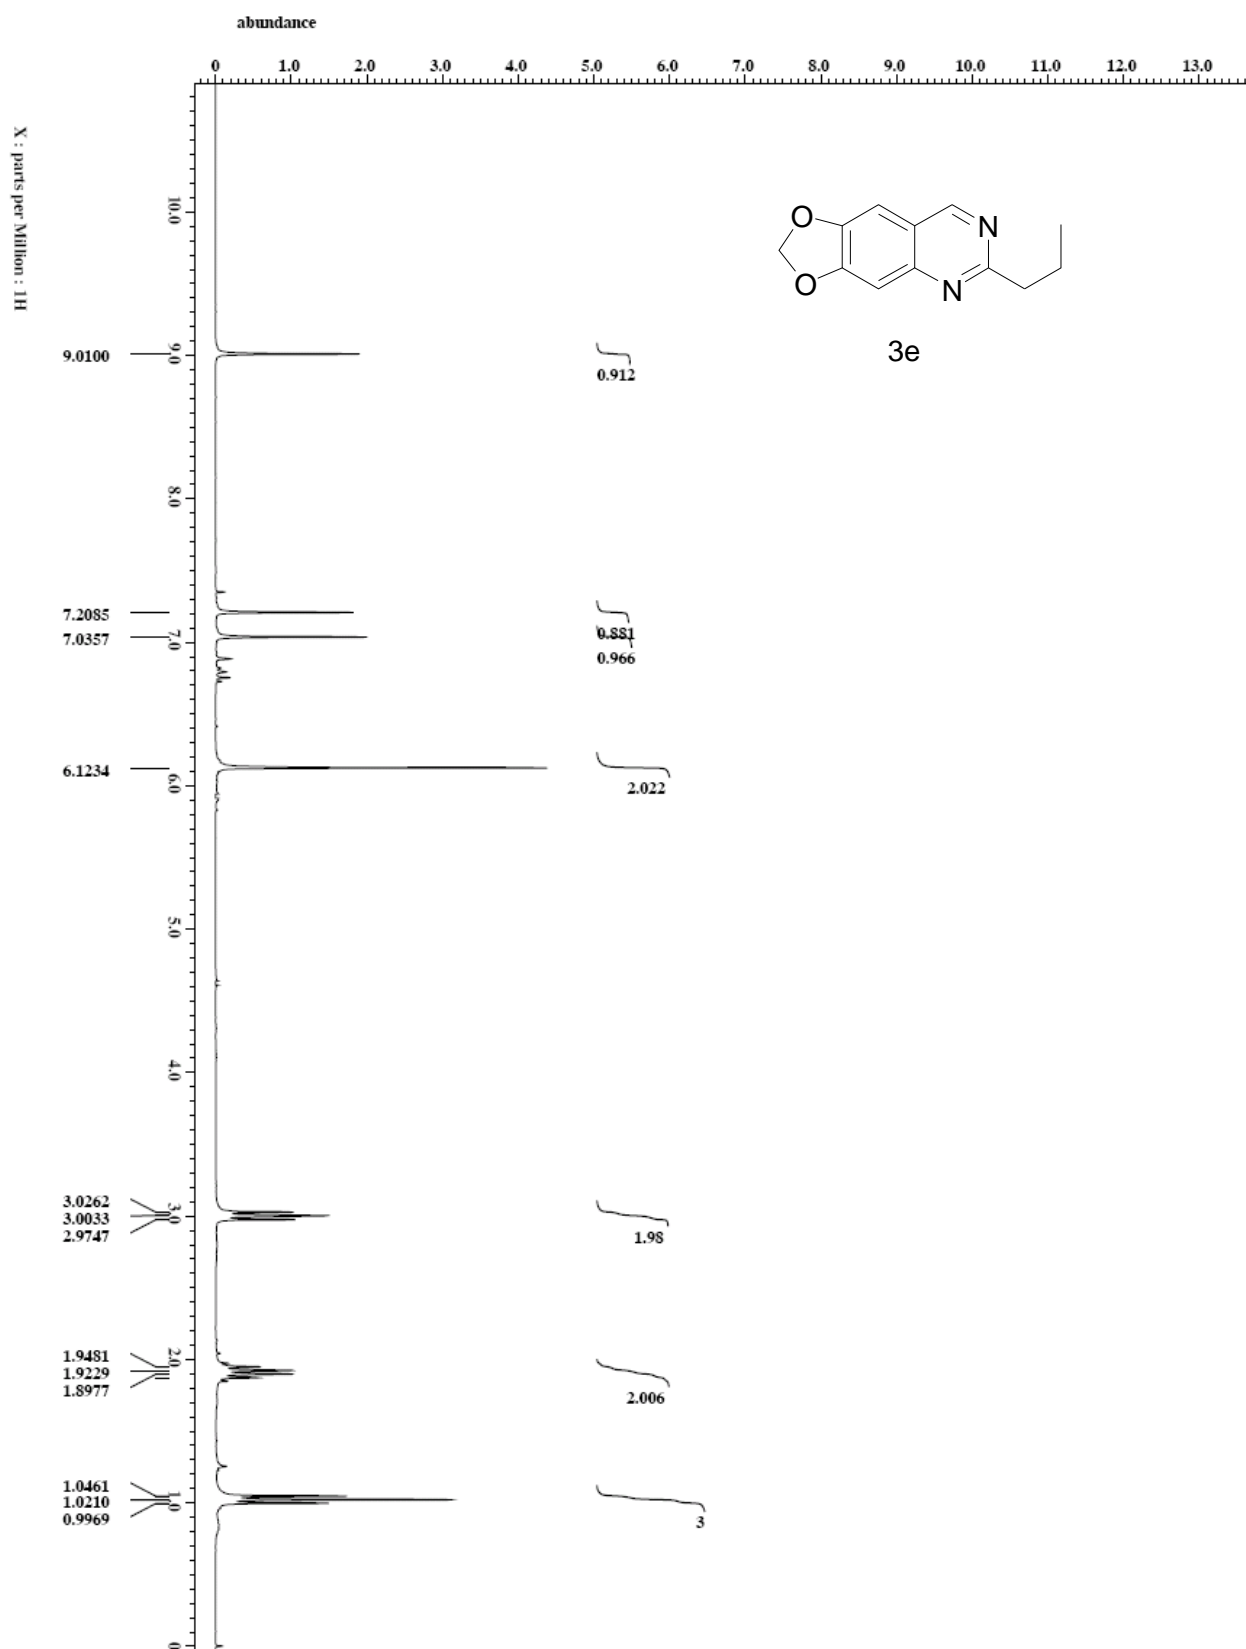

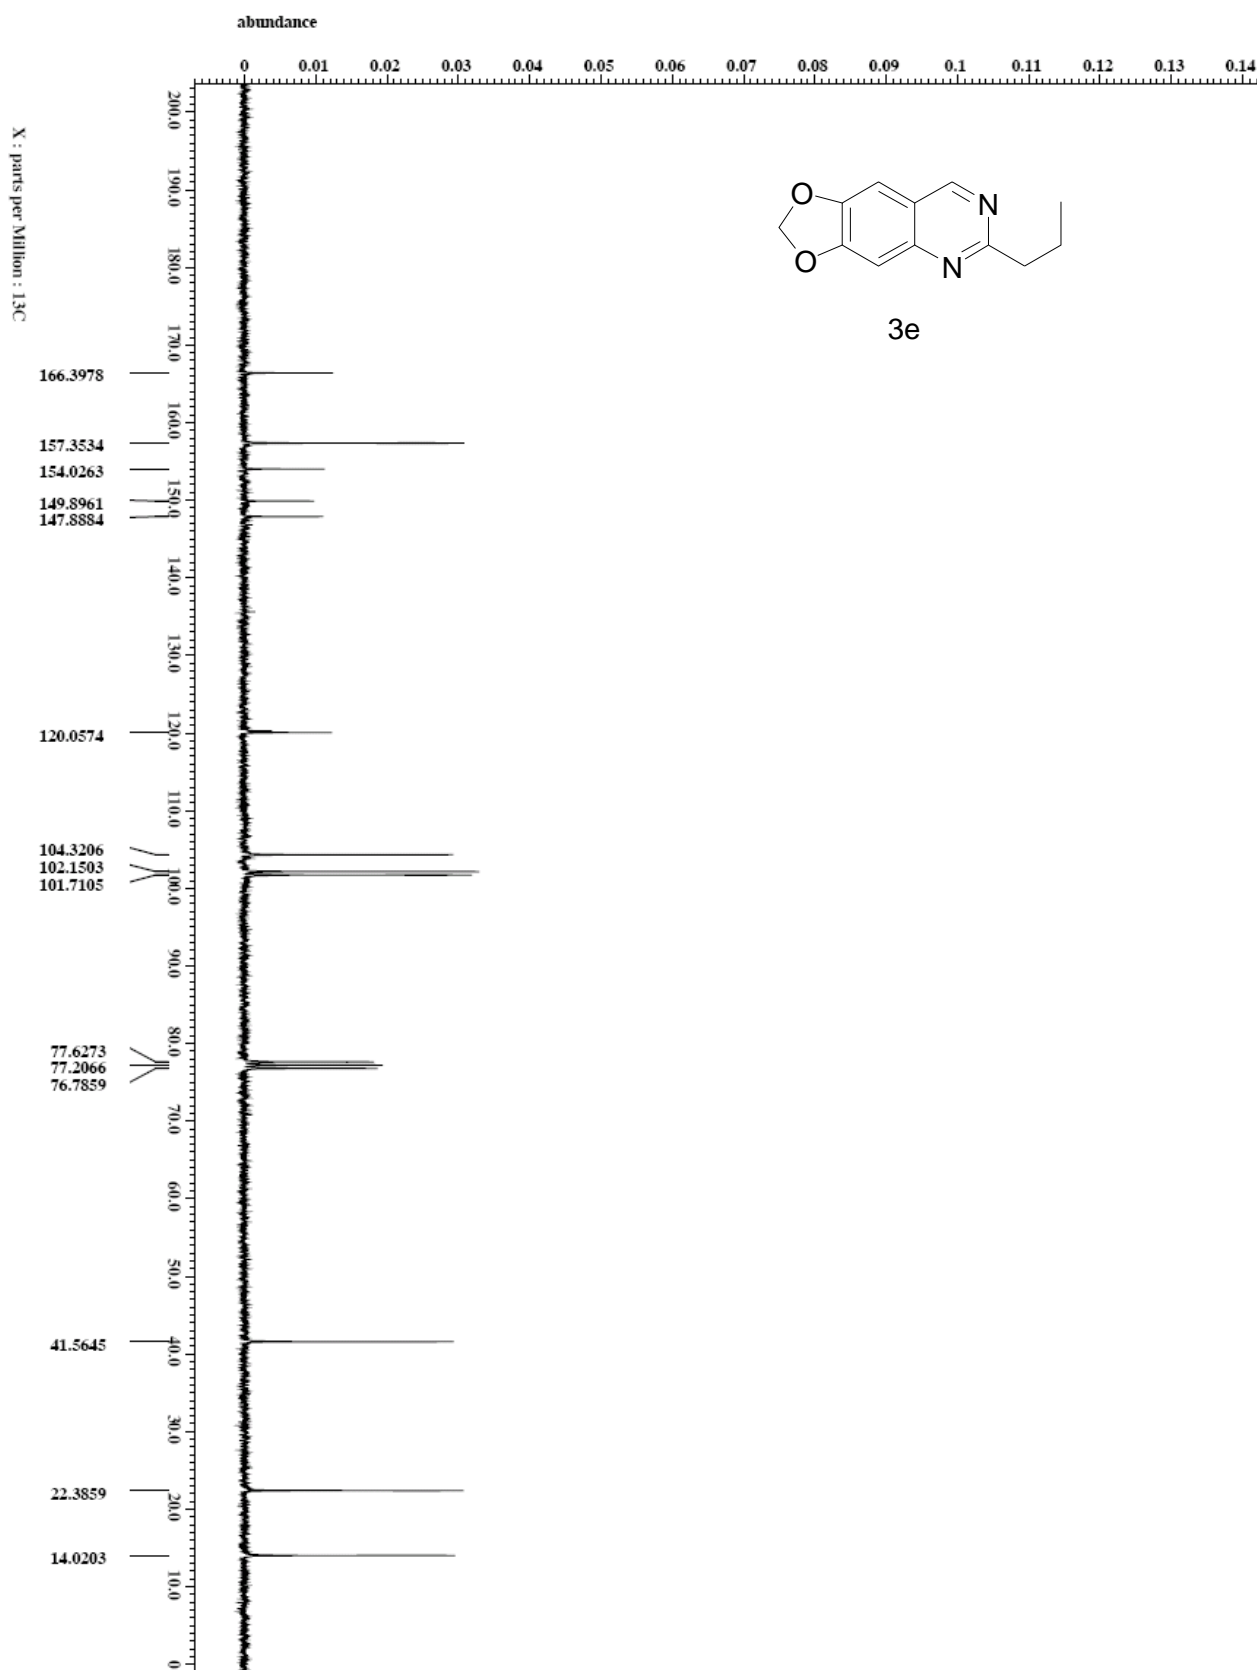

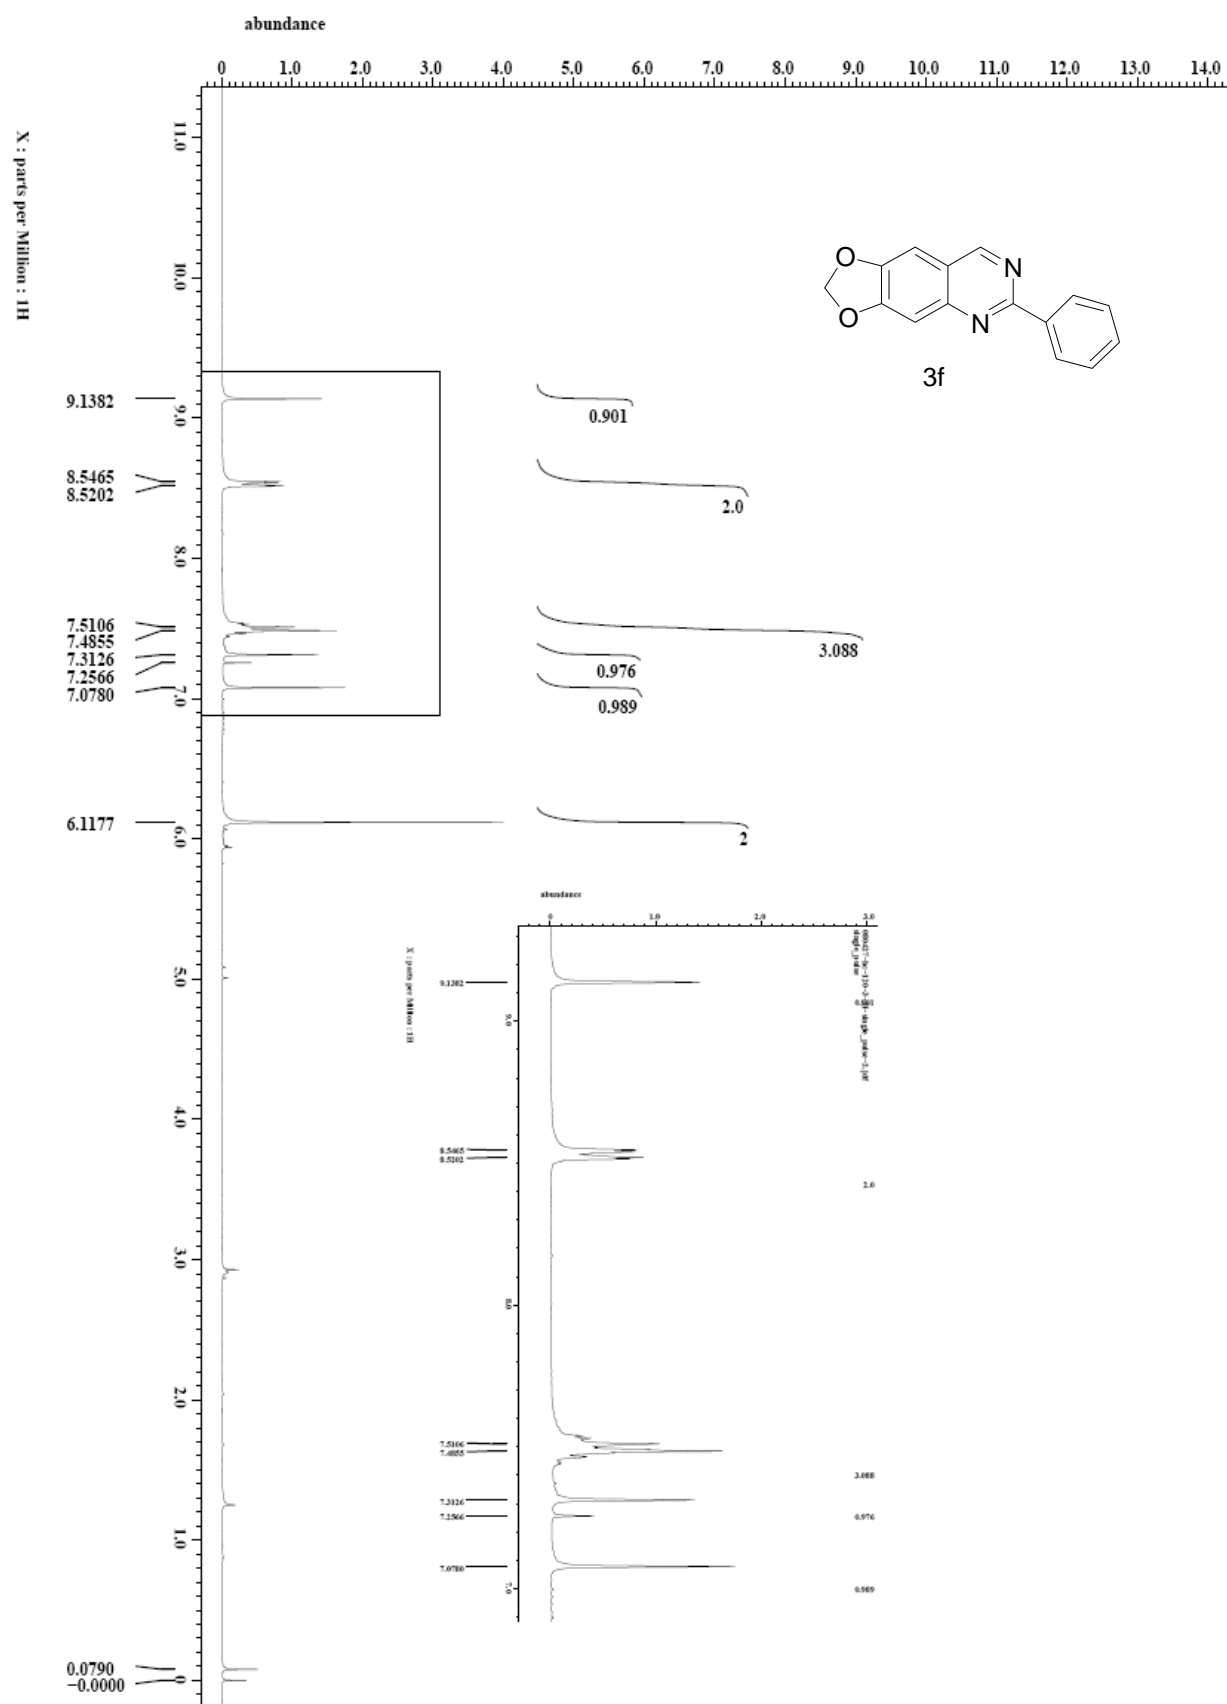

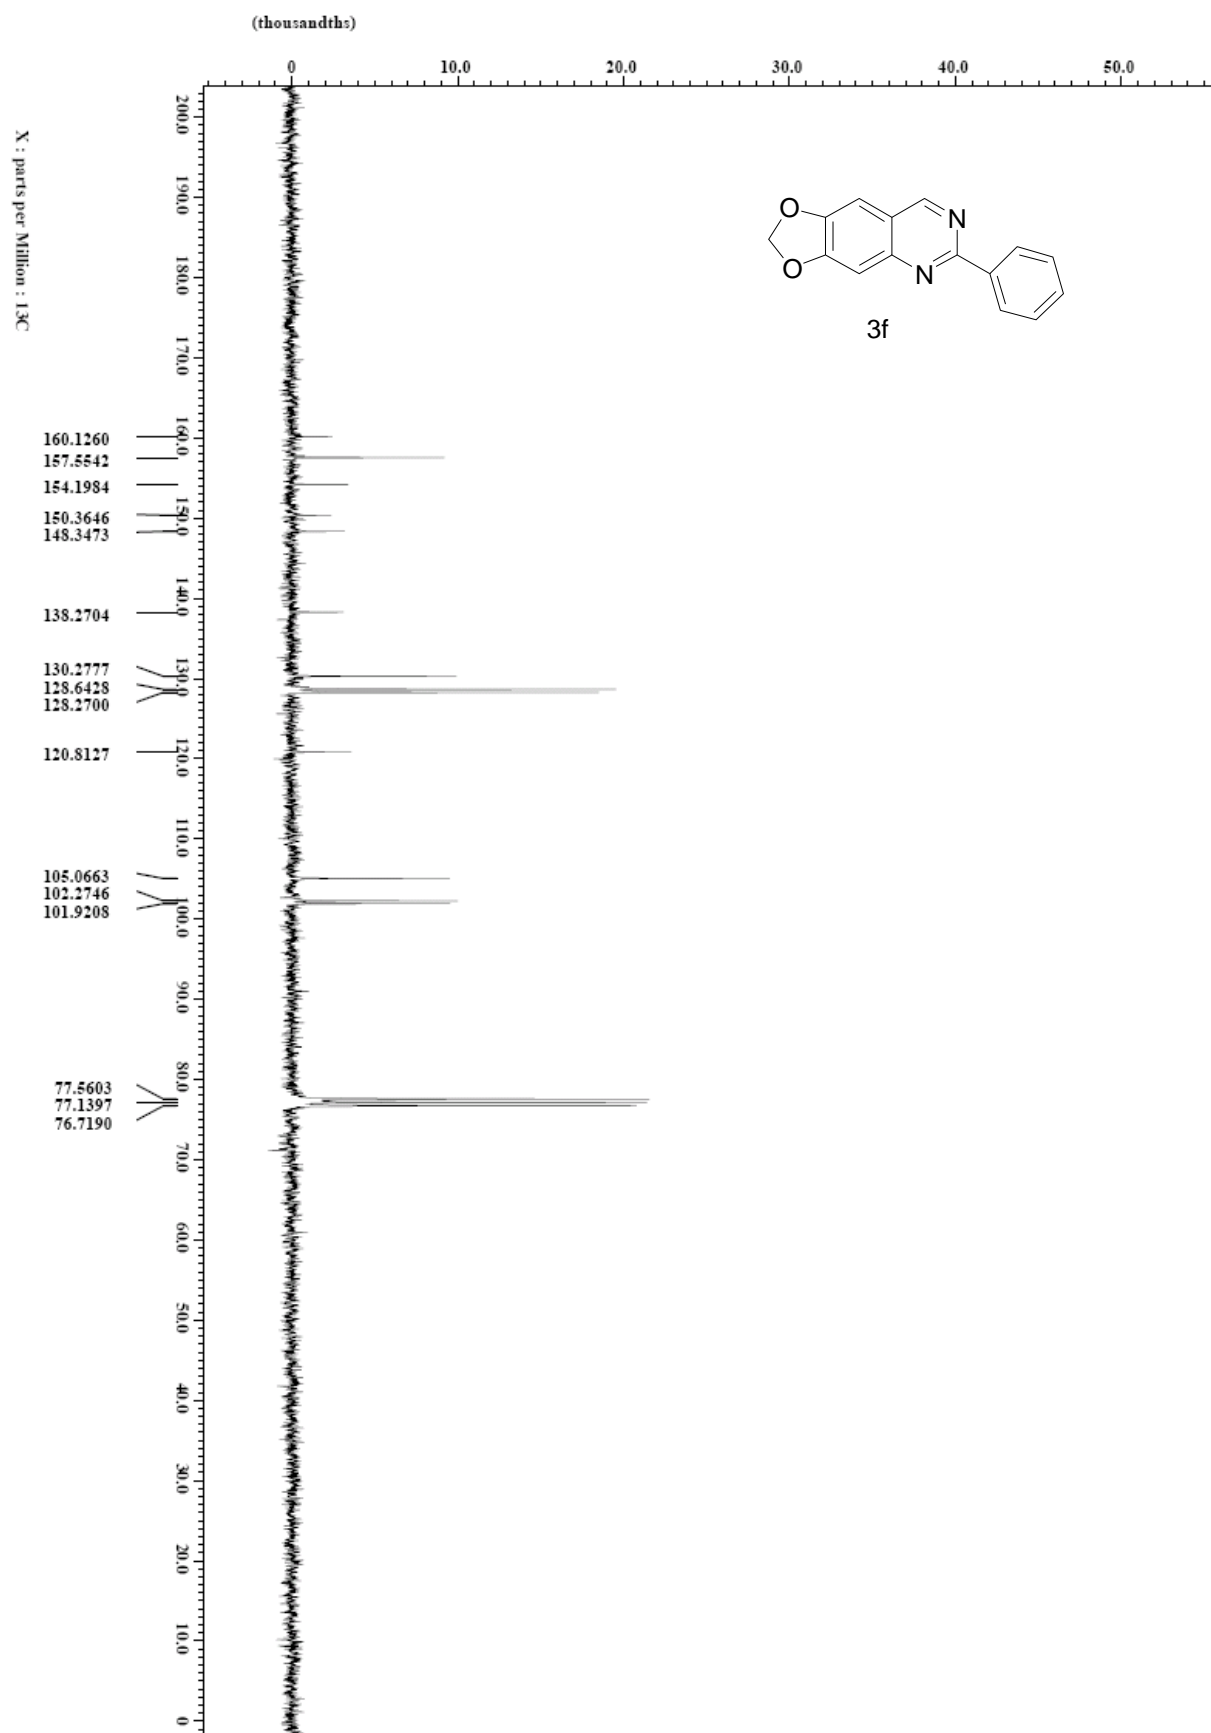

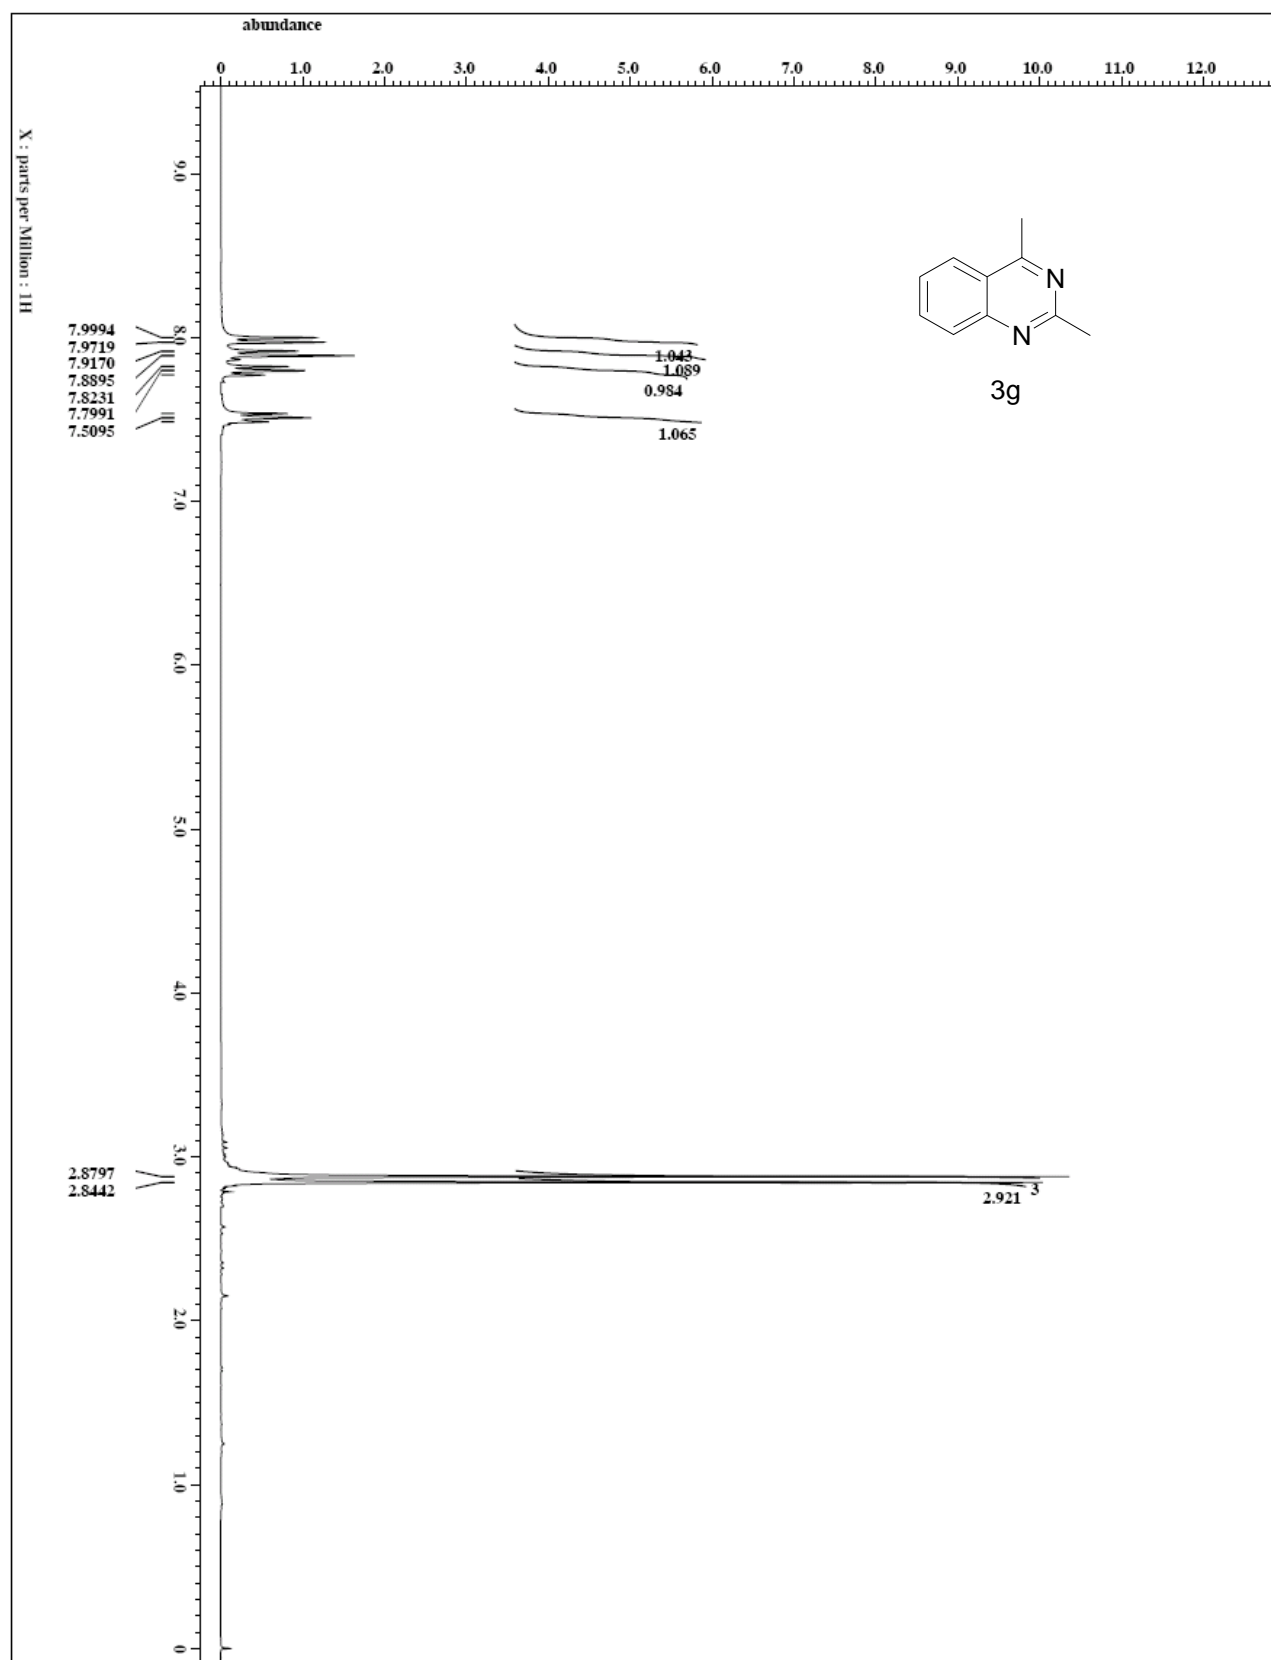

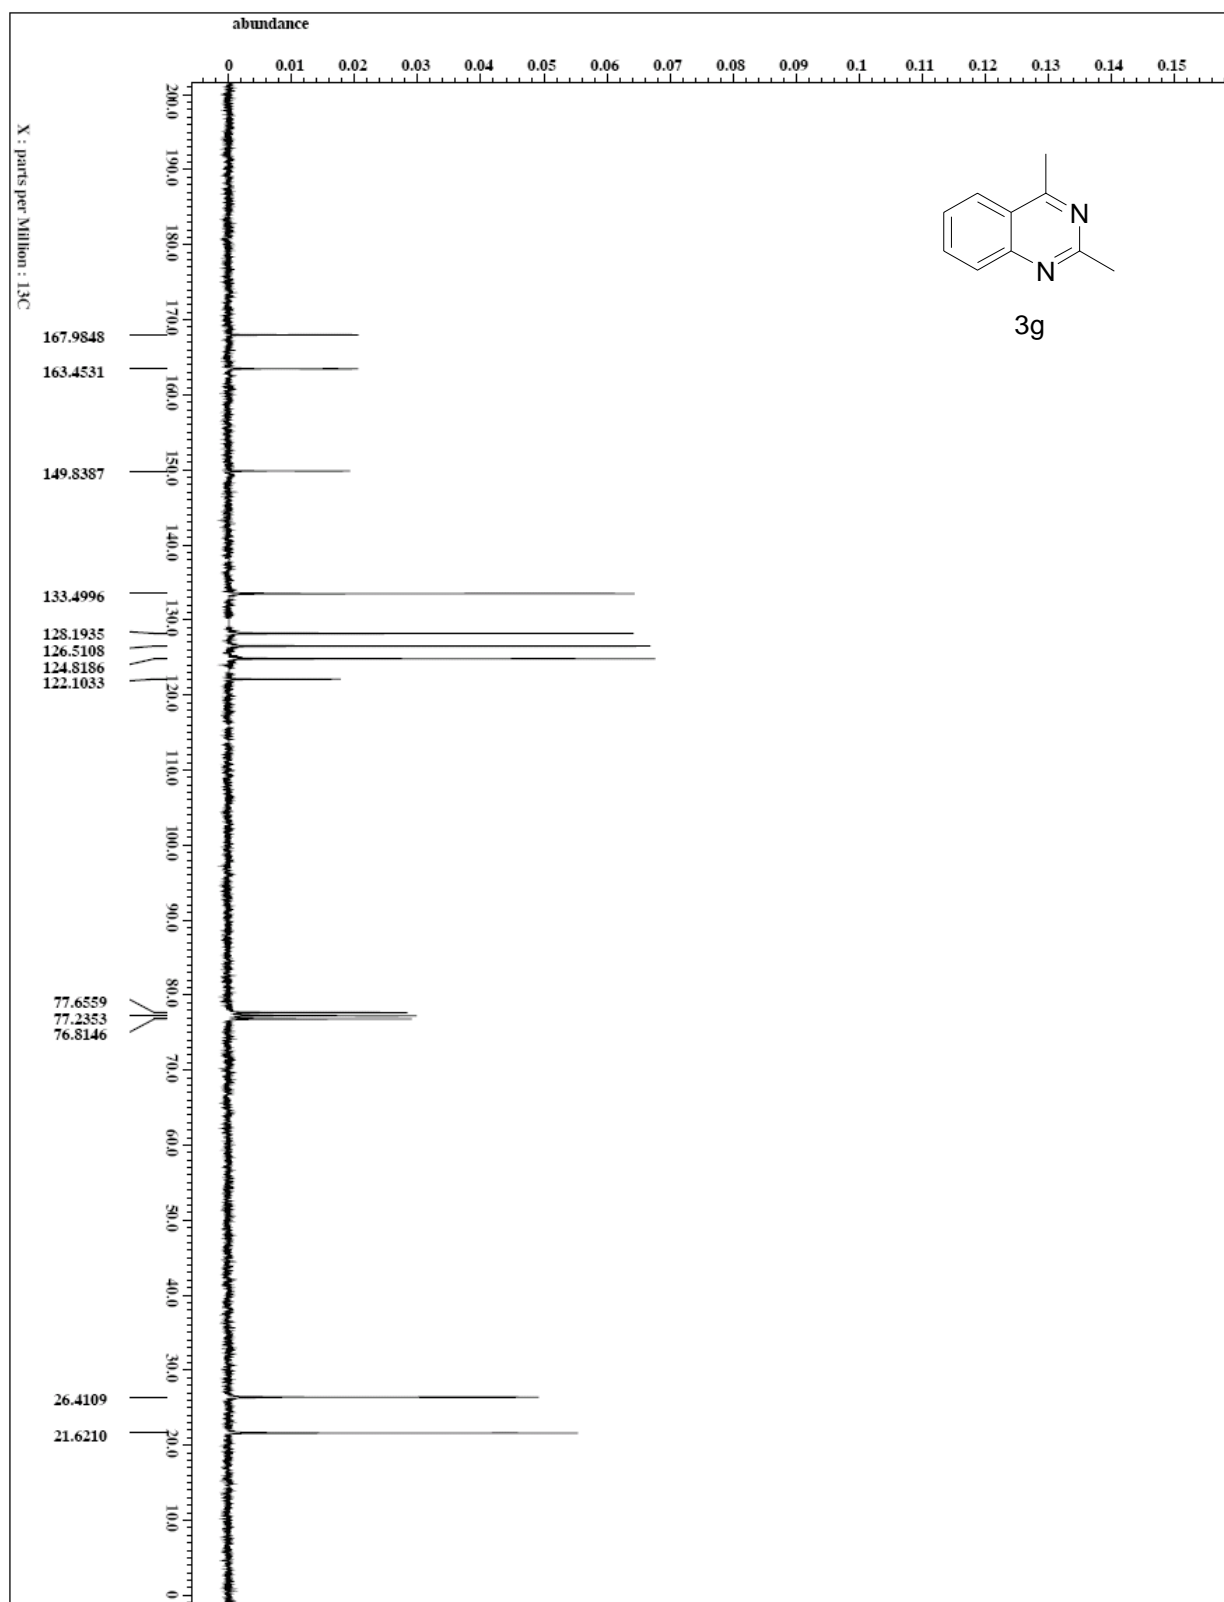

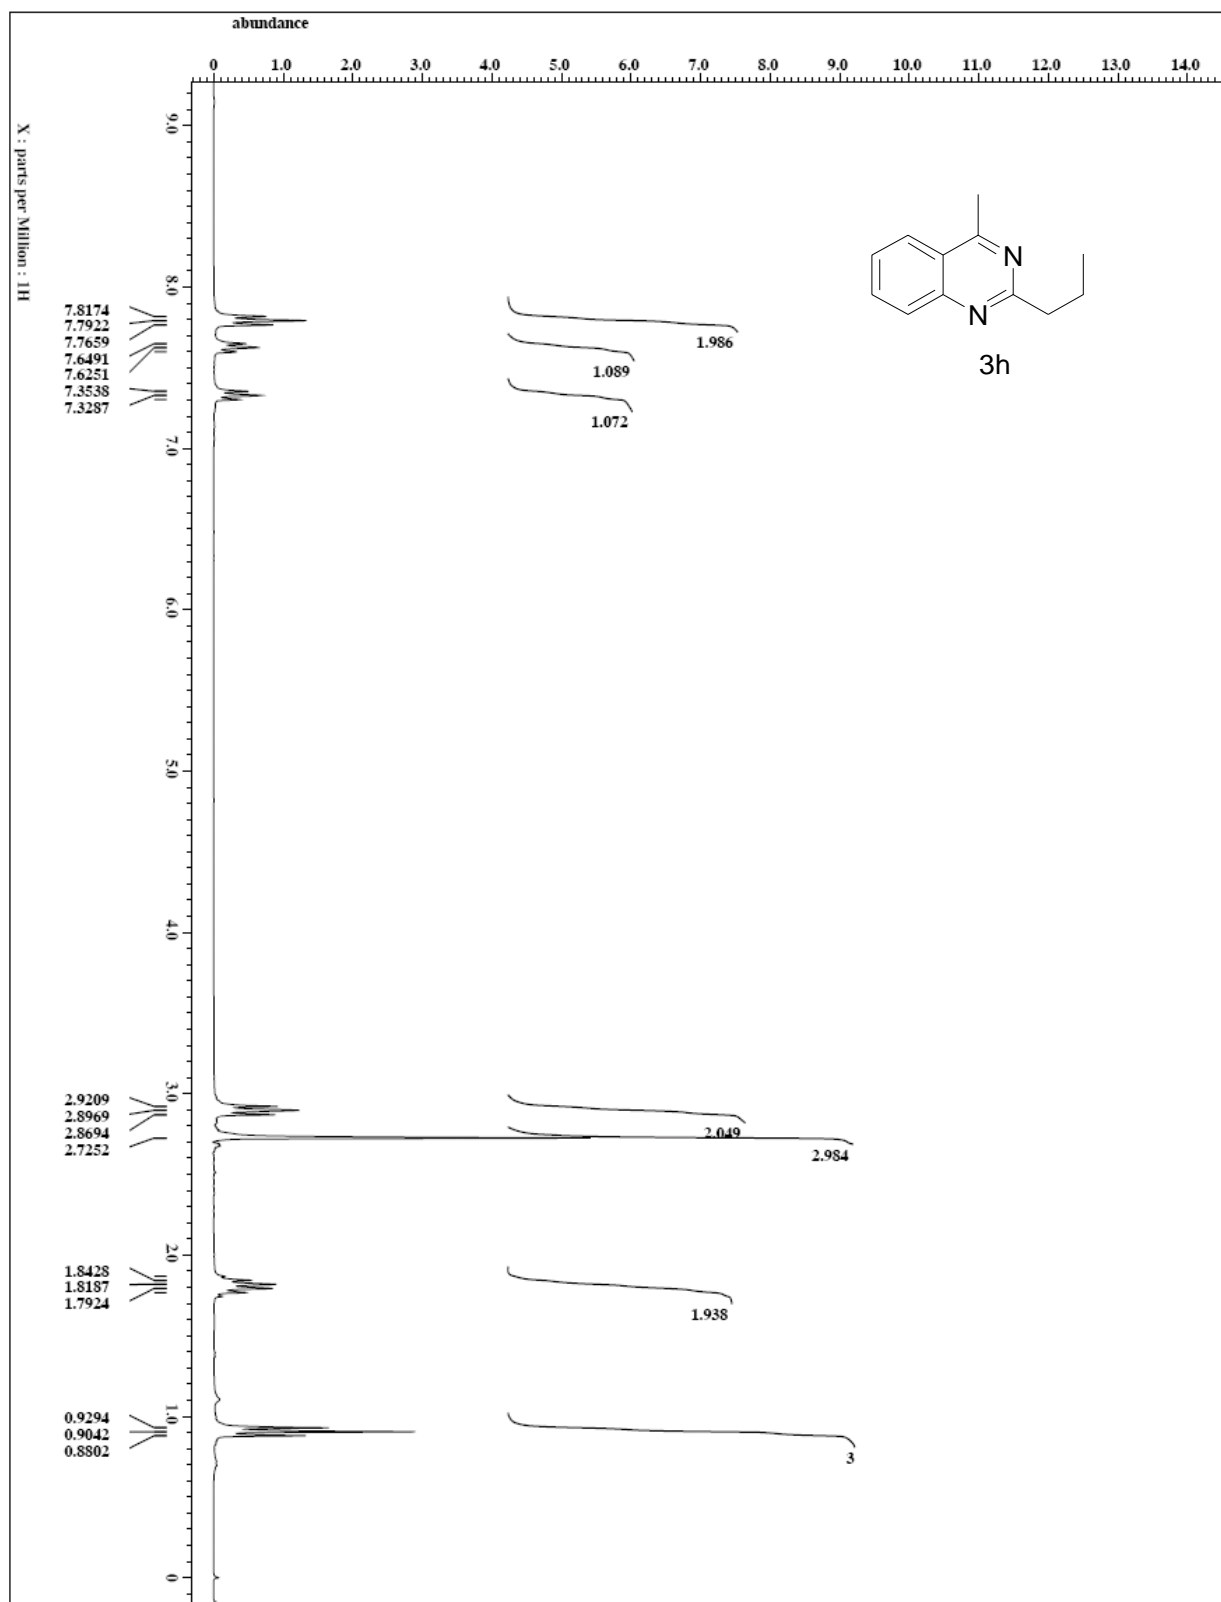

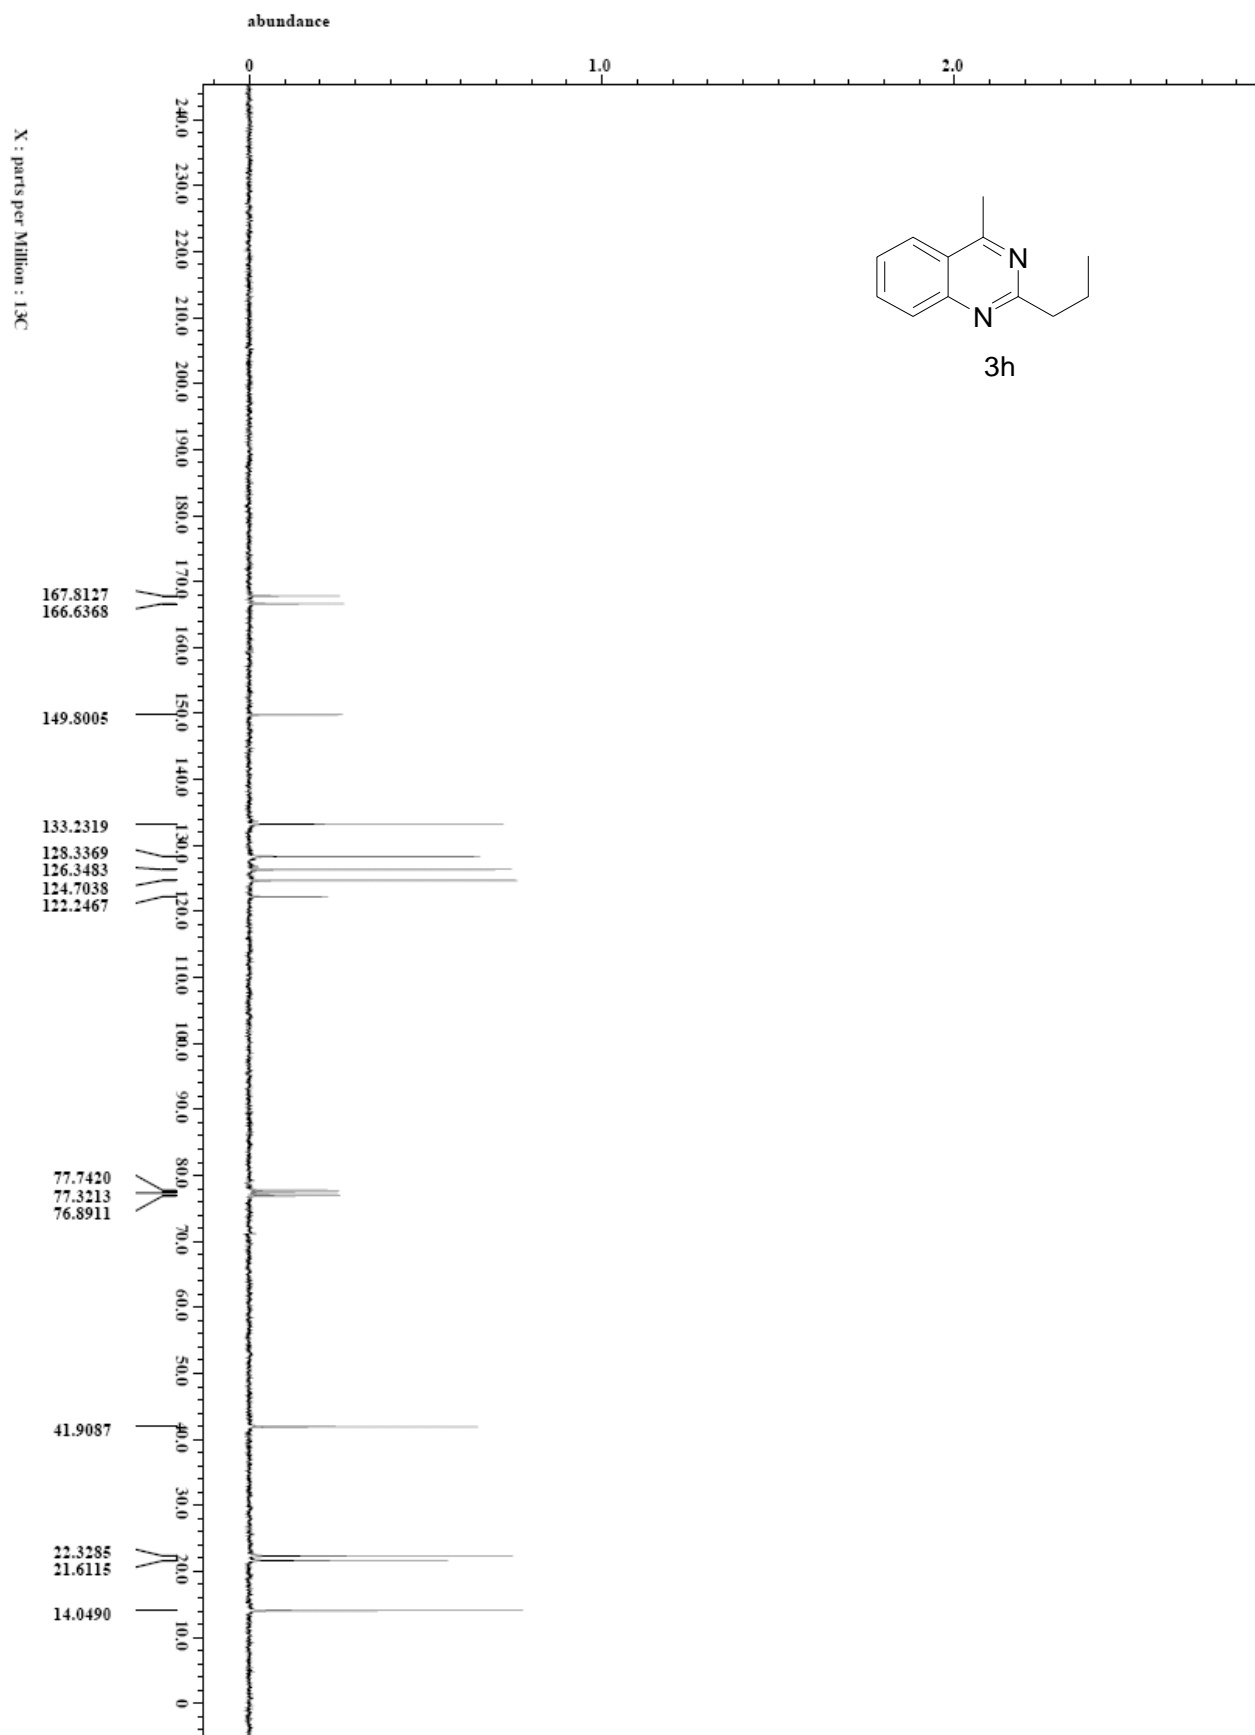



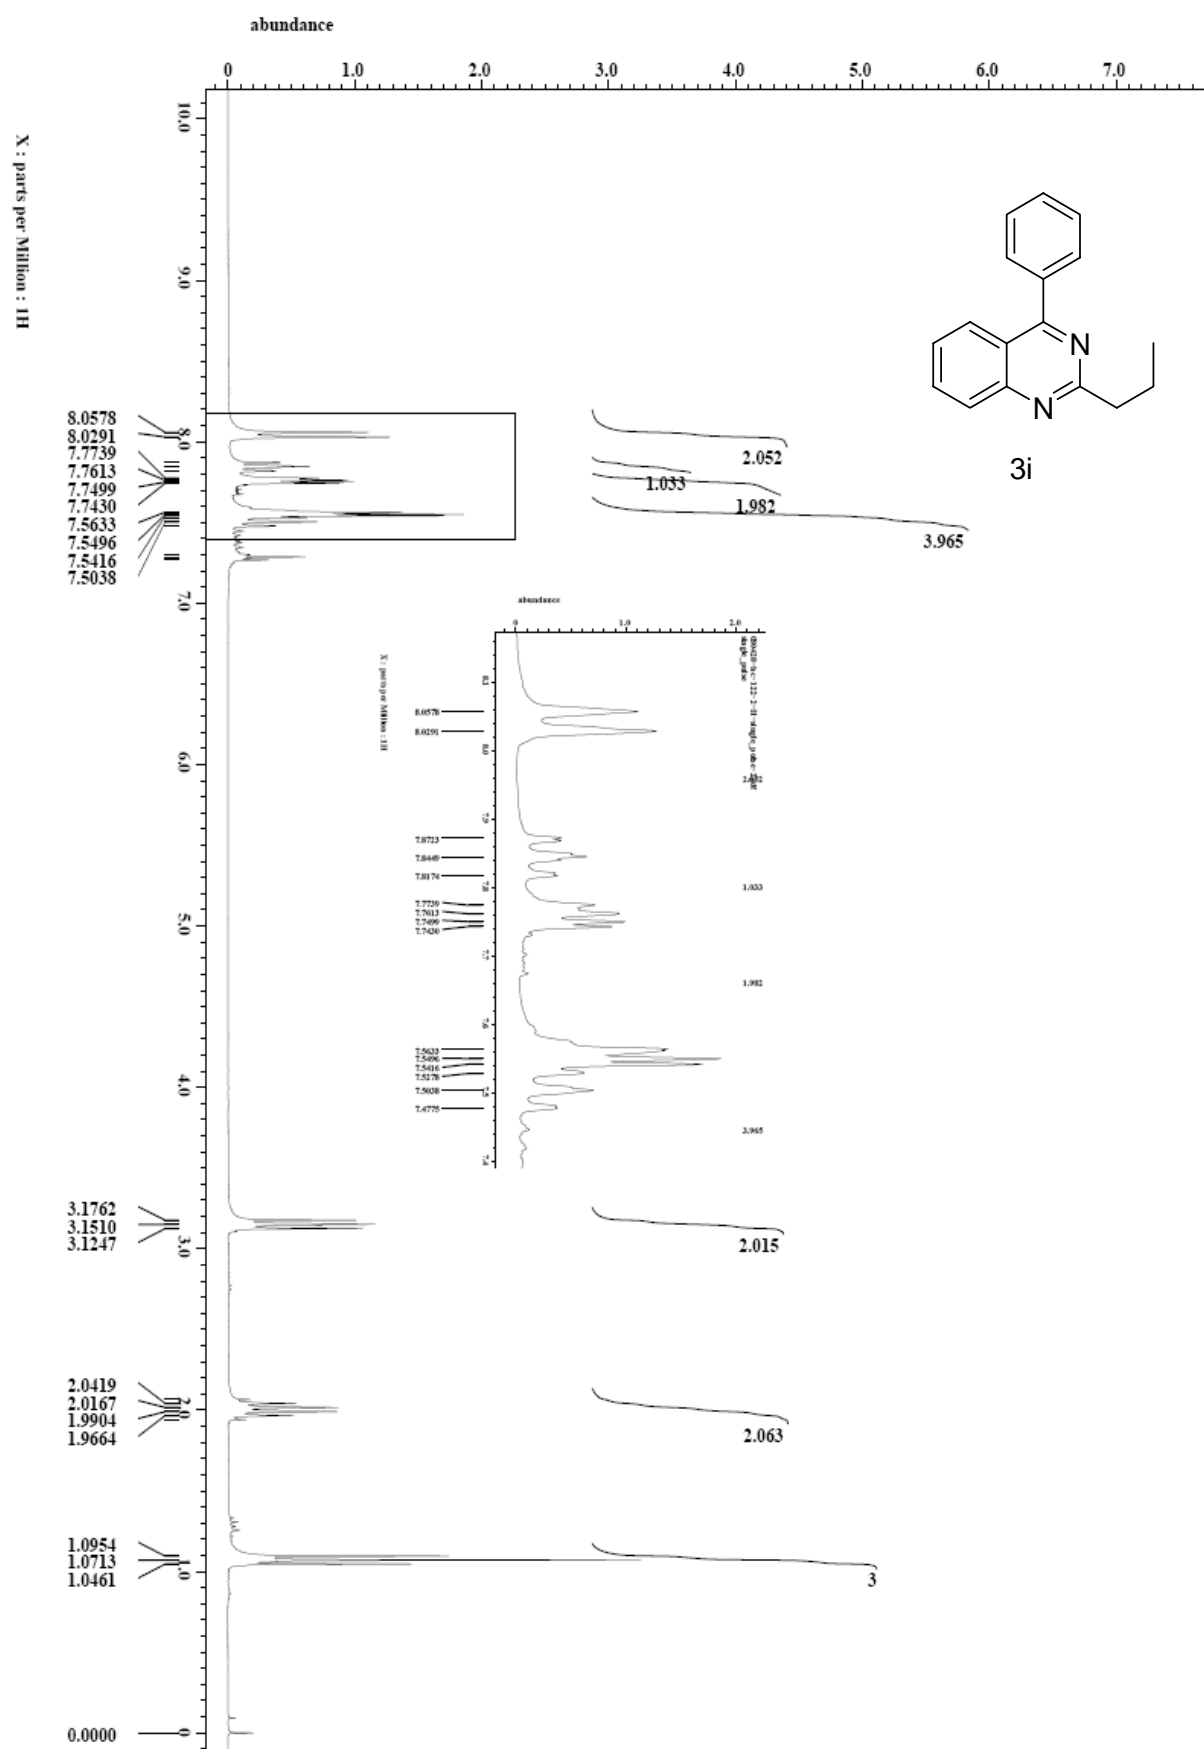

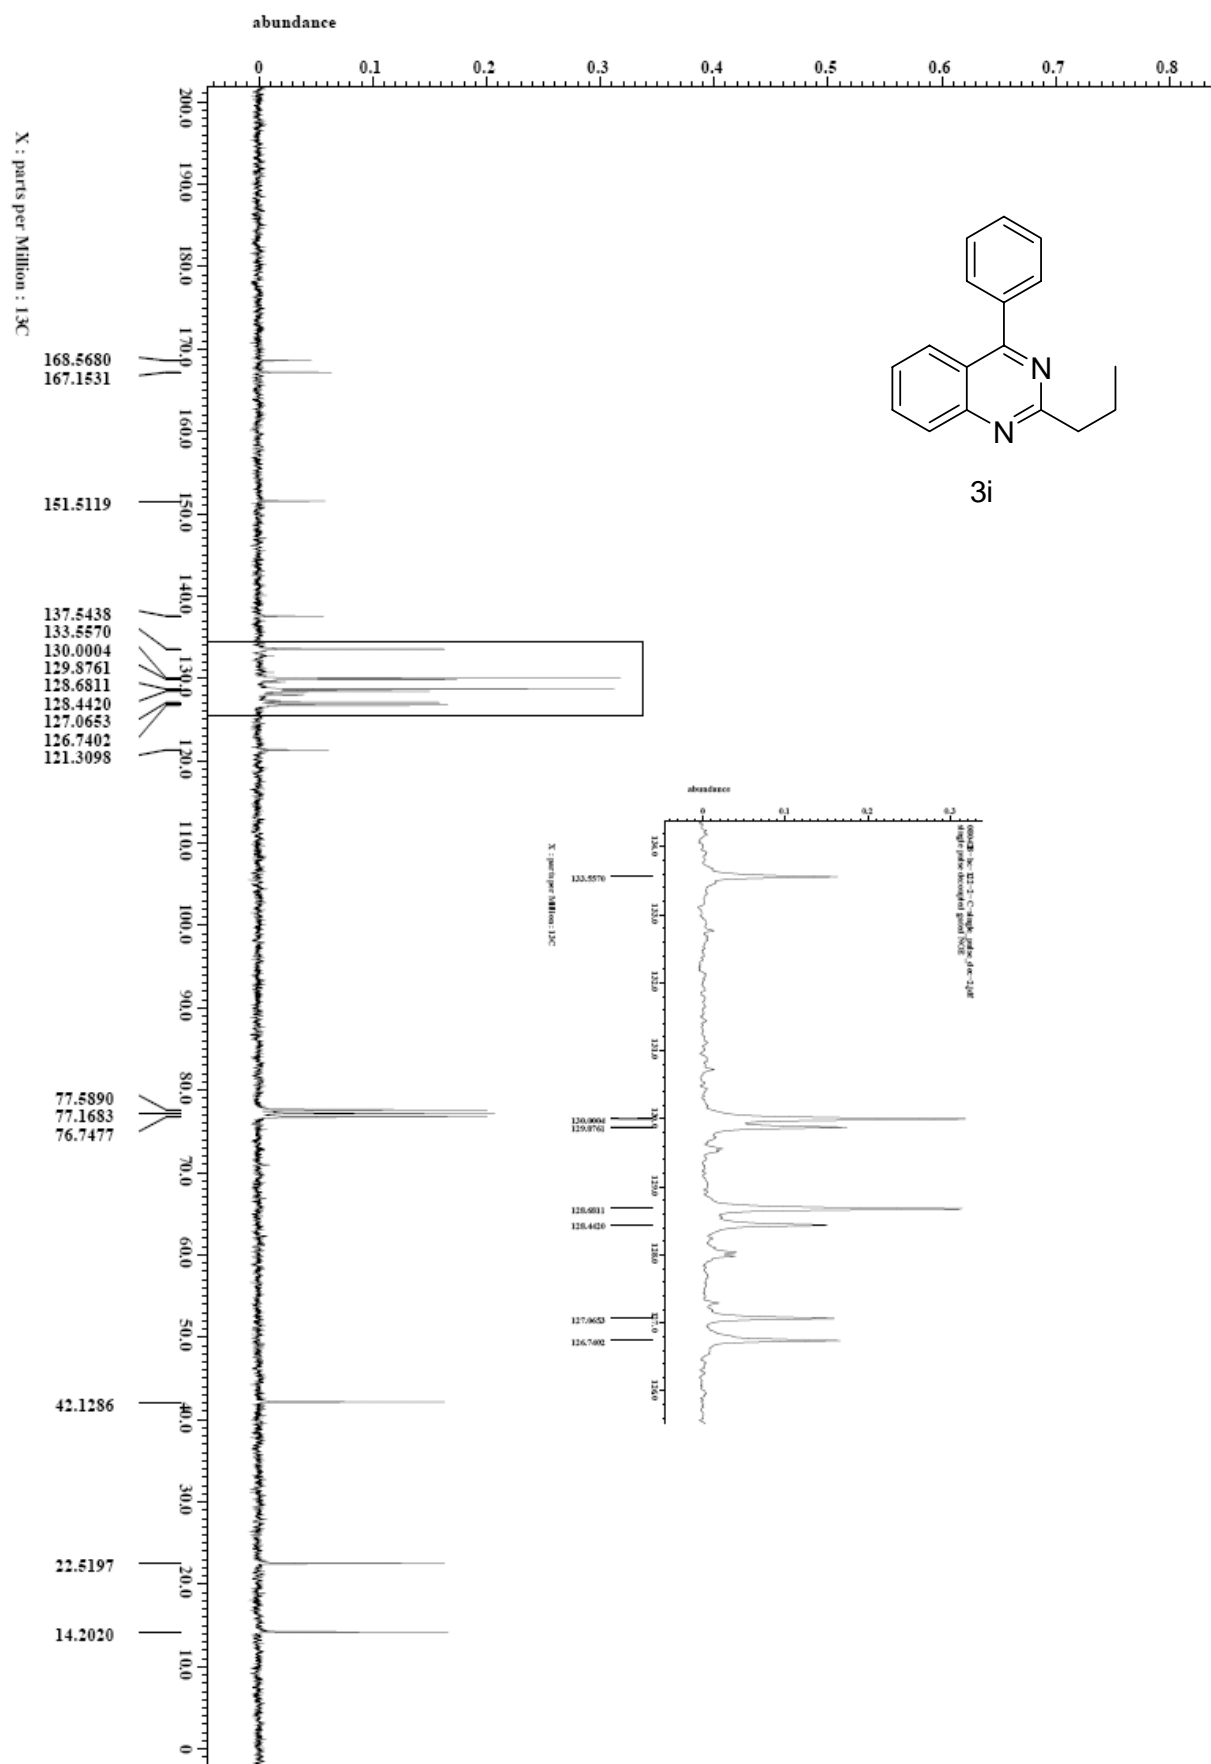

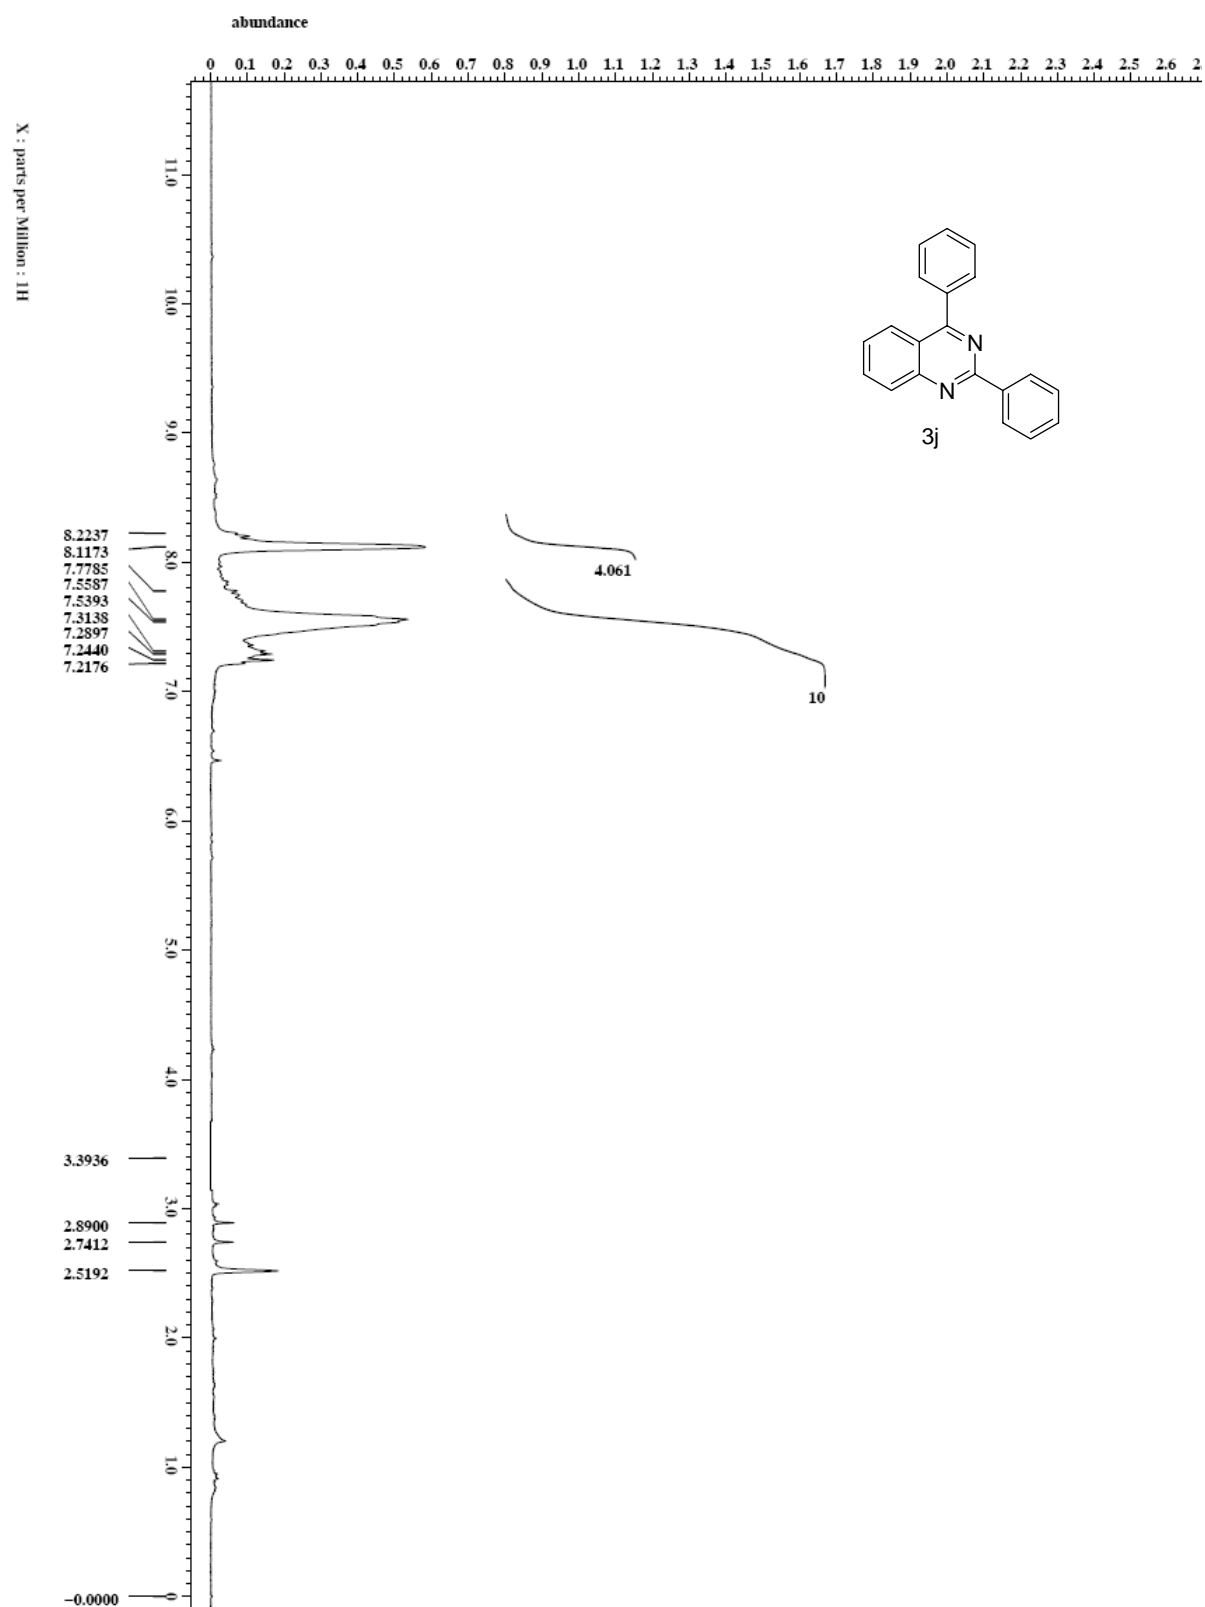

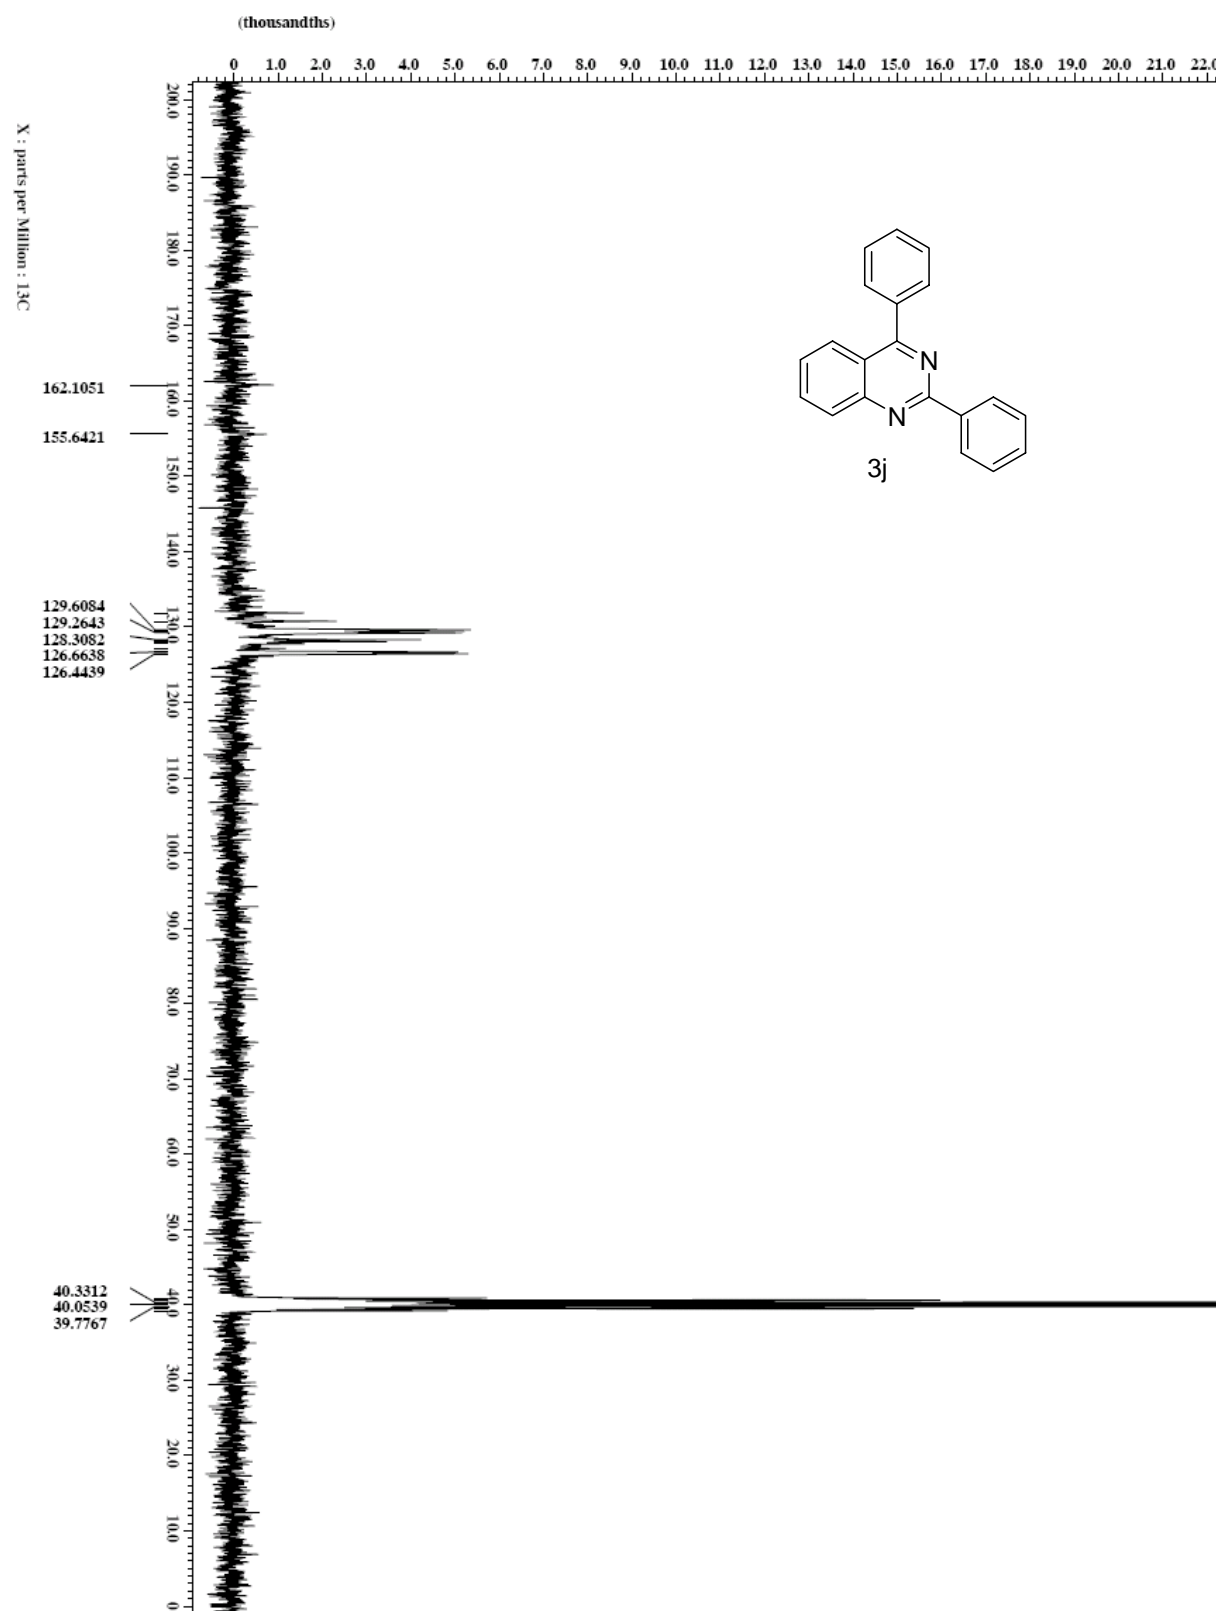

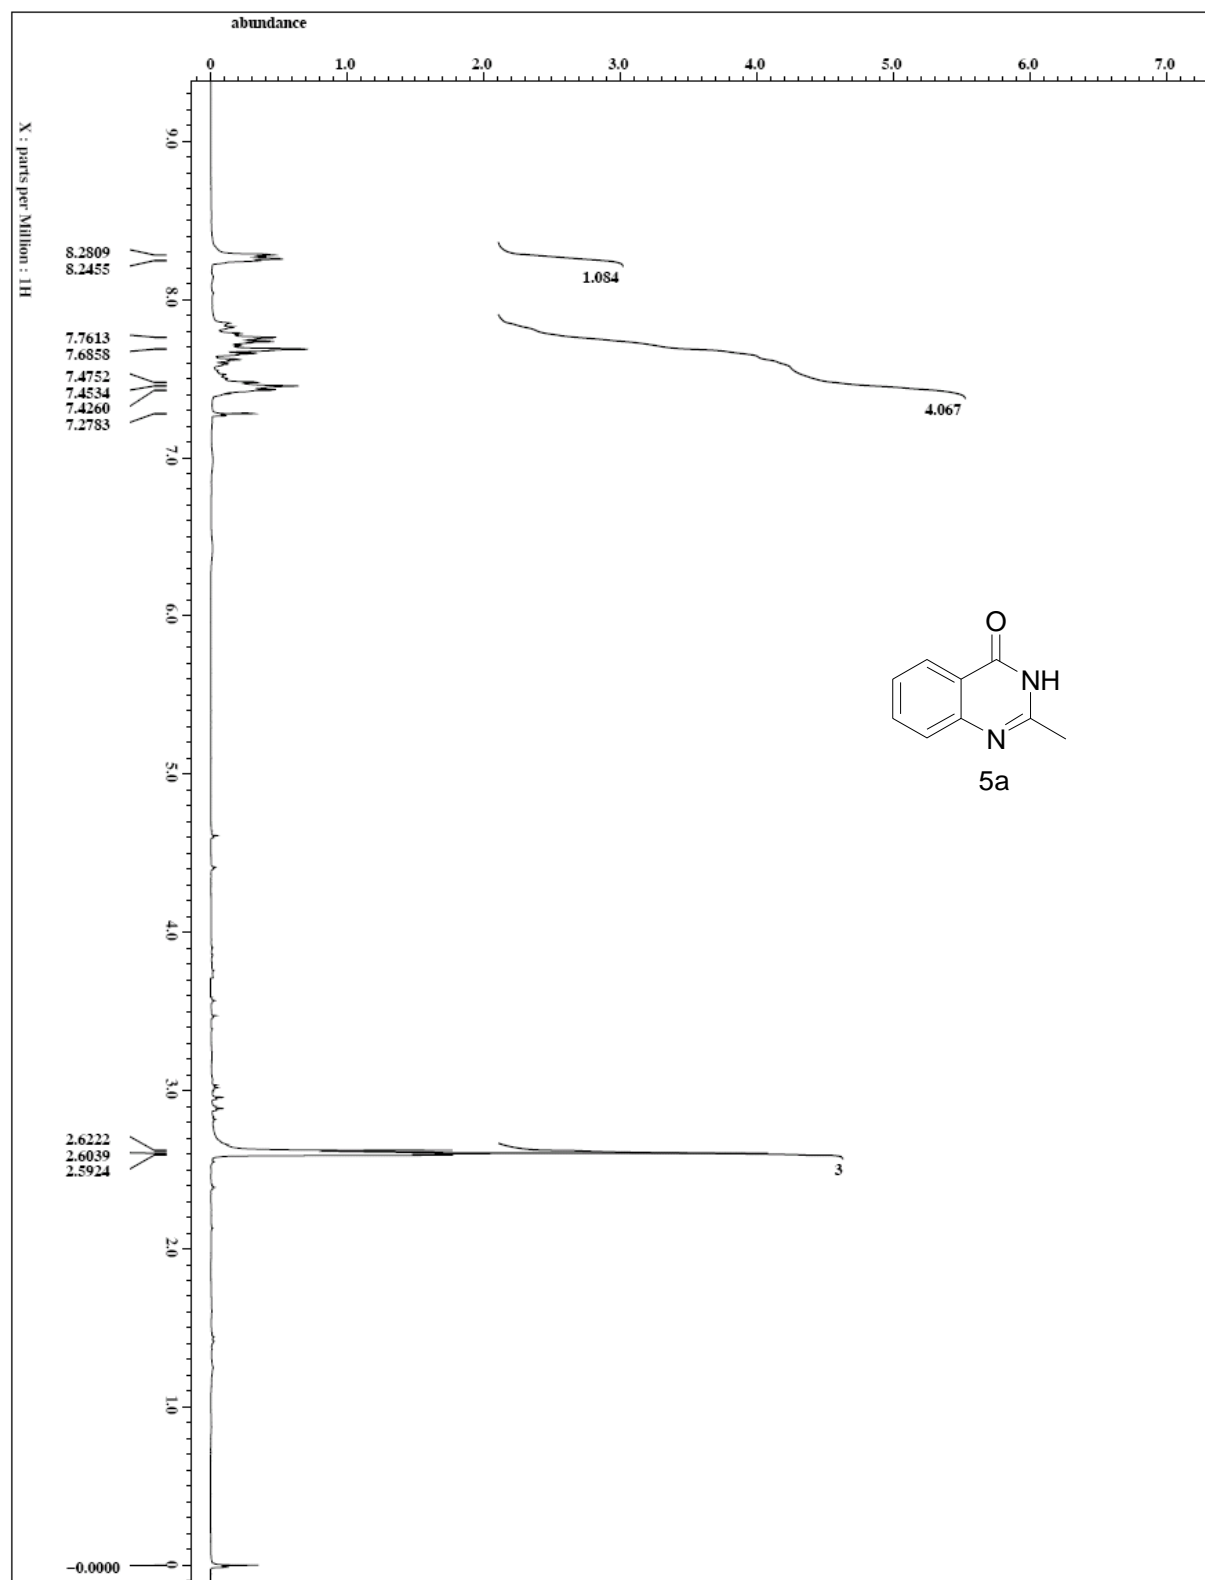

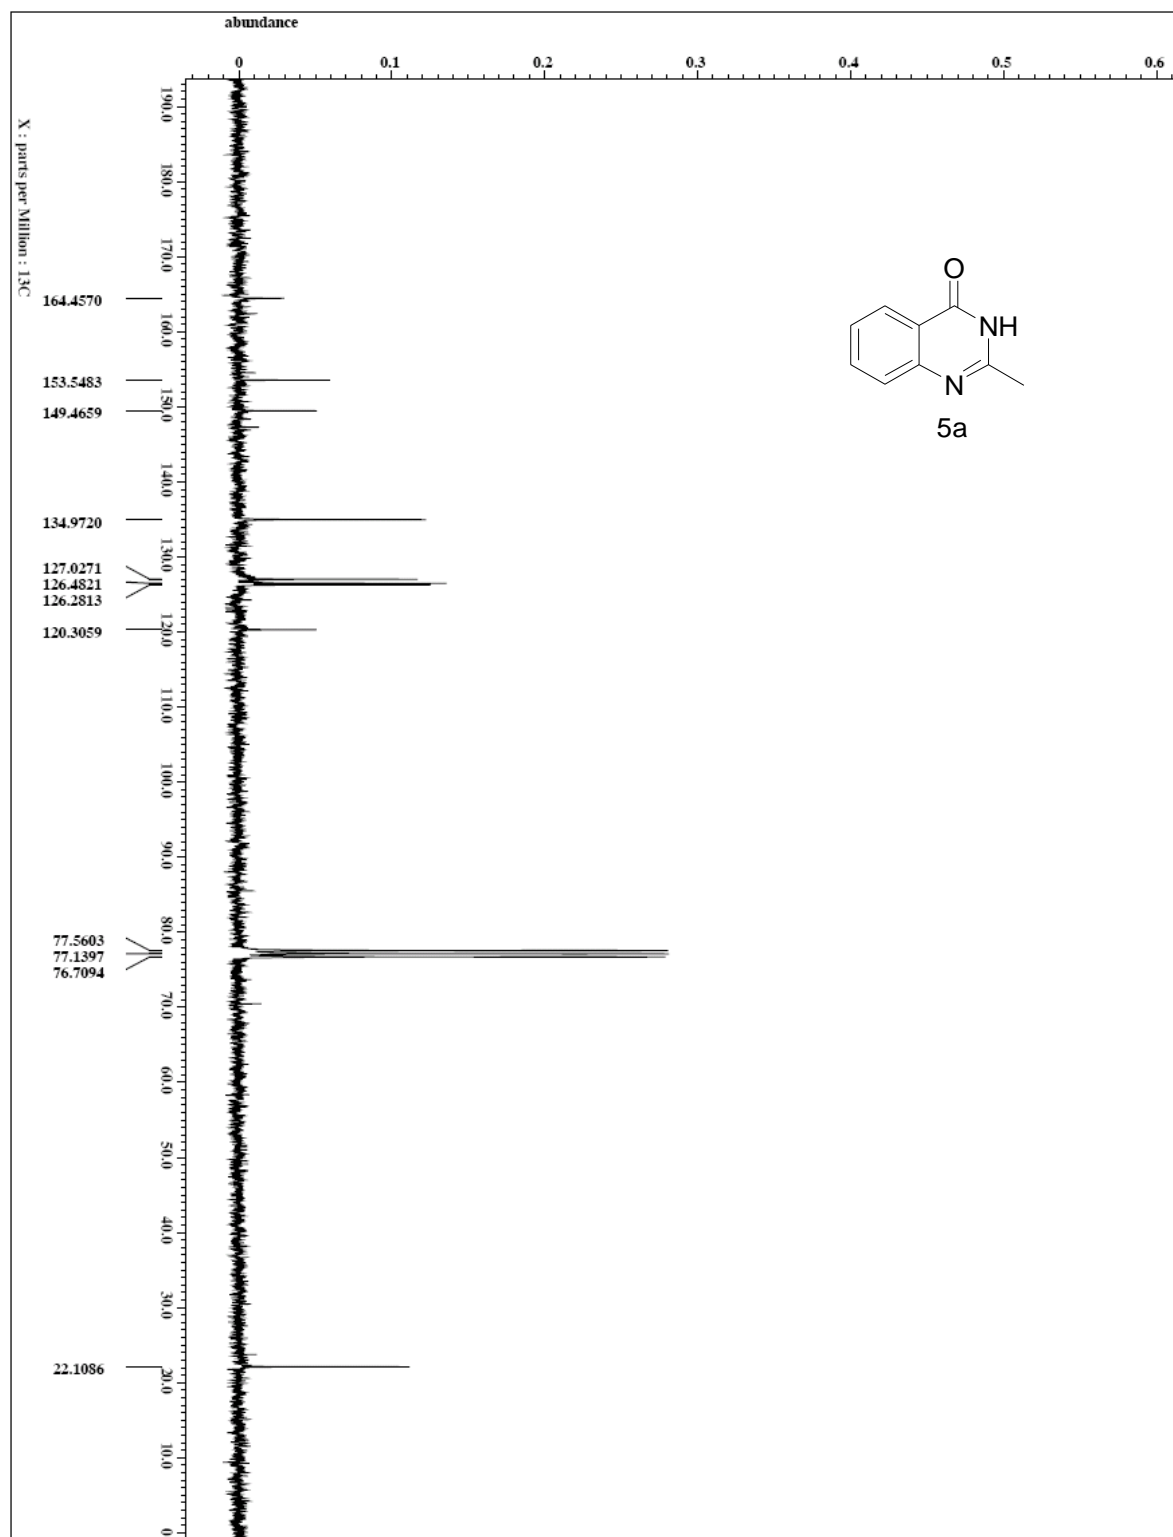

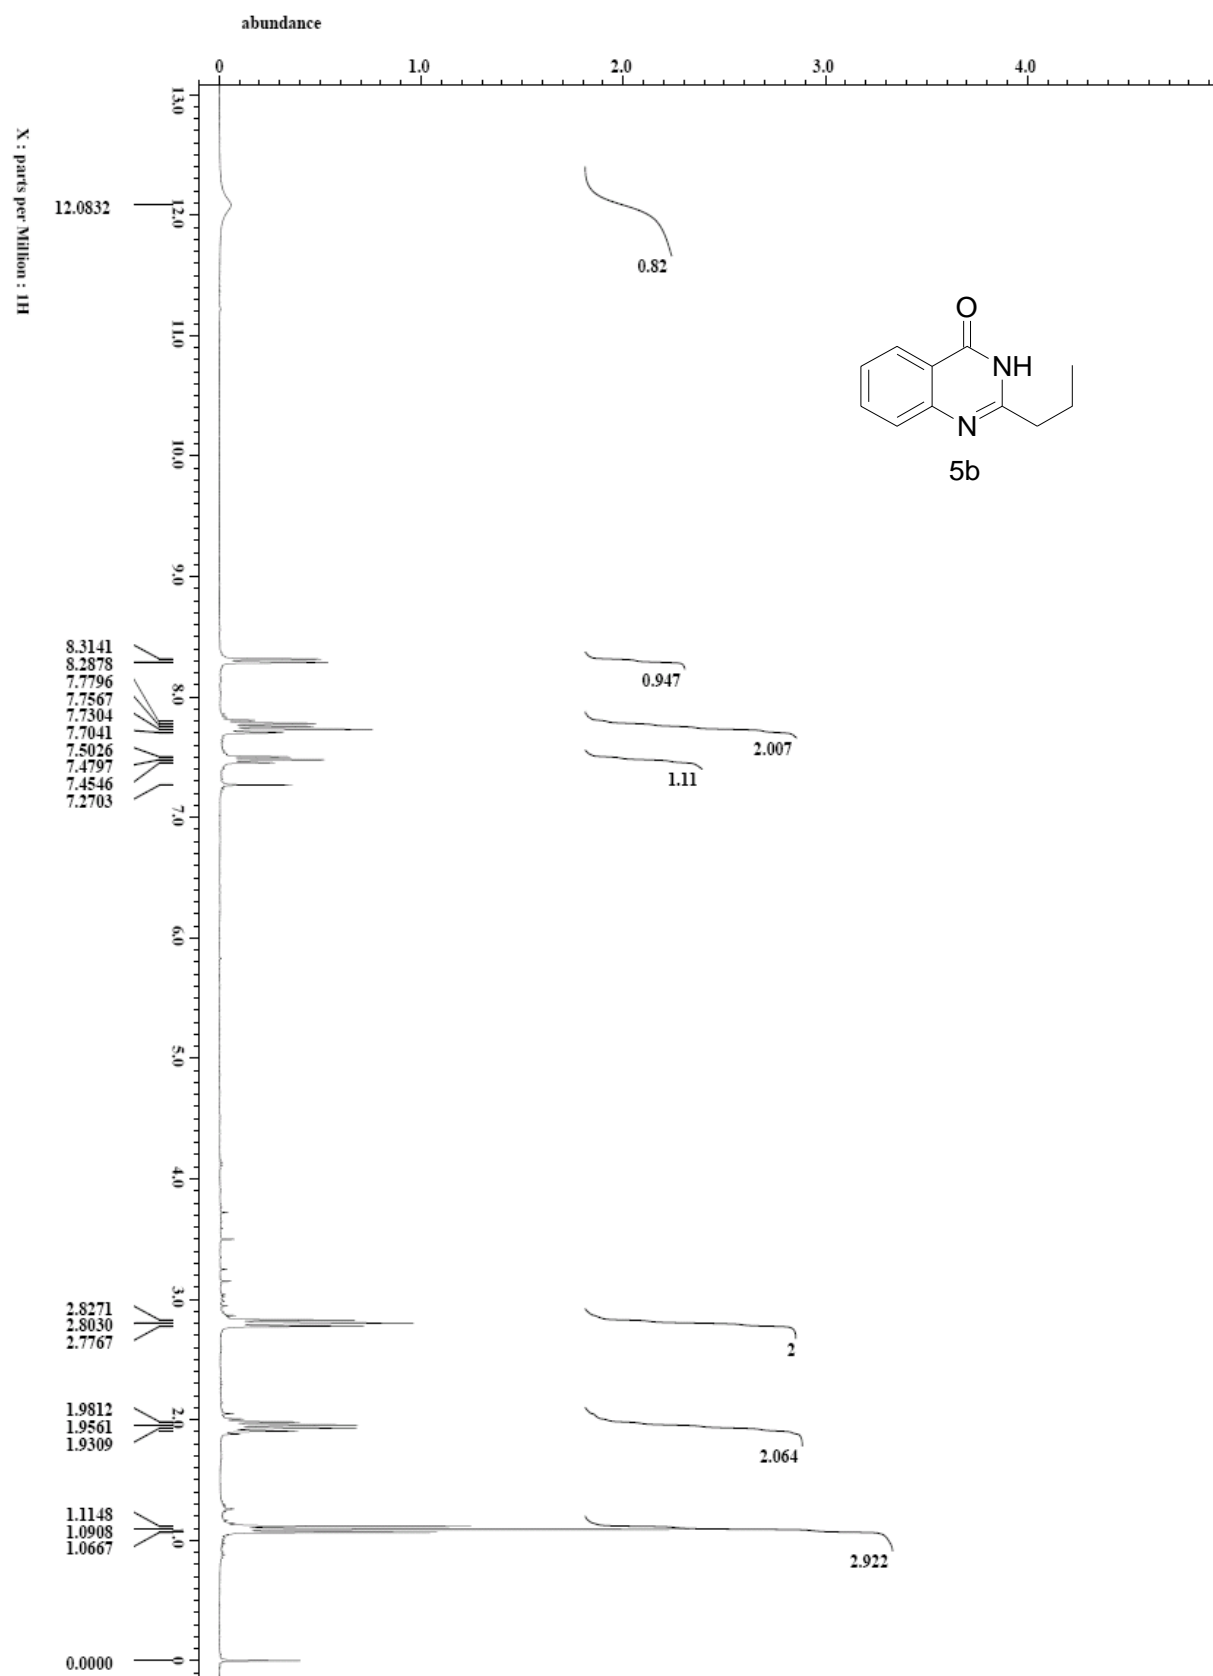

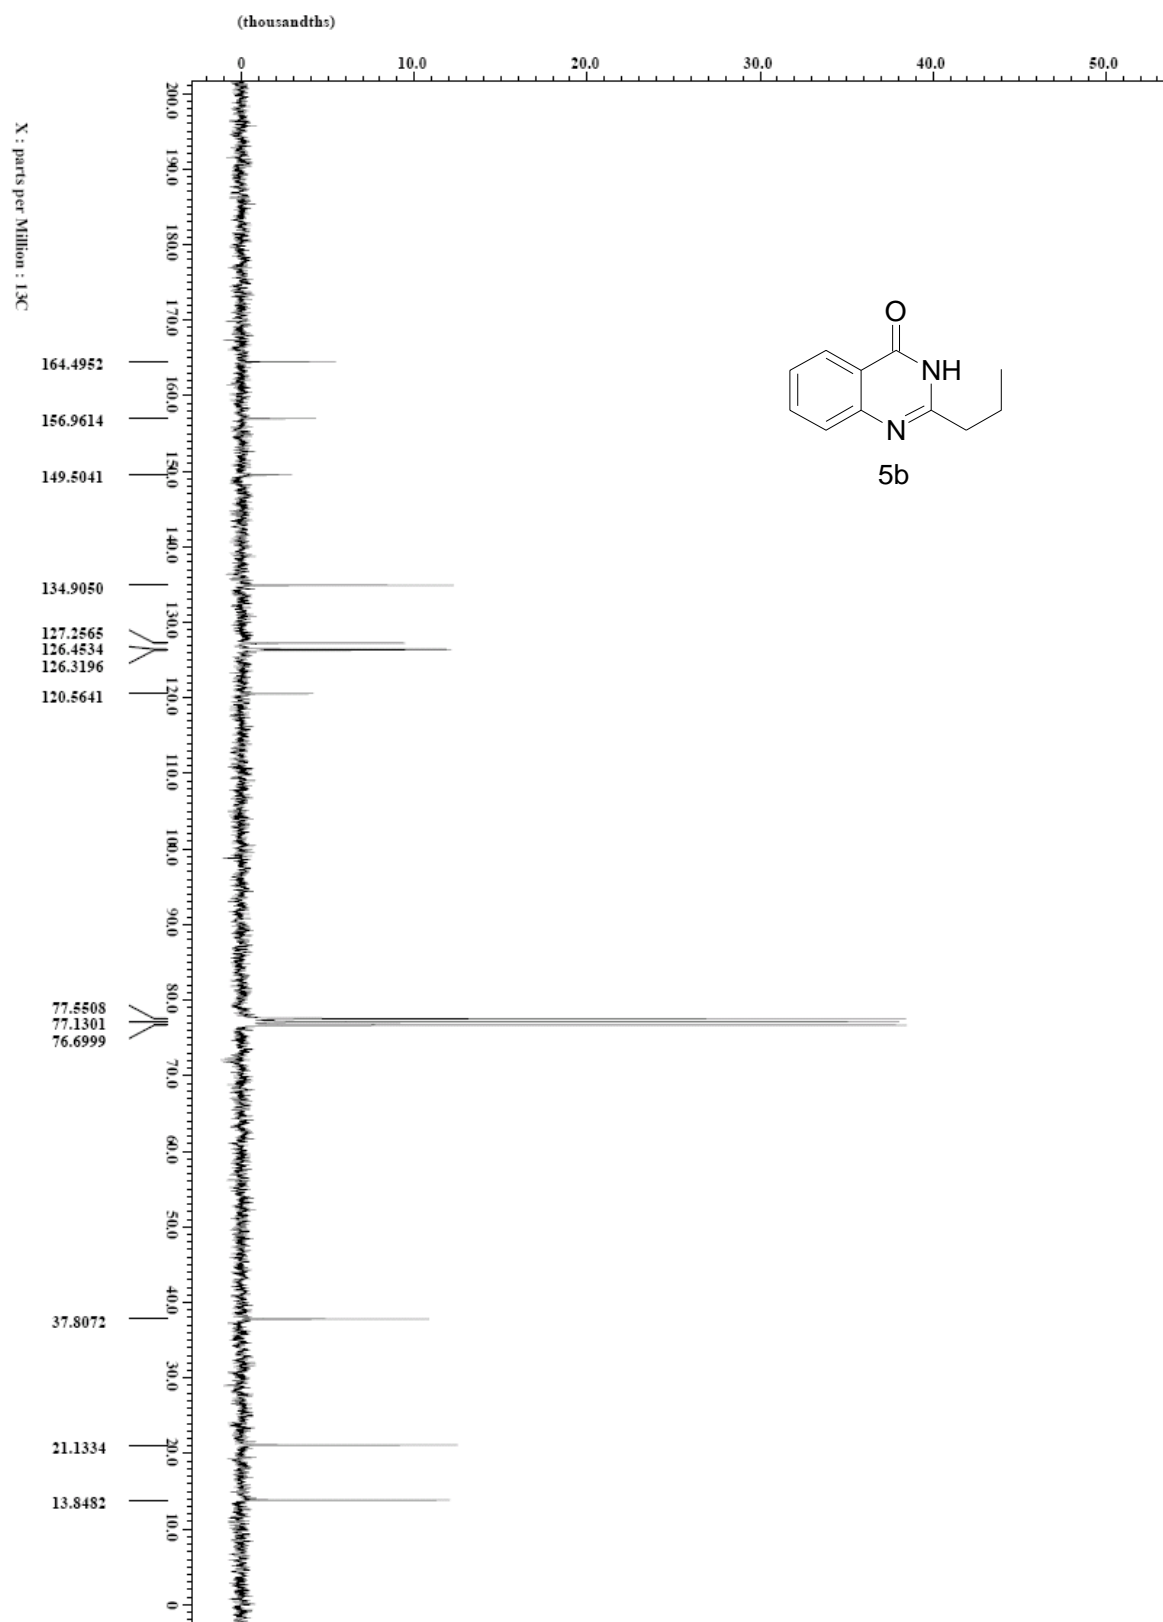



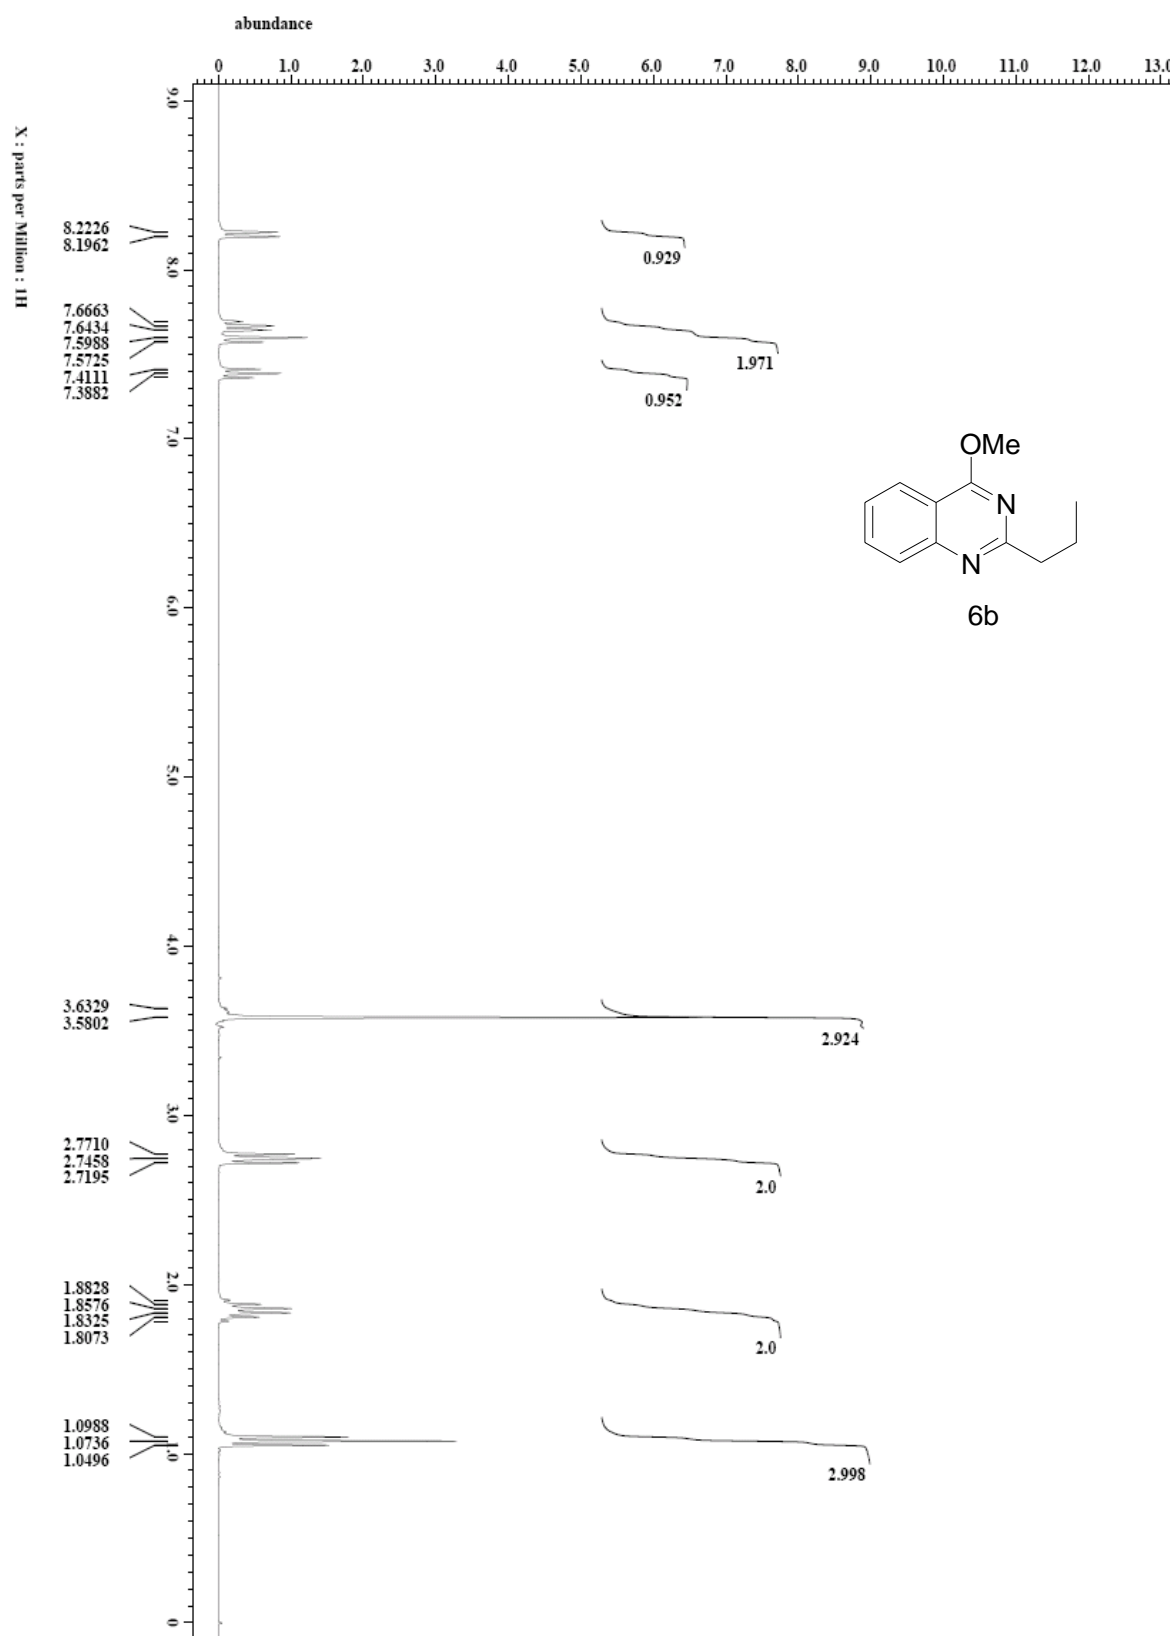

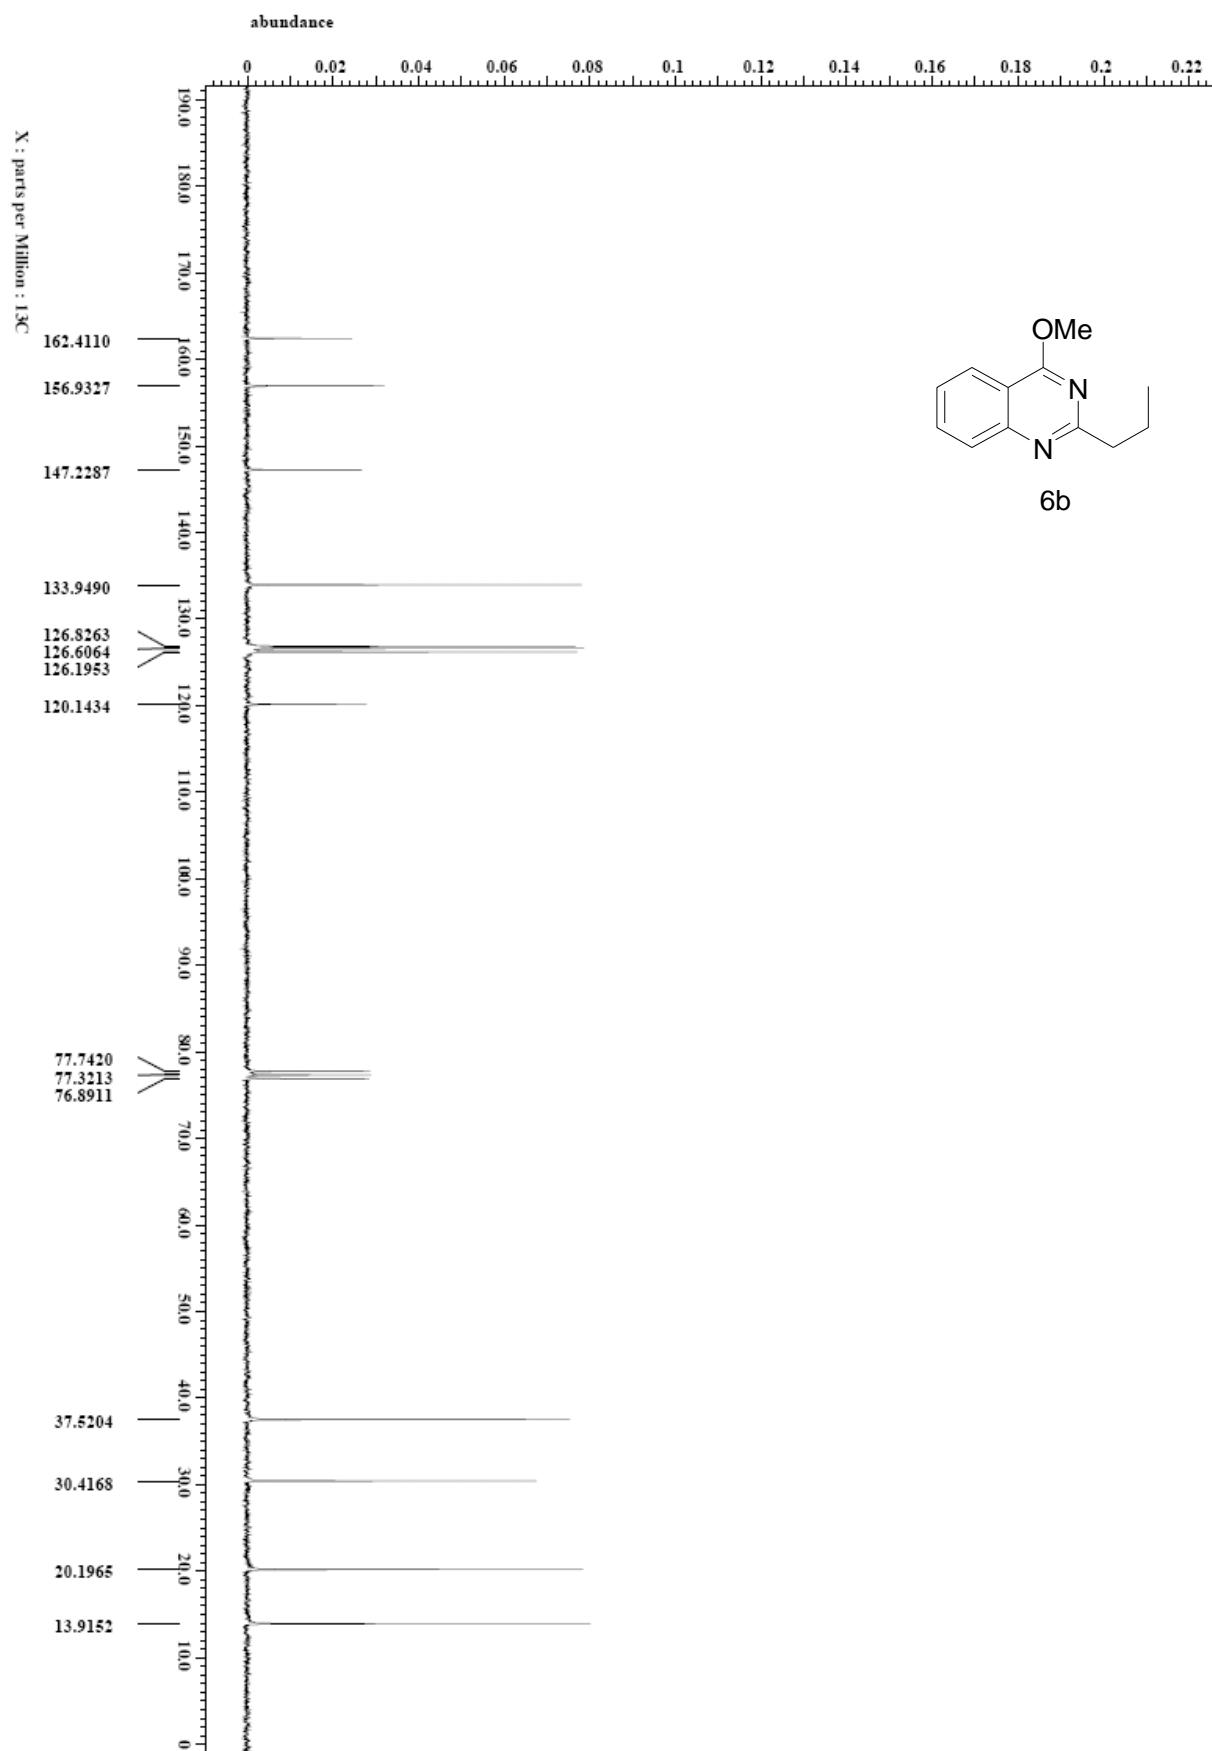

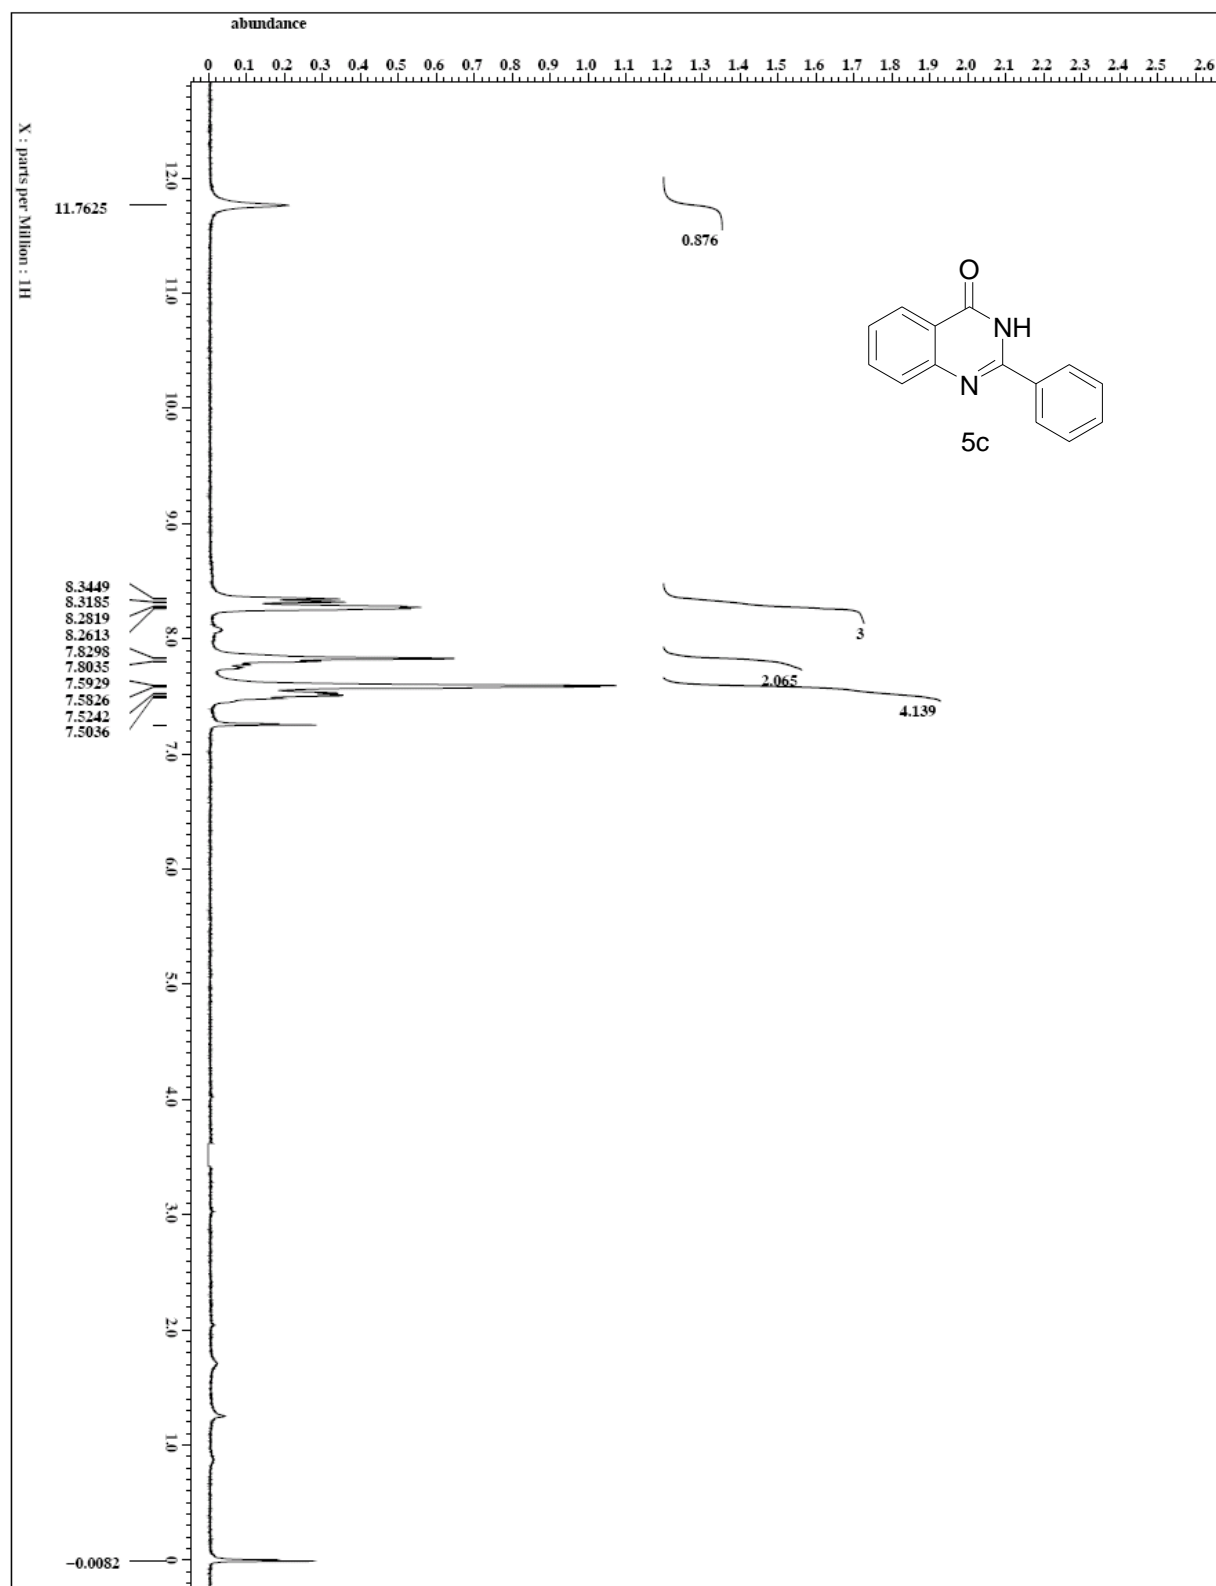

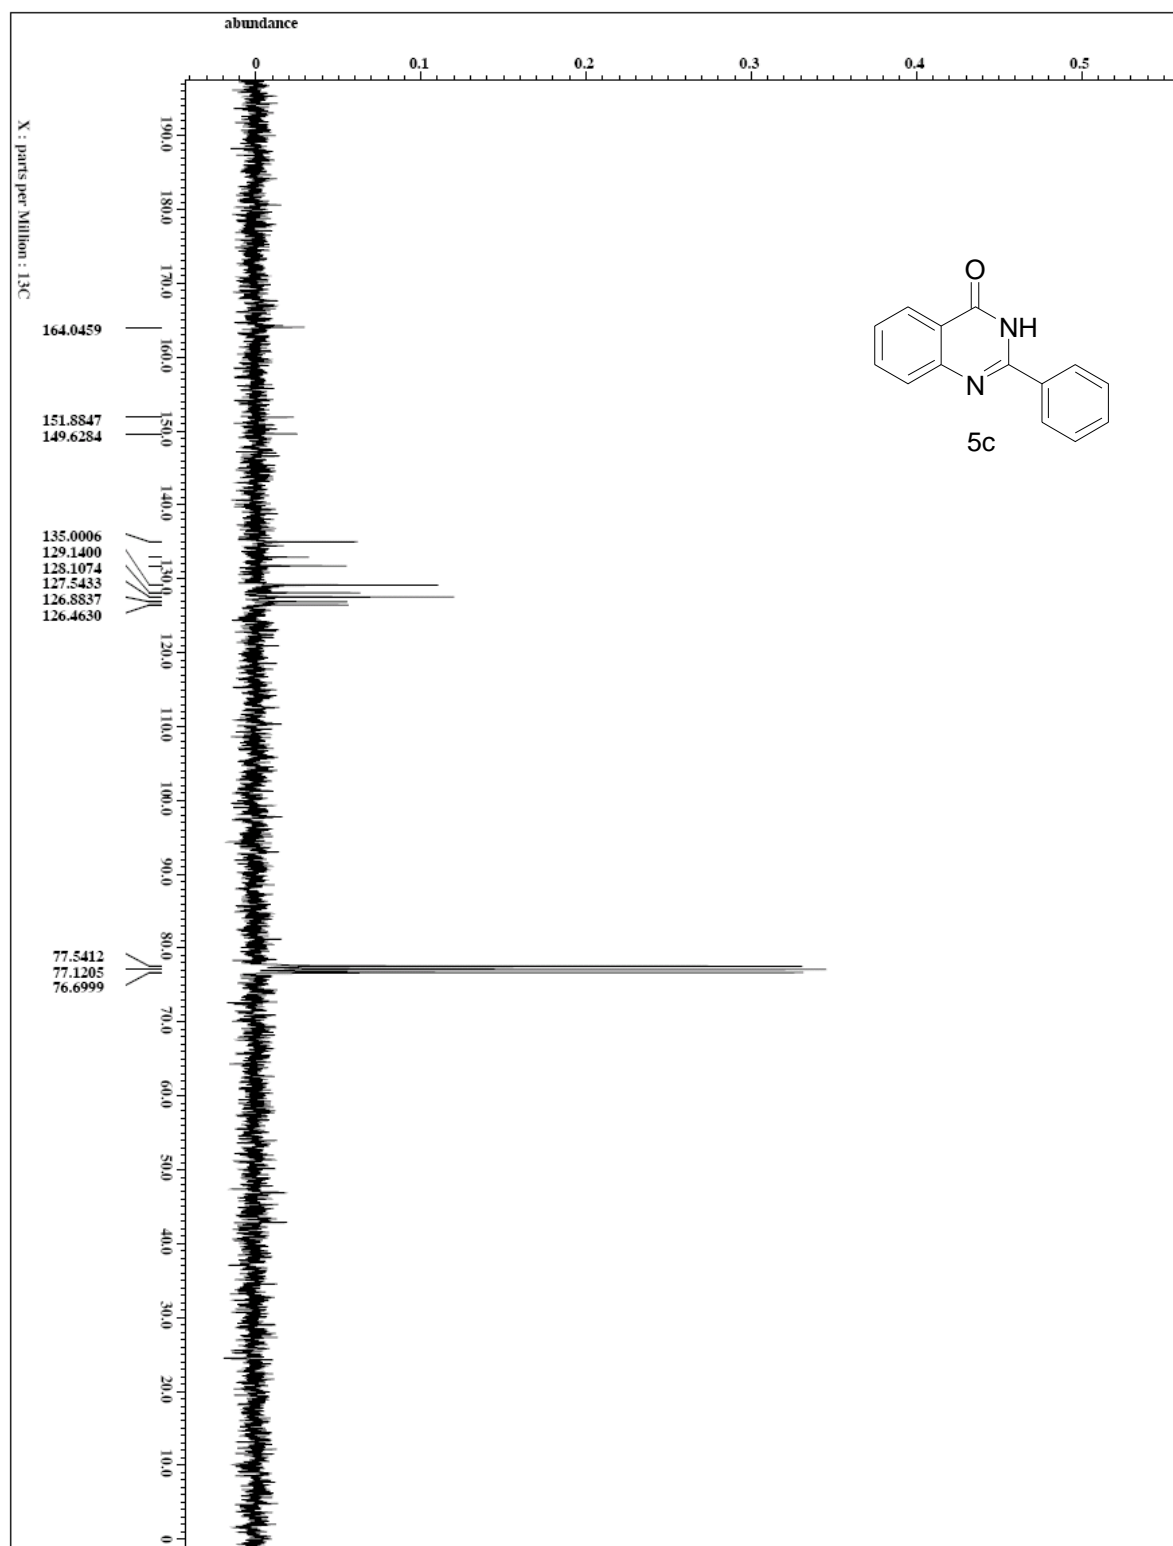

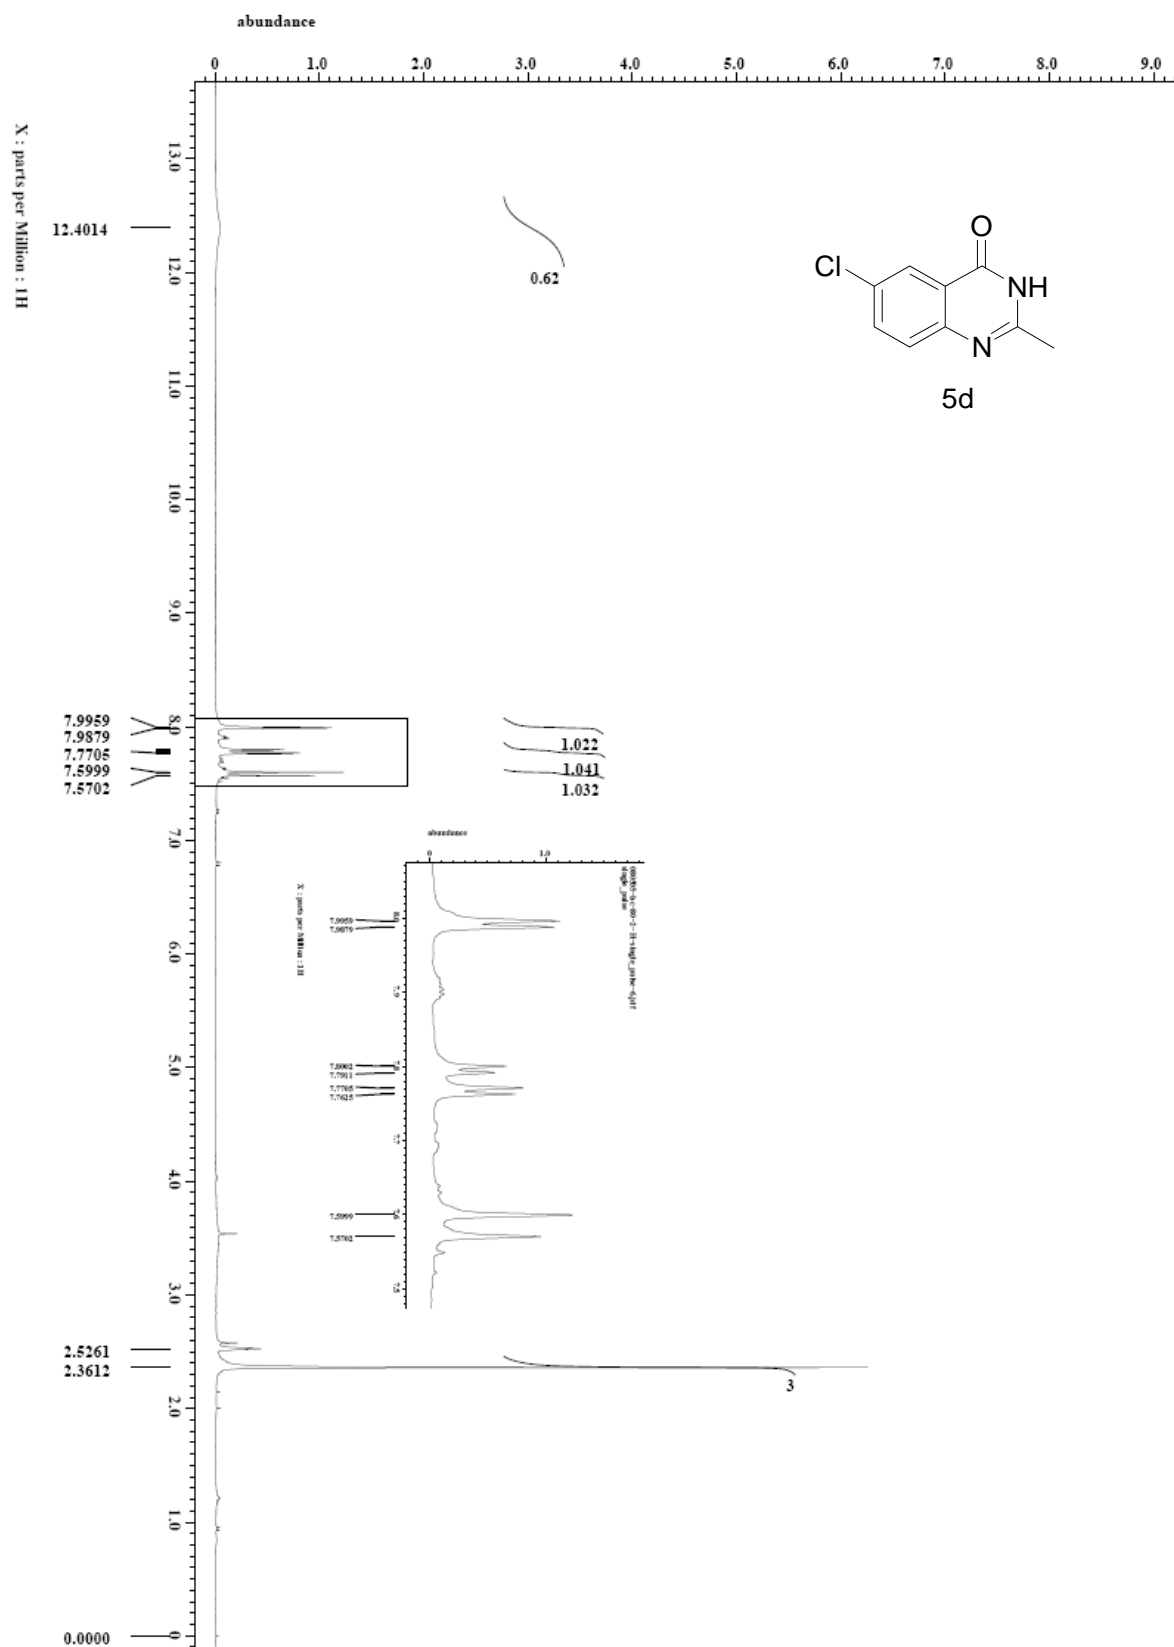

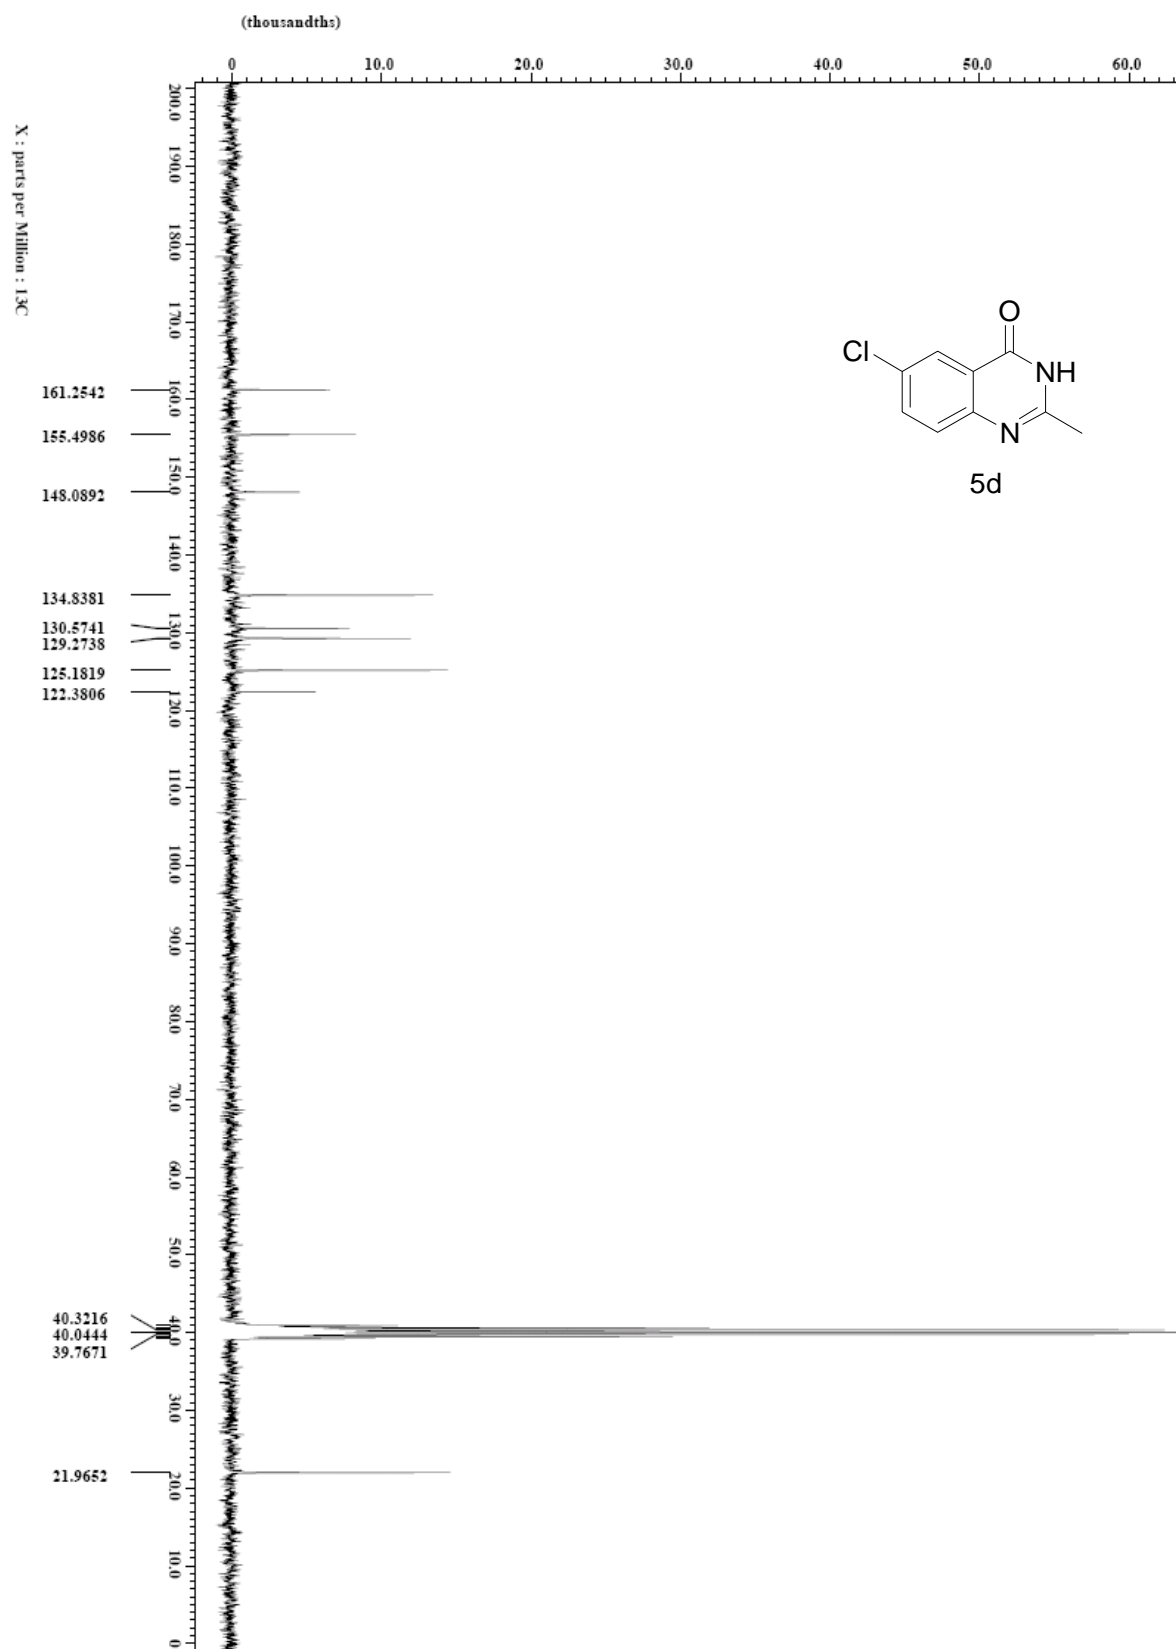

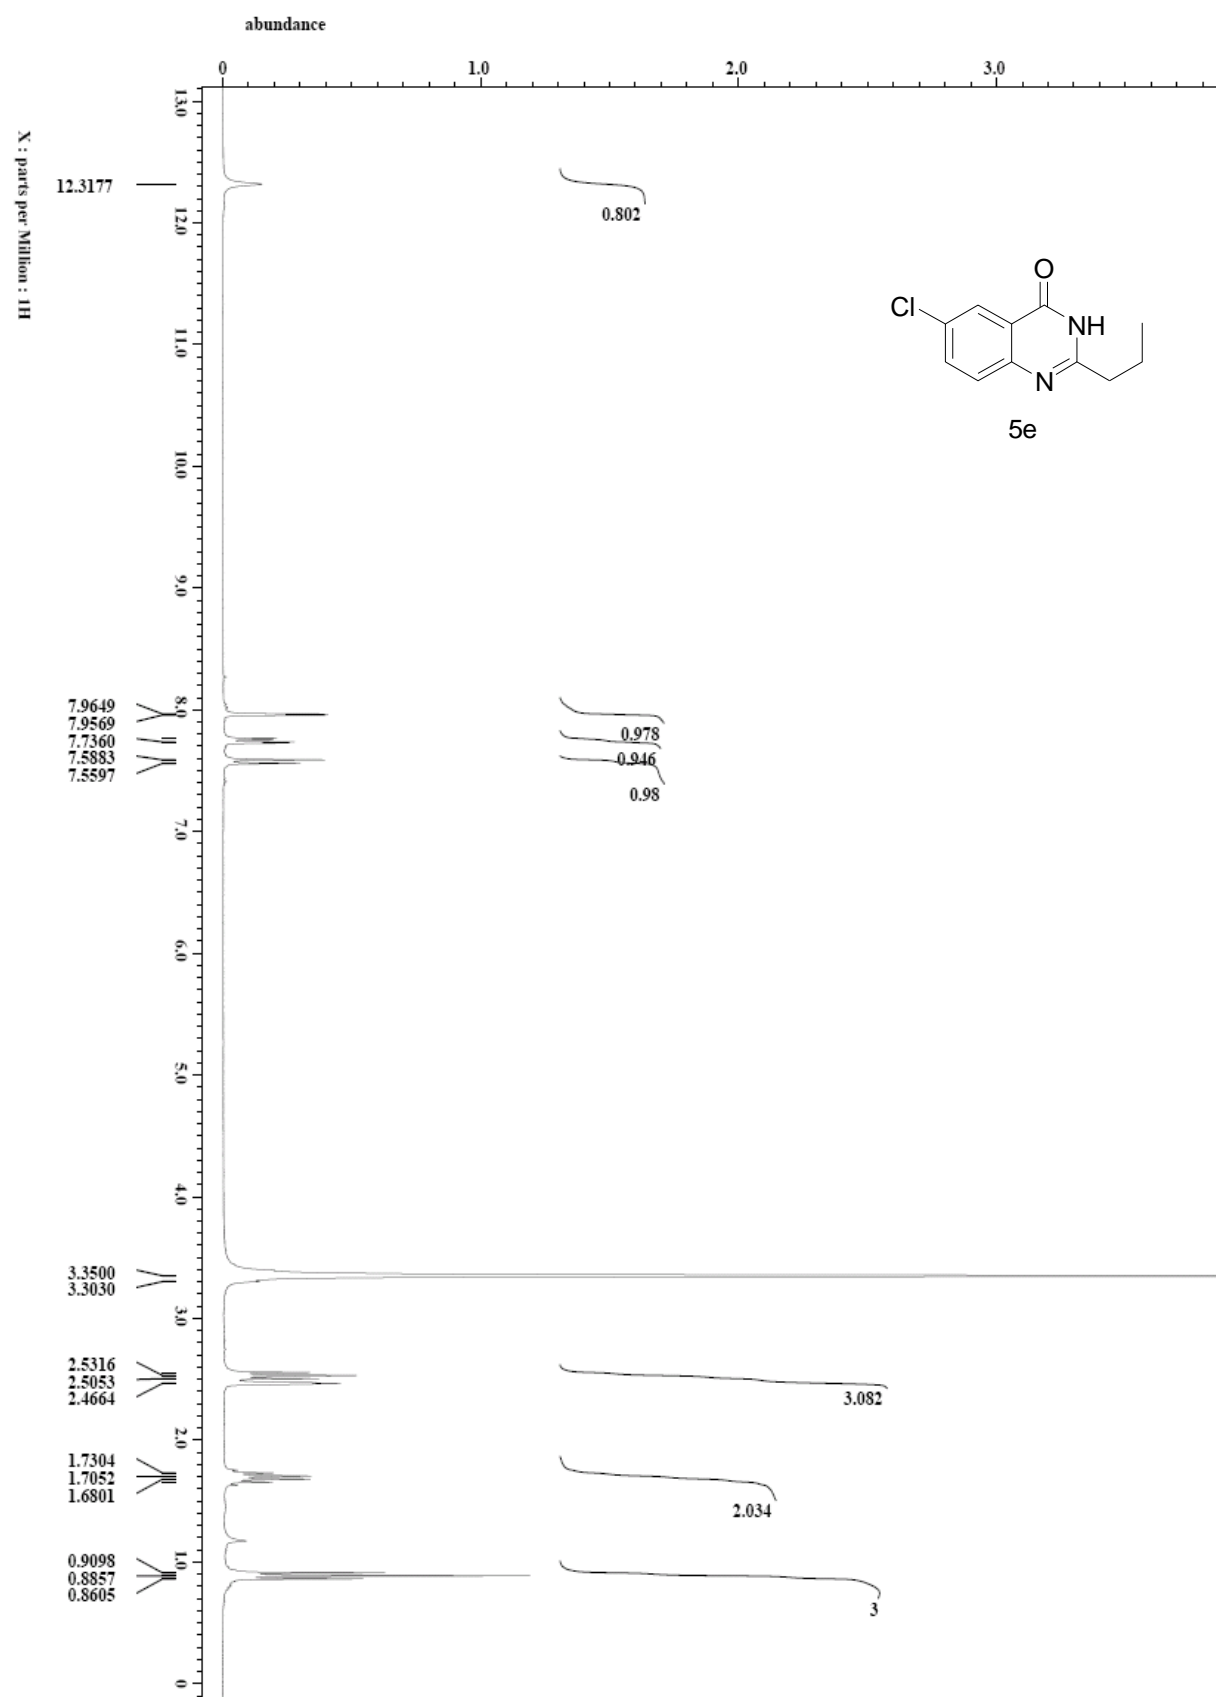

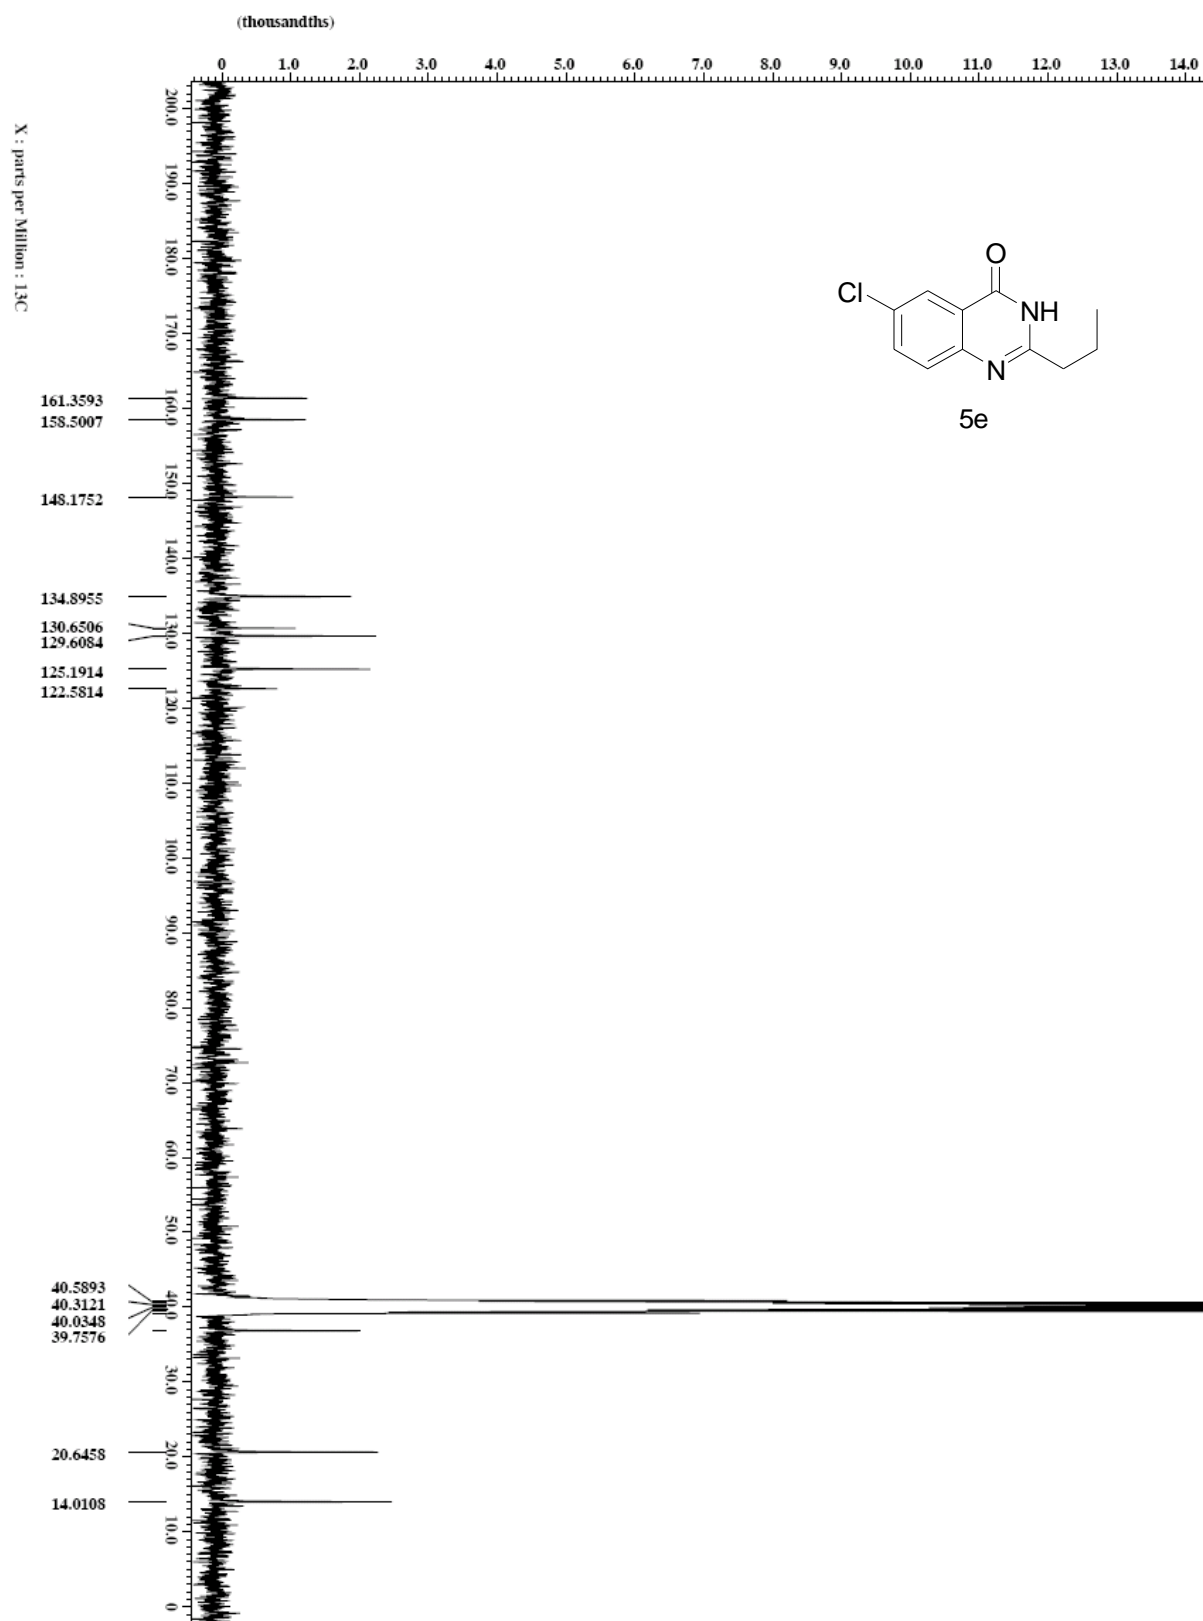



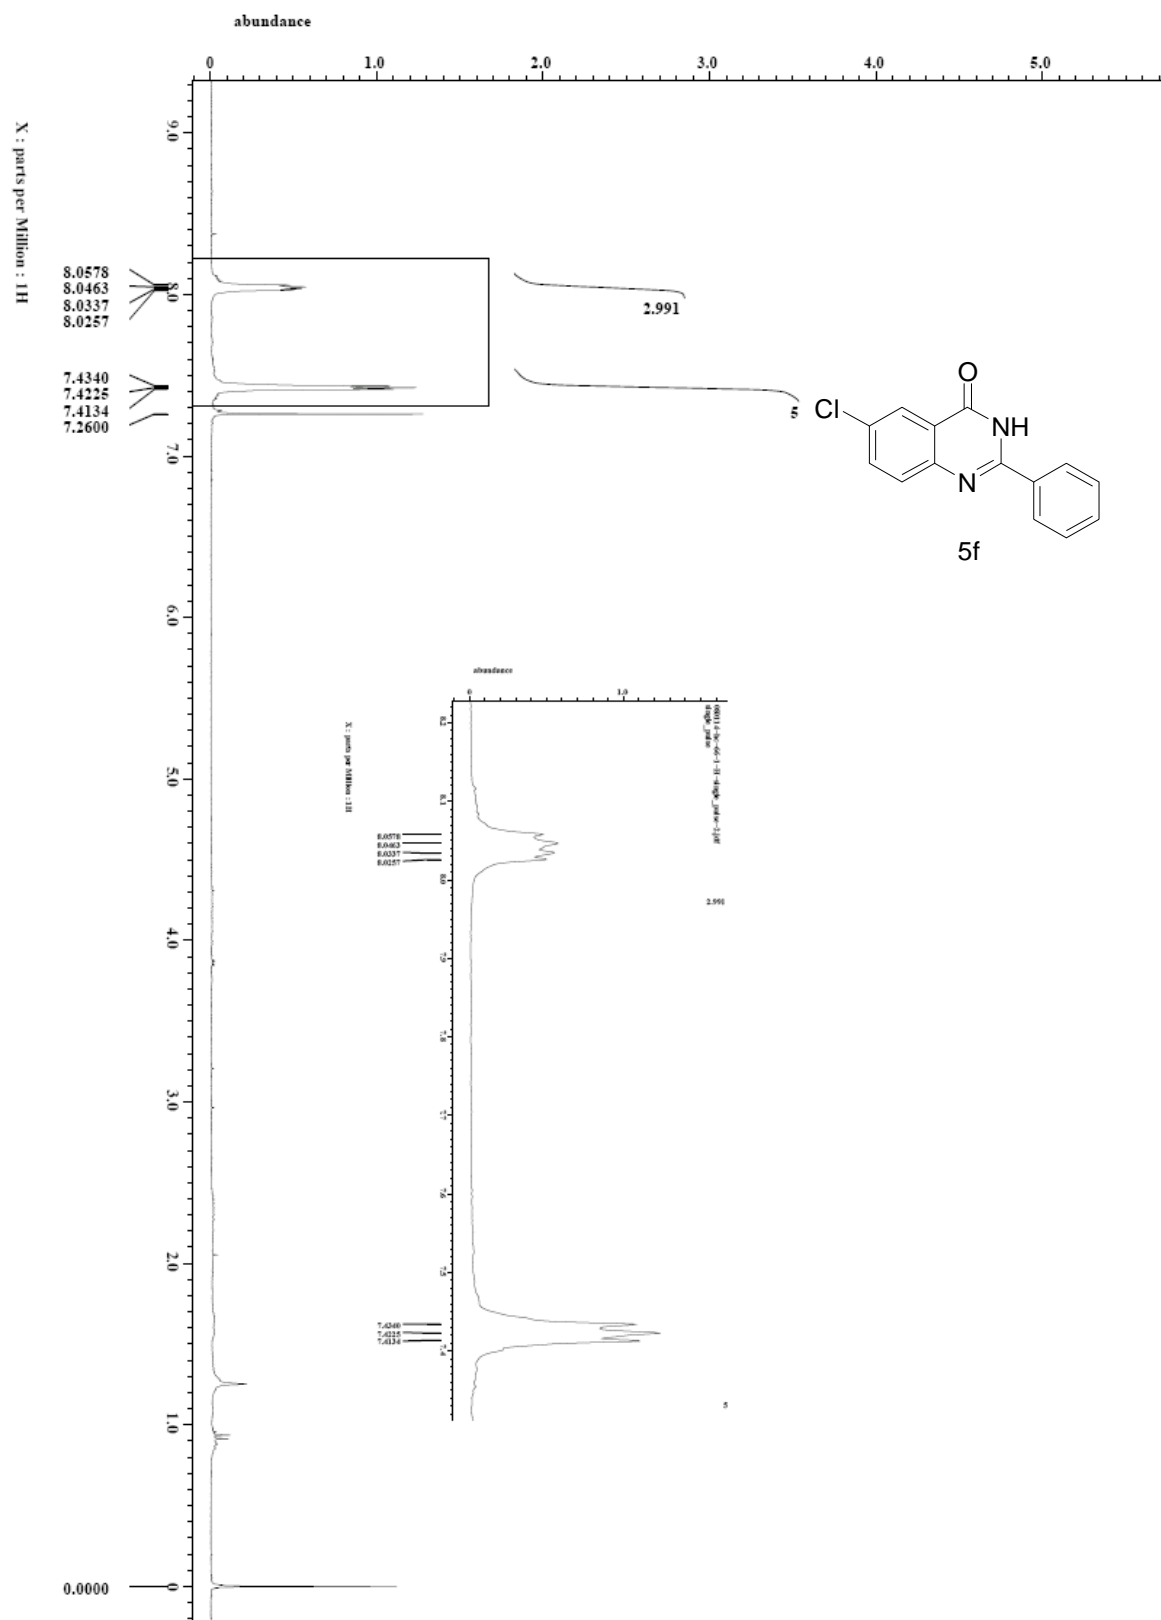

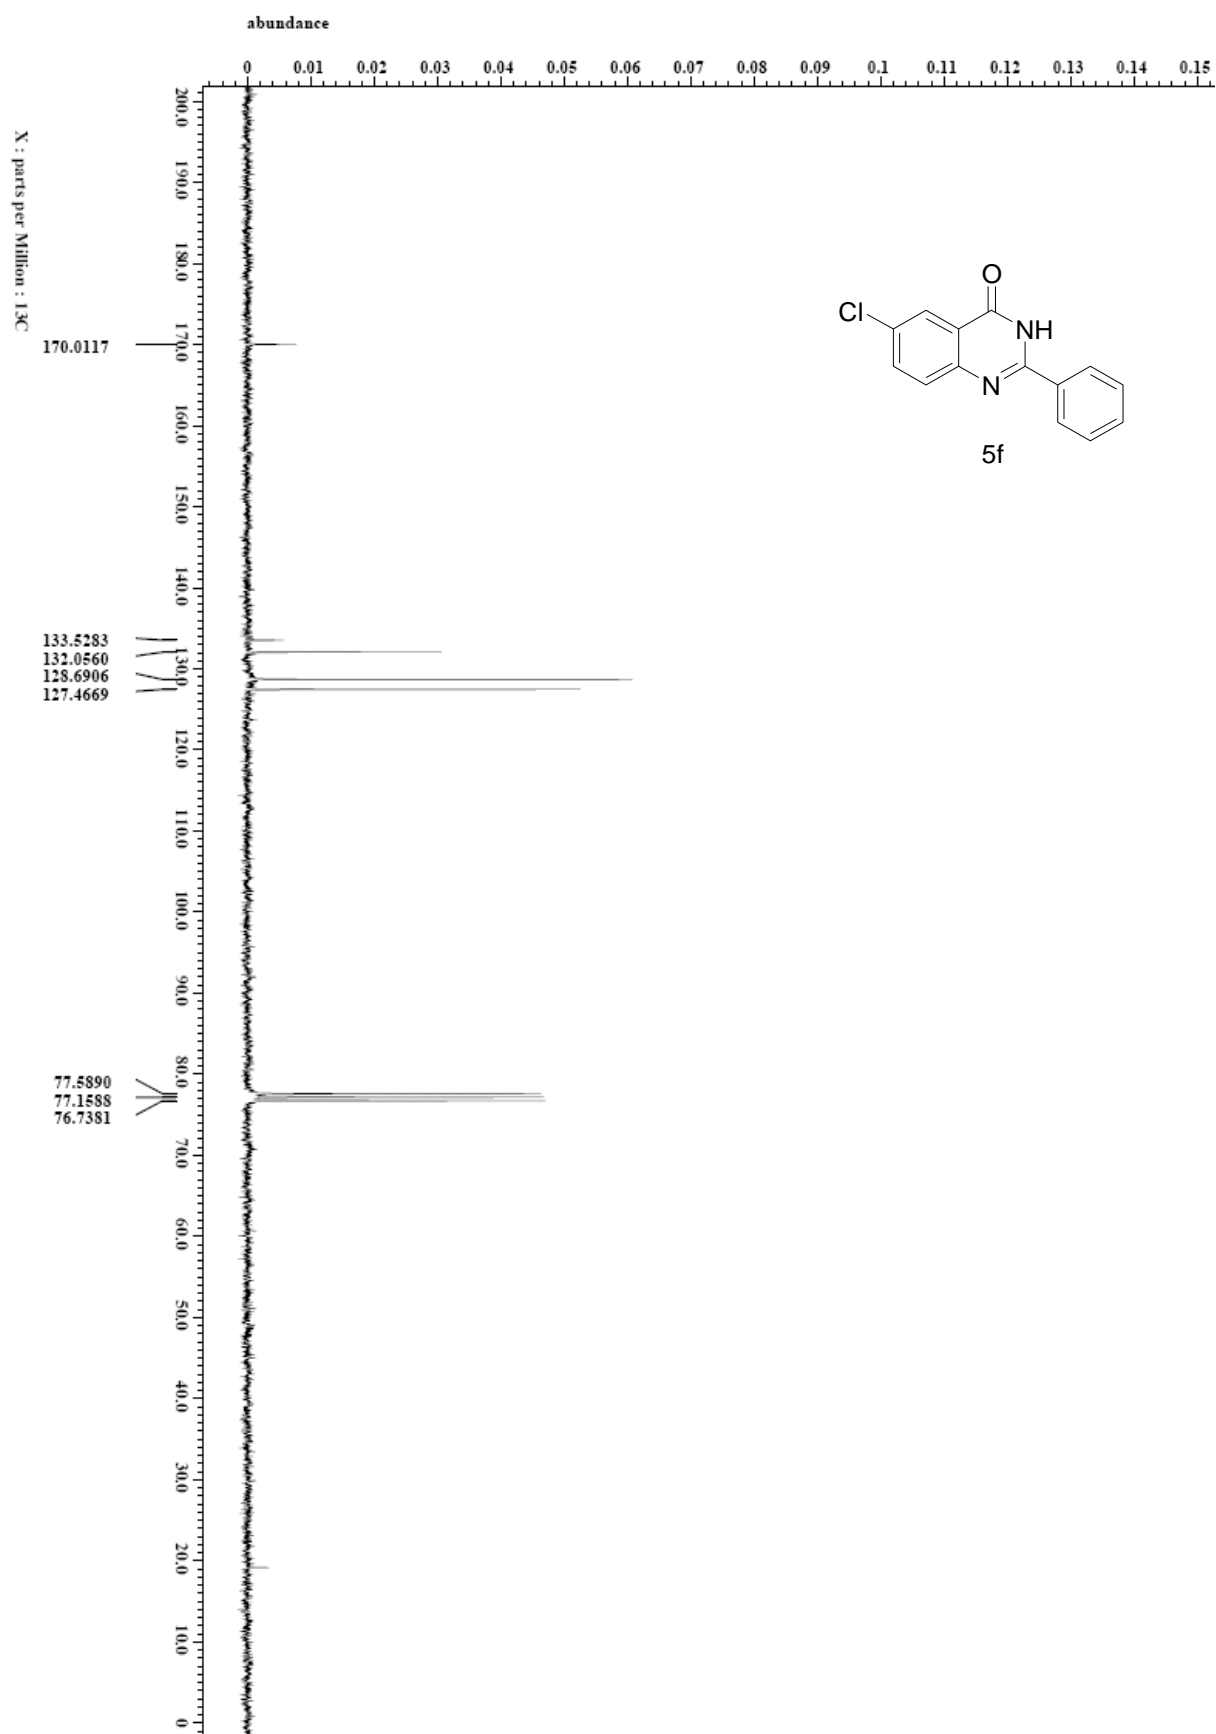

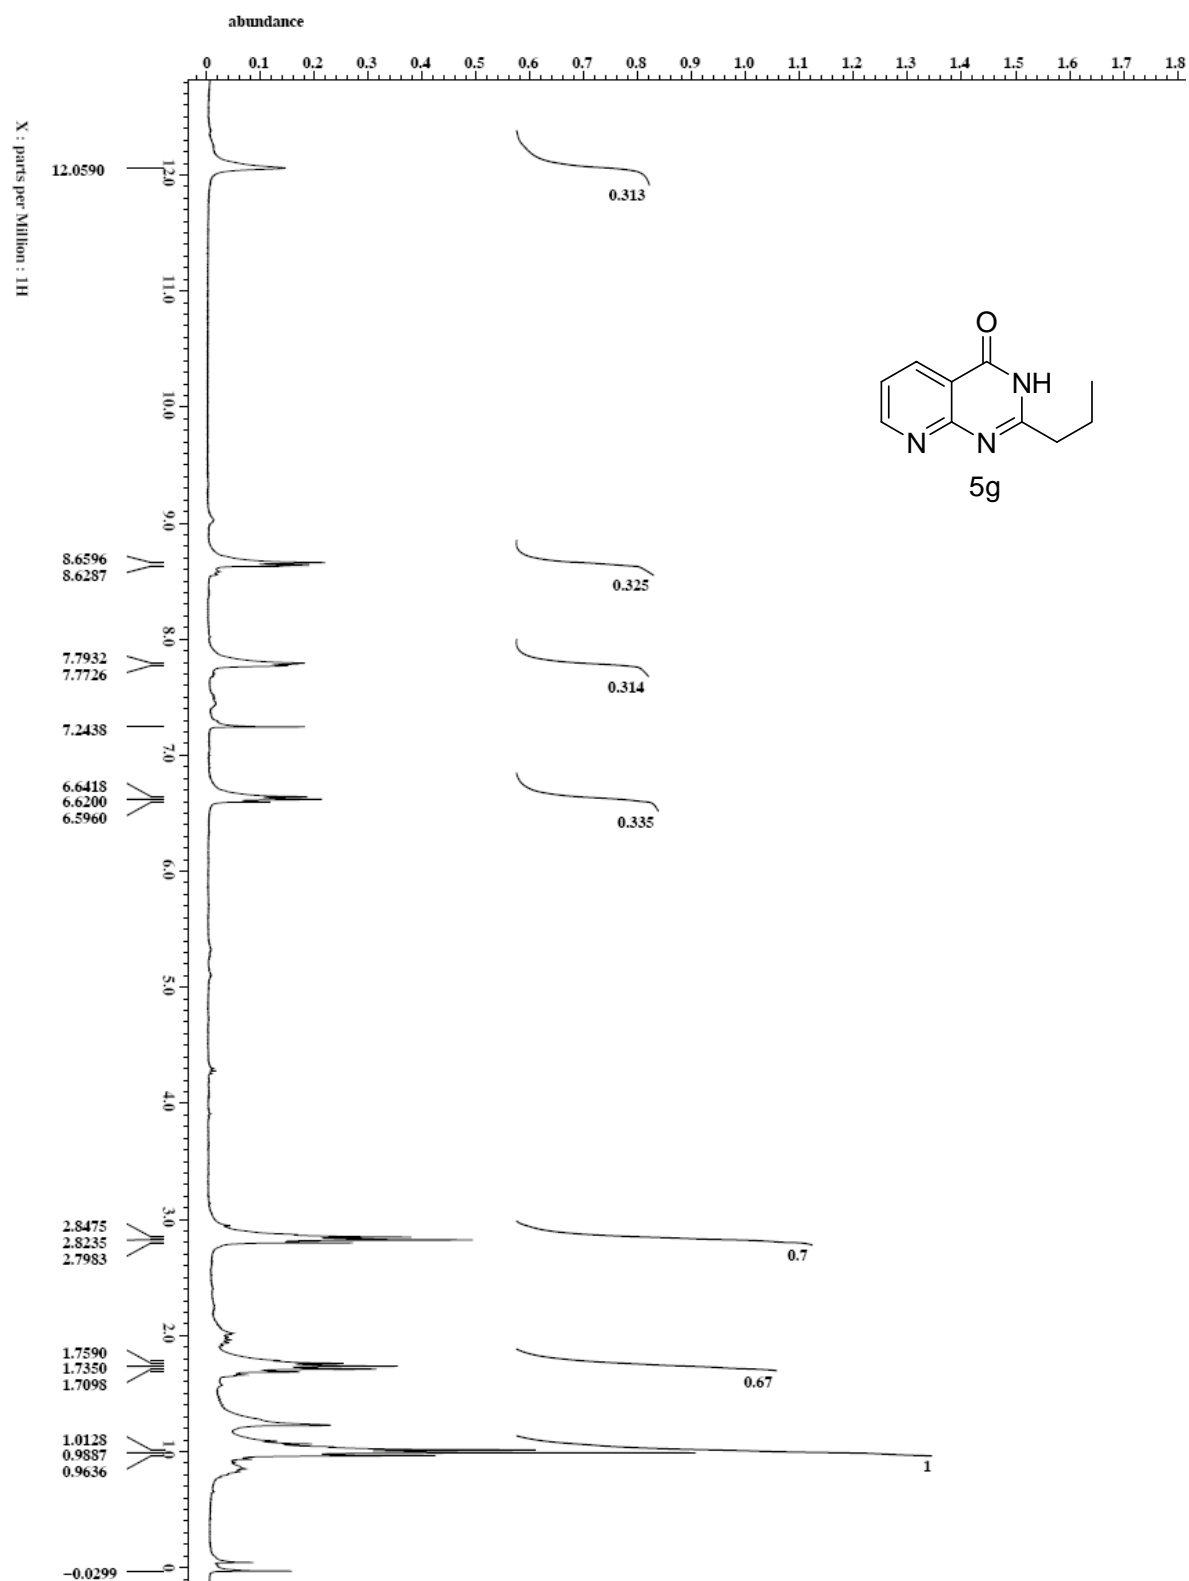

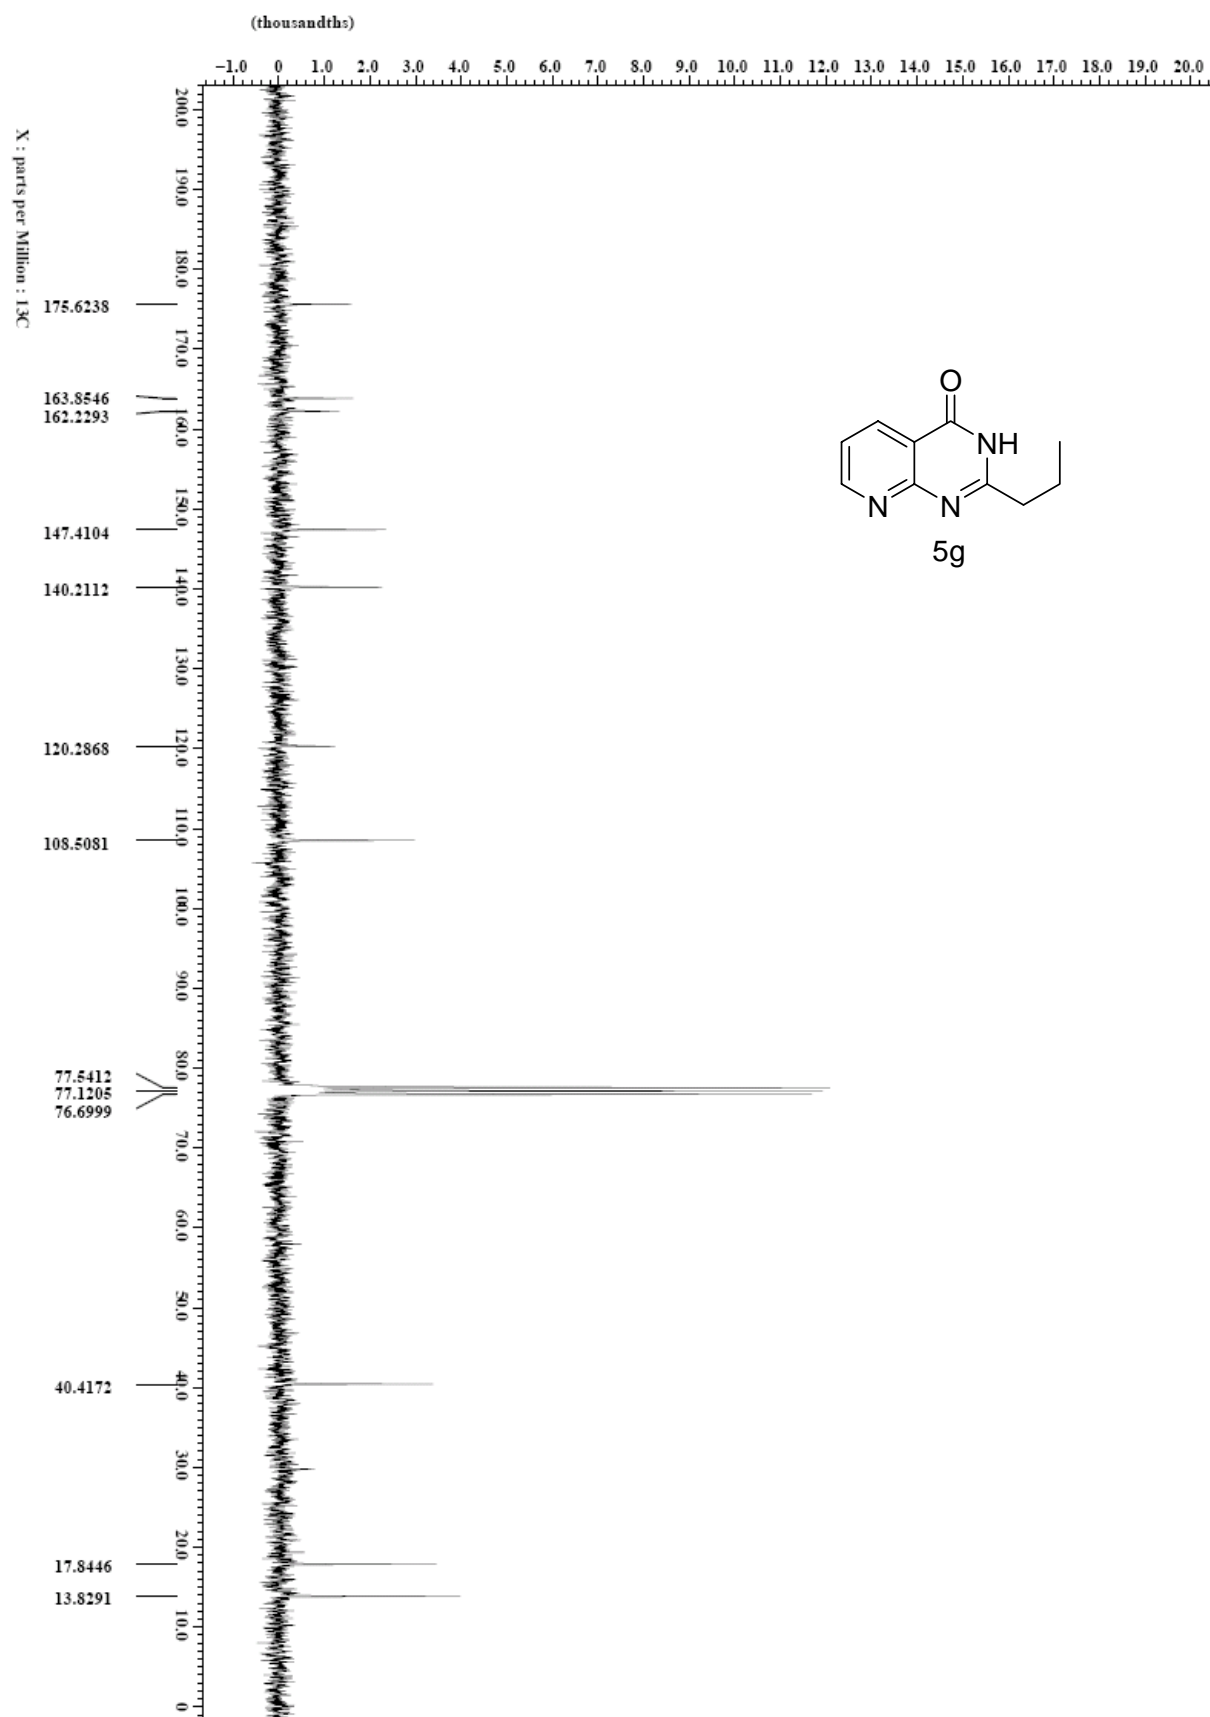

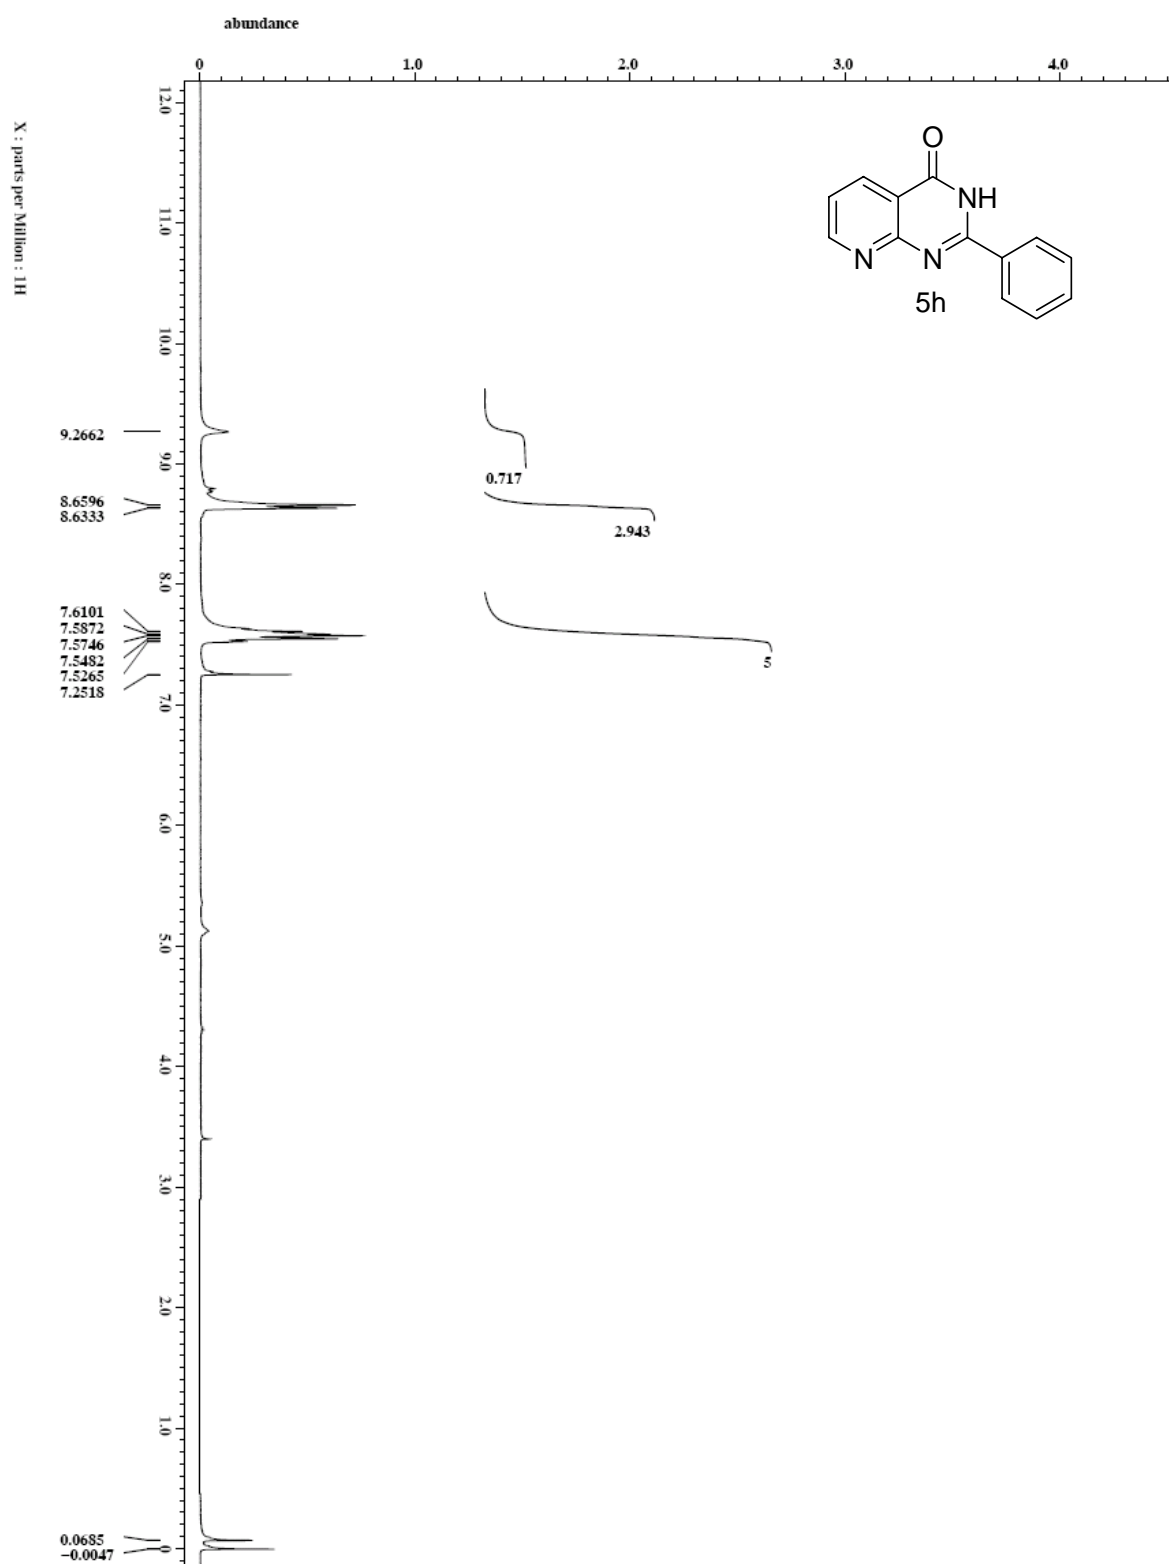

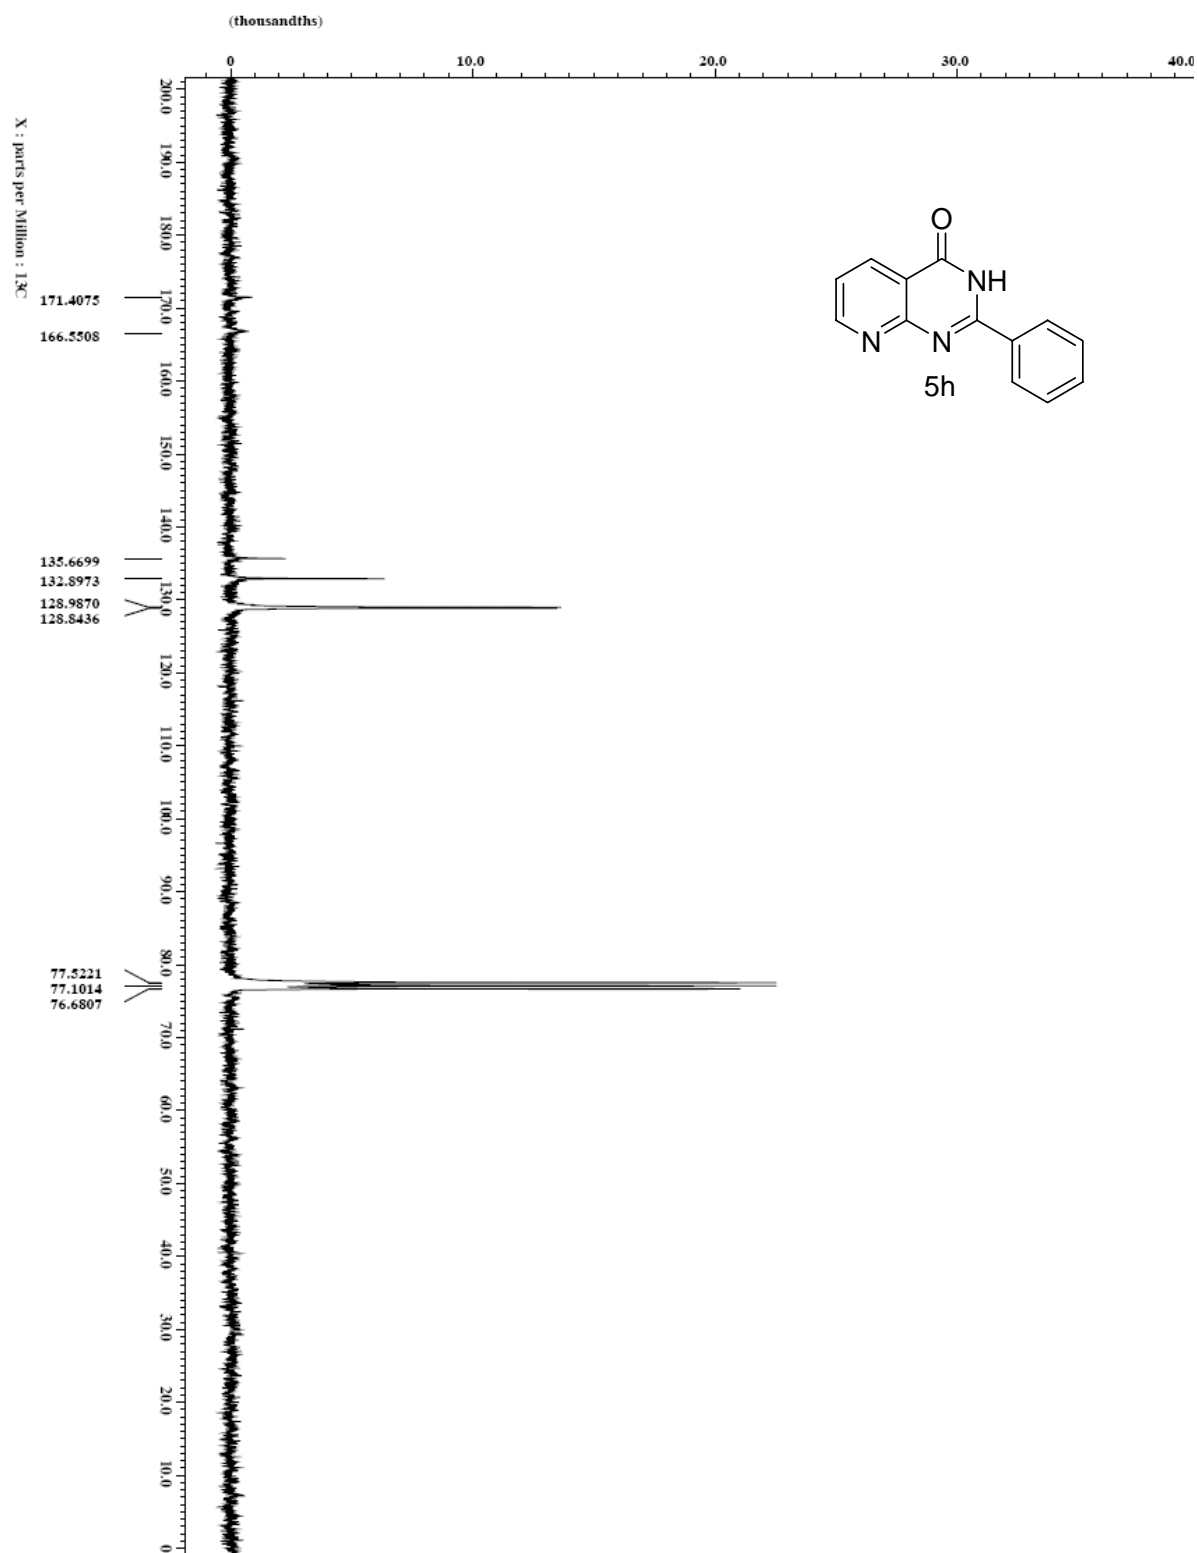

Supplement: b814011a.pdf [file b814011a.pdf]
